# Supplementary material for: Layer 6 corticocortical neurons are a major route for intra- and interhemispheric feedback
Source: eLife. 2025 Mar 28;13:RP100478. doi: 10.7554/eLife.100478 (PMC11952746; doi:10.7554/eLife.100478)
Supplement: Figure 1—figure supplement 1—source data 1. [file elife-100478-fig1-figsupp1-data1.xlsx]

## Sheet: Fig1_supp1B
Absolute detected cell numbers
VISp
mouse 1	192145
mouse 2	223479
mouse 3	61162
mouse 4	155688
mouse 5	148238
mouse 6	92299
SSp-bfd
mouse 1	103483
mouse 2	187083
mouse 3	258331
mouse 4	114800
mouse 5	175438
mouse 6	276933
MOp
mouse 1	217598
mouse 2	75807
mouse 3	165453
mouse 4	104957
mouse 5	211836
mouse 6	189931
