# Supplementary material for: Layer 6 corticocortical neurons are a major route for intra- and interhemispheric feedback
Source: eLife. 2025 Mar 28;13:RP100478. doi: 10.7554/eLife.100478 (PMC11952746; doi:10.7554/eLife.100478)
Supplement: Figure 1—figure supplement 2—source data 1. [file elife-100478-fig1-figsupp2-data1.xlsx]

## Sheet: Fig1_supp1BC
M1	SSp-ul	SSp-ll	SSs	Cing-bundle	M2	SSp-bfd	SSp-un	SSp-n	Callos	Optic rad	VISp	Callos	VISl	Optic rad	M1	M2
70.7265	23.8615	5.5964	0	0	0	99.979	0.0209751	0	0	0	98.7829	0.00961404	0	1.20058	34.17	65.83
79.4236	17.0642	1.76595	0	0	0	99.7698	0	0.230159	0	0	98.5293	0.00136016	0	1.469
77.0726	21.9589	0.968463	0	0	0	99.0533	0	0	0.0318776	0.914803	93.2835	0.0220925	4.28382	2.41
96.7223	0	0	3.0805	0.197	0	99.3711	0.202066	0	0.301007	0.125843	98.5857	0	0	1.412
79.5612	19.7321	0.71	0	0	0	99.9154	0	0	0.0572019	0.0273787	98.2154	0	0	1.758
97.7663	0	0	0	0	2.21808	100	0	0	0	0	98.5853	0.461294	0	0.95

## Sheet: Fig1_supp1D
VISp	cell number	Volume
mouse 1	192145	0.534493
mouse 2	223479	0.562383
mouse 3	61162	0.505877
mouse 4	155688	0.506968
mouse 5	148238	0.526588
mouse 6	92299	0.619679
SSp-bfd
mouse 1	103483	0.56536
mouse 2	187083	0.2604
mouse 3	258331	0.2551
mouse 4	114800	0.34516
mouse 5	175438	0.41636
mouse 6	276933	0.59597
MOp
mouse 1	217598	0.773763
mouse 2	75807	0.442514
mouse 3	165453	0.469484
mouse 4	104957	0.350716
mouse 5	211836	0.601194
mouse 6	189931	0.597454
MOs
mouse 1	400182	0.66
