# Supplementary material for: Layer 6 corticocortical neurons are a major route for intra- and interhemispheric feedback
Source: eLife. 2025 Mar 28;13:RP100478. doi: 10.7554/eLife.100478 (PMC11952746; doi:10.7554/eLife.100478)
Supplement: Figure 1—figure supplement 3—source data 1. [file elife-100478-fig1-figsupp3-data1.xlsx]

## Sheet: Fig1_supp3B
Injection Volume per layer
VISp	L1	L2/3	L4	L5	L6a/b
mouse 1	0.1	0.16	0.08	0.08	0.06
mouse 2	0.1	0.17	0.07	0.09	0.07
mouse 3	0.08	0.13	0.06	0.09	0.08
mouse 4	0.09	0.18	0.06	0.09	0.08
mouse 5	0.1	0.22	0.06	0.09	0.08
mouse 6	0.11	0.17	0.06	0.09	0.08
SSp-bfd
mouse 1	0.07	0.17	0.13	0.11	0.09
mouse 2	0.02	0.06	0.05	0.06	0.06
mouse 3	0.032	0.05	0.04	0.04	0.07
mouse 4	0.06	0.09	0.05	0.04	0.08
mouse 5	0.06	0.12	0.08	0.06	0.08
mouse 6	0.09	0.18	0.14	0.08	0.06
Mop
mouse 1	0.08	0.21		0.14	0.14
mouse 2	0.06	0.2		0.13	0.14
mouse 3	0.04	0.13		0.09	0.08
mouse 4	0.01	0.1		0.1	0.14
mouse 5	0.05	0.13		0.06	0.08
mouse 6	0.04	0.18		0.12	0.1
