# Supplementary material for: Layer 6 corticocortical neurons are a major route for intra- and interhemispheric feedback
Source: eLife. 2025 Mar 28;13:RP100478. doi: 10.7554/eLife.100478 (PMC11952746; doi:10.7554/eLife.100478)
Supplement: Figure 1—figure supplement 4—source data 1. [file elife-100478-fig1-figsupp4-data1.xlsx]

## Sheet: Fig1_supp4C
Overlap percentage with GAD	mean	sem
L2/3	3.22298	0.893895
L4	0.0263435	0.00730638
L5	0.0534188	0.0148157
L6	0.114371	0.0317207
Overlap percentage with Ntsr1
L6	0.854279	0.332713
