# Supplementary material for: Layer 6 corticocortical neurons are a major route for intra- and interhemispheric feedback
Source: eLife. 2025 Mar 28;13:RP100478. doi: 10.7554/eLife.100478 (PMC11952746; doi:10.7554/eLife.100478)
Supplement: Figure 1—source data 1. [file elife-100478-fig1-data1.xlsx]

## Sheet: Fig1A
VISp injection sites	Name	Axis0	Axis1	Axis2
mouse 1	SW_5070	8550	1070	2870
mouse 2	SW_4485	8740	900	3364
mouse 3	SW_4783	8863	1002	3142
mouse 4	SW_4784	8884	1316	2598
mouse 5	SW_5512	8695	1053	2999
mouse 6	SW_5121	9007	882	3435
SSp-bfd injection sites
mouse 1	SW_0936	6460	1620	8870
mouse 2	SW_7914	6260	1790	2550
mouse 3	SW_7917	6800	1430	2760
mouse 4	SW_8889	6670	1490	2660
mouse 5	SW_20331	6790	1620	2370
mouse 6	SW_20332	7040	1460	2350
MOp injection sites
mouse 1	SW_0937	4853	1730	7728
mouse 2	SW_1588	4368	1852	7451
mouse 3	SW_2119	4789	1739	7795
mouse 4	SW_8408	4784	1907	3579
mouse 5	SW_8888	4617	1710	7368
mouse 6	SW_20194	4648	1836	3478
Coordinates are in brainrender dimensions

## Sheet: Fig1B
VISp ipsi brainrender coordinates				VISp contra				SSp-bfd ipsi				SSp-bfd contra				MOp ipsi				MOp contra
ax1	ax2	ax3		ax1	ax2	ax3
10390	3630	1690		10350	1950	8530		10150	4710	1980		12570	5200	5710		10090	4420	1450		10200	4130	9800
10380	3570	1690		10300	2030	8440		10230	3550	2300		10370	3650	9500		10090	4420	1450		10060	4780	9720
10370	3600	1670		10330	1840	8360		10230	3480	2360		10250	4150	9480		10070	4790	2170		10210	3260	8940
10360	3640	1630		10310	1810	8270		10200	3540	2360		10340	3680	9700		10180	3470	1410		10260	3360	9900
10380	3550	1690		10310	1910	8370		10160	3700	2370		10060	4710	9910		10370	1980	2580		10270	3240	9870
10380	3540	1750		10370	1870	8530		9990	4980	2250		10190	4190	9270		10070	4410	1440		10200	3340	8940
10380	3540	1710		10330	1870	8390		10400	3010	2000		10160	4510	9280		10080	4510	1480		10060	4690	9150
10390	3360	1740		10300	1860	8300		10180	3610	2130		10190	4210	9300		10080	4520	1490		10280	2820	8900
10380	3570	1850		10300	1870	8270		9990	4820	2360		10180	4200	9260		10060	4810	2210		10360	2330	8970
10390	3330	1750		10300	1900	8350		10370	2730	2290		10170	4200	9230		10260	3340	2270		10220	3300	9960
10390	3340	1750		10300	1910	8380		10300	3060	2290		10140	4240	9170		10190	3630	2330		9990	4470	9000
10400	3350	1750		10300	1980	8430		10210	3780	1820		10170	3870	9130		10070	4410	1410		10050	4620	9960
10390	3360	1820		10360	1910	8540		10000	4620	2350		10120	4200	9130		10090	4570	1530		10290	2760	9660
10390	3360	1710		10310	1850	8330		10030	4180	2200		10250	3520	9130		10070	4880	2150		10190	2920	8770
10370	3550	1750		10320	1870	8390		10210	3940	1790		10110	4240	9150		10250	3300	2290		10220	3300	9960
10340	3580	1600		10290	1910	8340		10160	3550	2090		10110	4240	9110		10260	3340	2270		10050	4630	9970
10390	3340	1750		10360	1970	8560		10240	3070	2410		9980	5060	9540		10070	4410	1370		10150	3820	10080
10380	3340	1690		10360	1970	8560		10150	3550	2120		10010	4930	9160		10290	3170	2200		10100	4360	10010
10390	3350	1820		10340	1990	8540		9910	5190	2340		10160	3670	9360		10040	4370	1310		10070	3510	8810
10390	3370	1860		10360	1860	8510		10090	3800	2060		10200	3540	9350		10120	3520	1360		10020	4660	9990
10360	3530	1750		10340	1830	8420		10190	3110	2500		10190	3560	9420		10020	4870	2270		9980	4770	9070
10370	3540	1790		10320	1820	8330		10130	3440	2200		10100	3880	9360		10040	4870	2240		10290	2300	8680
10390	3350	1810		10360	1900	8530		9990	4480	1870		10060	4180	9270		10120	3540	1330		10280	2370	8680
10380	3420	1750		10340	1890	8470		10370	2840	1910		10170	3580	9380		10030	4530	1310		10260	2410	8660
10380	3430	1800		10370	1910	8550		10090	3520	2070		10060	4150	9490		10020	4870	2280		10000	4640	10040
10370	3540	1820		10310	1870	8350		10060	3820	2510		10380	2850	9260		10030	4870	2260		10350	2010	8850
10330	3610	1540		10310	1870	8350		9910	5160	1930		10270	3340	9920		10120	3520	1330		10340	2030	8890
10350	3510	1640		10360	1960	8570		10180	3050	2570		10160	3540	9310		10120	3520	1330		9990	4670	10040
10350	3520	1660		10310	1900	8370		10230	3730	1380		10160	3580	9400		10120	3540	1330		9990	4650	10060
10360	3520	1720		10350	1970	8560		10110	3920	1710		10080	3850	9340		10030	4390	1330		9980	4670	10050
10370	3540	1790		10330	2000	8520		10170	3080	2570		10090	3770	9760		10040	4540	1420		9980	4680	10070
10330	3590	1610		10300	1980	8440		10250	3530	1470		9850	4950	10090		10020	4860	2280		9940	5070	9720
10300	3700	1490		10320	2010	8500		10000	4940	1630		10140	3450	9560		10030	4940	2200		9940	5030	9100
10340	3330	1610		10310	2000	8460		10090	3530	2040		10110	3530	9470		10250	3260	2300		9970	4680	10070
10390	3100	1720		10310	2010	8470		10210	3700	1380		10010	4180	10230		10240	3280	2290		10160	3150	9480
10320	3340	1590		10290	2010	8420		10130	3410	1980		10020	4210	9630		10140	3450	1360		10070	3870	10180
10350	3030	1660		10340	1740	8320		10030	3690	2080		10140	3440	9450		10200	3450	2340		10260	2510	9570
10310	3400	1550		10370	1830	8510		10050	3470	2370		10110	3590	9670		10050	4620	1470		10260	2500	9590
10320	3410	1590		10360	1840	8500		10110	4040	1510		10050	3730	9600		10320	2870	2210		10310	1970	8950
10280	3480	1490		10330	1880	8430		10100	3520	1900		10060	3750	9420		10270	3130	2260		9950	4660	10090
10280	3690	1460		10310	1870	8340		10090	3530	1900		10060	3780	9640		10110	3530	1310		9940	4680	10090
10320	3380	1600		10320	1900	8410		10100	3510	1970		10110	3550	9500		10020	4360	1280		10310	1950	8970
10310	3400	1590		10370	1960	8590		9830	5350	2110		10030	3920	9500		10020	4520	1280		10270	2490	9590
10290	3440	1520		10350	1950	8550		10070	3600	1900		9970	4200	9950		10010	4830	2310		10180	2310	8320
10280	3540	1450		10290	1890	8290		9880	4500	1810		10030	3900	9950		9990	4610	1320		10270	2480	9580
10310	3670	2070		10290	1950	8360		10040	3450	2490		10080	3570	9480		10340	1790	2660		9930	4690	10100
10280	3690	1460		10340	2020	8560		10060	3510	2620		10090	3600	9220		9990	4510	1220		10290	1940	8980
10390	2780	2040		10330	2010	8540		10030	3470	2420		10010	3880	9340		10000	4520	1250		10290	1940	8980
10330	2900	1690		10290	1980	8410		10040	3540	2050		10000	3880	9550		9990	4600	1280		10050	3480	9200
10340	2960	1700		10360	2060	8630		10000	3660	2090		10100	3480	9540		9980	5020	2260		10070	3640	10140
10340	2980	1690		10310	2030	8490		10060	3320	2430		10010	3840	9350		9990	4560	1260		9990	3750	9060
10330	3060	1630		10340	2080	8600		10050	3400	2430		10050	3770	9740		9990	4580	1270		9880	5100	9090
10310	3340	1580		10330	1790	8310		10110	3570	1750		10000	3970	9360		10330	1870	2510		10270	1910	9000
10320	3340	1590		10330	1880	8430		10000	3650	2060		9900	4510	10260		9980	4650	1320		9830	5200	8980
10310	3380	1570		10340	1900	8490		10110	3710	1570		9820	5440	9120		9960	5080	2300		10140	2340	8250
10290	3400	1530		10290	1890	8280		10050	3570	1900		10100	3460	9650		10330	1870	2540		9920	4650	10150
10310	3420	1580		10300	1960	8440		10090	3690	1700		9990	3850	9320		9990	4490	1250		9910	4680	10150
10290	3430	1560		10330	2000	8520		10030	3370	2380		10080	3470	9150		9970	5050	2300		9910	4670	10160
10290	3440	1540		10340	2040	8600		10050	3490	1960		10090	3480	9140		10290	1940	2490		9910	4680	10160
10280	3450	1520		10350	2020	8580		10050	3400	2110		10050	3590	9470		10170	3390	2410		10270	1930	9030
10320	3590	2080		10290	1970	8370		10010	3430	2400		10050	3590	9610		9980	4640	1310		10150	2780	9150
10260	3630	1440		10330	2070	8580		10010	3780	1900		10020	3730	9520		9970	4650	1280		10080	2970	9130
10320	3950	1750		10260	2010	8290		10060	3330	2140		10040	3580	9370		9980	4700	1350		9900	4640	10160
10340	2910	1690		10360	1740	8420		10110	3320	1870		10030	3670	9410		9980	4710	1370		9910	4650	10160
10270	3470	1490		10340	1750	8330		10020	3390	2450		10050	3510	9490		9960	4940	2350		10260	1890	9030
10300	3670	2070		10340	1760	8320		10060	3410	1980		10020	3610	9500		10320	1910	2510		10260	1910	9030
10340	2910	1690		10310	1810	8290		10060	3510	1920		10010	3640	9530		10310	1920	2530		10260	1930	9030
10340	2920	1680		10300	1840	8290		10150	3520	1540		10020	3740	9400		10190	3290	2310		9900	4630	10190
10340	2940	1680		10330	1930	8530		10030	3550	1900		10010	3810	9820		10180	3320	2360		9900	4650	10170
10330	3050	1610		10290	1890	8290		10060	3610	1810		9980	3840	9700		9960	4570	1210		9900	4660	10180
10340	3060	1660		10340	1960	8540		9980	3730	2070		9970	3870	9580		9970	4620	1260		10260	1910	9040
10280	3410	1520		10340	1960	8540		10000	3380	2430		9990	3730	9570		9970	4620	1270		10260	1910	9030
10330	2910	1670		10320	1960	8490		10020	3420	2380		9960	3910	9380		10180	3290	2500		10140	2250	8150
10330	3010	1640		10300	1960	8450		10040	3440	2060		9940	4140	9550		10160	3410	2420		10260	1900	9040
10320	3100	1600		10360	2040	8630		10010	3580	1940		10020	3680	9700		9990	4250	1150		10120	2310	8170
10340	3090	1640		10320	2010	8520		10360	2000	2750		10000	3720	9360		9970	4670	1320		9900	4650	10190
10280	3400	1530		10330	2020	8540		10290	2180	2820		10020	3560	9710		9980	4740	2010		9990	3320	9110
10270	3420	1500		10270	1970	8330		10260	2210	2700		9960	3850	9480		9980	4700	1340		9980	3320	9110
10280	3430	1500		10290	2050	8470		10260	2260	2520		9920	4140	9370		9980	4720	1360		10030	3350	9570
10250	3650	1430		10280	2060	8460		10010	3380	2370		9900	4320	9820		9960	4960	2350		10000	2650	8250
10360	2750	1870		10270	2060	8400		10170	3420	1360		9970	3780	9400		10290	1940	2520		10010	2680	8260
10340	2920	1760		10320	1790	8290		9980	3470	2260		9950	3980	9550		10290	1940	2530		10100	2860	9940
10310	2980	1630		10340	1900	8510		9750	5430	2390		10010	3650	9560		10090	1000	3700		10100	2870	9950
10330	2990	1660		10280	1930	8340		10360	2000	2780		9960	3890	9770		10260	1560	2990		9800	5180	9980
10280	3330	1550		10370	2040	8640		10040	3320	2080		10020	3440	9480		10280	1960	2490		9990	2700	8250
10260	3400	1490		10290	1970	8420		10030	3640	1760		10010	3490	9350		9950	4250	1110		10220	1880	9080
10270	3430	1500		10310	2010	8500		10250	2270	2640		9970	3680	9620		10130	3360	2480		10220	1880	9080
10250	3460	1450		10320	2050	8550		10240	2340	2700		9940	3880	9910		9910	4540	1120		10000	2670	8240
10340	2860	1750		10300	2020	8490		10260	2360	2260		9920	3910	9560		10260	2640	2280		10210	1870	9090
10320	2930	1700		10280	2020	8420		10060	3270	2040		9930	3910	9260		10040	1700	3790		9850	4600	10250
10310	2990	1630		10360	2090	8650		10070	3360	1840		9950	3720	9410		9990	3840	1170		9780	5190	10000
10310	3020	1610		10270	2040	8400		10040	3390	1950		10300	2320	9270		9940	4280	1110		9770	5190	10000
10320	3030	1660		10330	2110	8600		10020	4030	1530		10070	3280	9530		9850	5250	2430		9780	5290	9740
10320	3040	1670		10270	2070	8420		10250	2330	2410		10050	3360	9230		10000	3690	1180		9750	5470	8990
10320	3060	1660		10270	2090	8420		10210	2350	2720		10040	3370	9420		9980	3840	1170		9960	3150	9190
10310	3050	1610		10310	2110	8540		10110	2970	2400		10030	3400	9520		9950	4190	1130		9940	2730	8200
10300	3160	1560		10370	1810	8510		10190	3150	1430		10030	3430	9620		9920	4350	1150		9690	5670	9250
10280	3350	1540		10330	1760	8290		10060	3680	1610		10000	3570	9800		9930	4830	2050		10170	1850	9120
10270	3400	1530		10330	1770	8310		10010	3390	2200		9970	3650	9370		10250	1940	2450		9930	2720	8180
10370	2730	1880		10280	1890	8300		9970	3520	2070		9960	3700	9360		10250	1970	2450		9920	2750	8200
10310	2900	1710		10280	1910	8270		10240	2220	2730		9950	3740	9440		10070	2480	3180		9800	4640	10310
10340	2950	1750		10300	2040	8500		10210	2250	2730		9940	3870	9770		9920	4250	1100		9690	5680	9260
10310	2970	1640		10290	2060	8480		10200	2320	2840		9910	4050	9720		9740	5610	2250		9710	5210	10120
10320	3020	1680		10330	2130	8600		10310	2340	1990		9900	4120	9430		10040	1970	3590		10150	1280	7570
10310	3030	1610		10270	2110	8430		10220	2360	2420		9980	3570	9680		10010	3490	1690		9880	2800	8170
10290	3040	1590		10270	2110	8440		9960	3490	2120		9980	3570	9340		9960	3860	1120		9840	3510	9450
10310	3080	1600		10350	1730	8350		10010	3630	1800		9980	3590	9180		10070	2280	3310		9870	2800	8140
10300	3150	1580		10290	1860	8320		10240	2240	2680		10040	3300	9330		9900	4320	1120		9870	2820	8160
10270	3290	1540		10300	1840	8260		10240	2360	2340		10010	3380	9480		9890	4350	1120		10020	2770	10010
10240	3480	1420		10290	2060	8500		10220	2400	2340		10010	3440	9400		10010	1890	3680		9810	3400	9040
10340	2960	1740		10330	2110	8600		10160	3090	1430		9920	3980	9750		9970	3690	1160		9930	2690	8840
10300	2990	1620		10260	2050	8350		10000	3310	2300		9980	3500	9480		9880	4140	2050		9790	3600	9680
10220	3520	1390		10250	2050	8310		9990	3360	2420		9960	3590	9650		9890	4260	1090		9870	3380	10220
10330	2820	1760		10260	2070	8350		9960	3450	2290		9970	3600	9720		9790	5300	2480		9740	3790	9260
10320	2870	1770		10270	2080	8400		10240	2210	2810		10020	3380	9250		10260	1780	2440		9590	5430	10100
10310	2850	1690		10270	2080	8400		10230	2200	2600		10000	3470	9210		10250	1870	2450		9780	3450	9620
10320	2920	1760		10270	2100	8410		10200	2300	2760		9920	3800	9600		10240	1960	2430		9790	3330	9560
10290	2950	1630		10260	2100	8390		10200	2310	2720		9950	3600	9640		10040	2070	3500		9520	5370	10190
10290	2970	1620		10350	1730	8370		10210	2340	2540		9930	3640	9480		10050	2310	3290		9620	4360	9750
10300	3020	1610		10350	1870	8500		10040	3420	1840		9930	3660	9440		10050	2300	3270		9600	4730	10430
10290	3060	1590		10360	1930	8580		10060	3520	1680		9940	3690	9770		10070	3370	2550		9510	5500	10080
10260	3310	1540		10340	1910	8530		10010	3690	1730		9960	3710	9220		9960	3690	1160		9750	3230	9530
10270	3340	1540		10300	1850	8270		9880	3930	2380		9940	3770	9950		9890	4280	1090		9550	4610	9680
10250	3380	1500		10290	1880	8260		10240	2180	2600		9860	4220	10380		10240	1890	2480		9800	3210	9680
10230	3480	1410		10280	1890	8250		10220	2250	2710		9930	3680	9720		10040	2040	3520		9790	3010	9430
10310	2870	1700		10270	1930	8320		10200	2350	2470		9910	3970	10050		10050	2310	3310		9810	2890	9180
10290	2930	1630		10360	2070	8670		10150	3150	1400		9970	3490	9710		10030	2530	3210		9410	5970	9480
10280	3070	1570		10350	2070	8650		10260	2100	2790		9960	3510	9350		9880	4320	1110		9410	5970	9450
10220	3520	1420		10340	2130	8640		10250	2150	2630		9960	3550	9240		9880	4360	1110		9730	3200	9550
10310	2870	1700		10290	2090	8510		10180	2230	3110		9930	3760	9210		9860	4460	1070		9650	3440	8890
10310	2880	1710		10260	2090	8390		10230	2190	2800		9910	3780	9340		9840	4930	2560		9560	4380	9820
10310	2910	1710		10250	2100	8360		10140	2370	2990		9890	3880	9760		9840	4980	2550		9920	1200	7120
10290	2920	1620		10330	2150	8630		9940	3490	2260		9790	4420	10350		9820	5130	2500		9910	1210	7120
10290	2990	1610		10330	2150	8610		10030	3590	1610		9980	3420	9530		9820	5160	2500		9370	5940	9610
10290	3010	1600		10250	2130	8390		10020	3670	1630		9920	3650	9510		10050	3240	1290		9640	3440	9760
10280	3110	1580		10280	1880	8240		9960	4160	1440		10000	3370	9250		10050	3240	1290		9440	4900	9800
10260	3290	1530		10280	1890	8240		10240	2140	2840		9930	3630	9320		10050	3240	1290		9710	3060	9600
10240	3400	1500		10360	2070	8670		10180	2240	3110		9840	4220	10380		9880	4360	1110		9780	2650	9470
10220	3450	1430		10330	2090	8610		10170	2250	3120		10000	3340	9660		9810	5130	2510		9670	3140	9570
10210	3520	1370		10310	2110	8600		10220	2260	2490		9910	3650	9320		10020	2100	3510		9320	5800	9940
10200	3560	1370		10250	2030	8290		10230	2380	2100		10000	3250	9520		9820	4550	1060		9280	6030	9610
10240	3750	2220		10240	2050	8300		9960	3410	2140		9950	3540	9220		9930	3600	1760		9630	3230	9660
10300	2860	1680		10330	2140	8630		10050	3410	1710		10010	3190	9210		9810	4560	1030		9670	3110	9590
10310	2880	1710		10260	2150	8460		9940	3500	2180		9980	3360	9680		10000	2340	3270		9600	3410	9770
10290	2950	1620		10310	1800	8260		9990	3500	1880		9970	3380	9660		10030	3360	2630		9260	6040	9610
10230	3400	1460		10290	1870	8240		10100	3560	1260		9950	3520	9800		9960	3500	1190		9260	6110	9460
10230	3400	1460		10290	2070	8510		9750	5500	1740		9960	3390	9580		9810	4570	1040		9260	6050	9570
10210	3500	1380		10330	2140	8630		10260	2130	2690		9980	3430	9130		9970	1920	3690		9600	3270	9710
10210	3520	1370		10250	2110	8360		10210	2220	2890		9950	3490	9800		10000	2400	3290		9490	3920	10490
10270	3080	1540		10370	1820	8530		10220	2260	2380		9950	3520	9190		10090	3030	2590		9770	1880	9530
10260	3110	1550		10350	1880	8520		10200	2270	2610		9940	3620	9180		10080	3230	2480		9620	3040	9620
10260	3120	1540		10300	1830	8260		10190	2310	2480		9900	3700	9290		9990	3370	1220		9550	3400	9760
10310	2770	1760		10290	1870	8240		10010	3270	2090		9900	3800	9250		10040	3320	2620		9670	2820	9480
10230	3330	1500		10270	1910	8240		9910	3600	2310		10260	2260	9220		9960	3480	1750		9610	3060	9640
10220	3390	1460		10370	2080	8700		10260	2080	2770		10230	2350	9200		9850	4270	1060		9580	3200	9740
10220	3390	1460		10350	2090	8660		10250	2130	2780		10230	2300	8760		10030	930	3820		9530	3440	9810
10290	2840	1690		10340	2100	8640		10240	2150	2610		9970	3370	9160		10000	2100	3510		9750	980	6800
10290	2850	1710		10330	2100	8620		10240	2180	2770		9970	3400	9150		9990	2430	3290		9190	5450	9590
10290	2840	1670		10240	2040	8260		10220	2200	2760		9890	3710	9670		10080	3010	2590		9580	3130	9680
10250	3220	1520		10240	2080	8310		10210	2210	2640		9890	3710	9800		9800	4580	1040		9720	1860	9550
10230	3350	1490		10240	2110	8330		10230	2240	2390		9840	4240	9010		9820	4990	1360		9490	3510	9800
10280	2840	1710		10250	2150	8410		10200	2290	2820		10210	2370	9200		9690	5560	2450		9250	5150	10440
10260	2940	1720		10270	1900	8200		10200	2320	2400		9960	3500	8910		10030	930	3830		9510	3480	9840
10270	2930	1600		10370	2090	8700		10140	3150	1400		9920	3580	9810		10070	3010	2590		9470	3640	9880
10240	3010	1540		10270	2100	8540		10070	3250	1840		9920	3550	9270		9780	4600	1020		9420	4070	9940
10230	3070	1520		10350	2150	8690		9960	3450	2010		9920	3640	9930		9790	4600	1030		9530	3150	9700
10250	3080	1520		10300	2120	8570		9940	3460	2150		9890	3630	9420		9910	3580	1620		9490	3340	9790
10240	3130	1530		10290	2140	8560		10030	3540	1630		9780	4340	9880		9820	4210	2020		9450	3750	9890
10220	3260	1510		10240	2080	8300		9930	3570	2130		10180	2420	9290		10160	2480	1640		9110	6010	9830
10230	3270	1500		10240	2080	8300		10010	3570	1690		9910	3500	9410		10150	2490	1640		9510	3340	9810
10230	3310	1500		10310	2170	8600		10000	3630	1710		9940	3550	9120		9920	3500	2000		9490	3420	9840
10270	2830	1680		10240	2130	8380		10020	3670	1530		9890	3580	9540		9900	3590	2020		9100	6250	9410
10260	2850	1630		10310	2190	8610		10210	2070	3100		9870	3690	9430		9820	4250	1040		9540	3030	9650
10270	2880	1620		10340	1910	8540		10210	2200	2820		9880	3730	9240		9960	2020	3600		9410	3950	9950
10260	2900	1620		10320	1980	8560		10190	2280	2720		9600	5650	9720		10180	1970	2110		9330	4480	9960
10240	3080	1520		10260	2020	8430		10200	2280	2450		9980	3240	9420		10180	1980	2110		9500	3250	9870
10220	3230	1500		10350	2110	8680		10200	2320	2250		9940	3430	9720		9880	3540	1920		9500	3250	9750
10270	2820	1700		10290	2120	8550		10170	2360	2650		9920	3430	9360		9780	4100	1940		9050	6430	8860
10250	2880	1610		10340	2170	8680		10210	2360	2240		9910	3560	9320		9770	4110	1790		9490	3220	9740
10240	3040	2480		10330	2180	8670		10150	3010	1430		9900	3560	9360		10140	2460	1660		9490	3250	9790
10230	3150	1500		10290	2140	8550		10120	3000	1910		9910	3620	9840		9740	4980	2640		9480	3220	9800
10200	3360	1450		10320	2190	8640		10130	3140	1400		9820	4060	10100		9750	4880	1160		9390	3760	9890
10170	3450	1370		10300	2170	8580		10000	3180	2530		10160	2360	9370		9920	2860	3180		9320	4390	9970
10260	2810	1670		10300	2200	8600		9970	3400	2090		9880	3560	9550		9850	4030	1020		9050	6310	9370
10260	2830	1650		10240	2200	8420		10030	3420	1690		9960	3280	9220		10170	1730	2330		9630	1860	9600
10190	3380	1430		10340	1680	8310		9920	3500	2290		9950	3420	9090		10170	1780	2300		9250	4780	9900
10190	3380	1430		10330	1710	8260		10290	2020	2660		9870	3650	9750		9950	2350	3350		9610	2040	9740
10180	3430	1380		10330	1720	8250		10230	2170	2560		10180	2310	9400		9920	2860	3180		9580	2060	9760
10160	3520	1330		10330	1740	8280		10180	2230	2750		10220	2270	8800		9990	3110	2750		9480	3050	9660
10270	2790	1710		10320	1770	8360		10180	2280	2700		10140	2400	8460		9930	3430	1180		9440	3250	9790
10230	3110	1520		10280	1860	8190		10180	2320	2650		9960	3360	9120		9850	3980	1030		9450	3300	9990
10220	3260	1500		10280	2030	8500		9950	3330	2320		9940	3390	9170		9760	5030	1320		9000	6260	9530
10170	3430	1370		10360	2120	8720		9980	3770	1670		9900	3440	9560		10170	2170	1890		9650	870	6690
10260	2810	1700		10350	2120	8680		9990	3830	1500		9880	3560	9710		10160	2330	1750		9400	3400	9870
10240	2810	1650		10340	2140	8670		10260	2000	2920		9920	3550	9100		9930	2540	3320		9040	5490	9810
10270	2860	1720		10320	2140	8620		10240	2070	2910		9880	3580	9540		9930	2560	3300		9580	1760	8680
10240	2880	1600		10300	2140	8590		10240	2150	2570		9910	3580	9260		9990	3190	1270		9460	3240	9900
10220	2950	1530		10220	2110	8260		10180	2330	2420		9870	3650	9730		9920	3490	1180		9560	1820	9600
10220	3120	1500		10230	2120	8320		10200	2370	2230		9870	3680	9830		9850	4010	1020		9540	2080	9810
10210	3260	1490		10240	2180	8380		10020	3600	1660		9850	3680	9470		9760	4320	1980		9520	2560	10210
10190	3300	1470		10330	1740	8280		9770	5320	1500		9850	3680	9400		9760	4340	1980		9460	3030	10470
10190	3340	1440		10240	2050	8390		10250	1970	3000		9870	3800	9120		9690	4790	1730		8960	6510	8910
10190	3360	1430		10300	2100	8570		10280	2000	2810		9870	3850	9130		9740	4870	1140		9390	3500	9930
10160	3470	1370		10350	2180	8710		10210	2040	3080		9820	3900	10010		9730	4280	1710		9610	860	6630
10260	2780	1710		10320	2210	8650		10270	2040	2590		9790	4130	10060		9910	3380	2160		9340	3720	9980
10190	3320	1450		10220	2150	8320		10230	2080	2840		10250	2070	8590		9870	3500	1960		8940	6020	10000
10200	3070	1490		10330	1720	8310		10220	2210	2510		10200	2280	9240		9760	4040	1790		9360	3420	10120
10200	2990	1510		10320	1730	8260		10210	2240	2470		10170	2340	8880		9890	3400	2030		8940	6210	9670
10190	3030	1500		10370	2090	8730		10170	2240	2590		9900	3440	9530		9840	3700	1980		9330	3590	10540
10200	3040	1500		10310	2150	8640		10220	2250	2240		9900	3530	9310		9820	3890	2100		8940	6200	9690
10210	3090	1480		10320	2210	8660		10180	2260	2710		9880	3650	9880		9730	4120	1800		9530	1760	9570
10340	2360	2070		10220	2130	8310		10180	2290	2370		9860	3660	9610		9960	1330	3360		9520	1860	9640
10240	2750	1690		10220	2150	8330		10100	2360	3050		9850	3700	9610		9860	3430	1910		9530	1750	9570
10230	2790	1660		10310	2240	8640		10150	2330	2820		9830	3850	9740		9840	3510	1850		9330	3580	9960
10230	2840	1610		10230	2210	8380		9950	3340	2280		10250	2130	8630		9730	4190	1640		9250	4040	10550
10220	2870	1730		10230	2240	8410		9930	3410	2310		10150	2300	9460		9720	4220	1810		8870	6460	9220
10150	3440	1360		10320	1870	8460		9940	3640	1830		10160	2320	9320		9710	4330	1590		9160	4630	10070
10240	2740	1690		10340	1910	8580		9960	3720	1700		9900	3390	9370		10080	2630	1510		8870	6460	9230
10240	2740	1700		10370	2100	8730		9940	3970	1620		9950	3390	9020		9870	3510	2210		9470	1860	9680
10230	2770	1640		10370	2160	8750		9890	3990	1790		9920	3410	9230		9780	3820	1770		9450	2120	9940
10220	2810	1610		10250	2160	8510		10240	2050	2760		9950	3420	9070		9740	4170	1970		9420	2600	10290
10220	2840	1600		10220	2120	8260		10220	2110	2580		9890	3590	9240		9710	4400	1850		9370	3180	9810
10170	2970	1480		10220	2160	8330		10210	2130	2800		9840	3810	10150		9750	4450	2010		9160	4460	10650
10170	3020	1490		10220	2180	8340		10210	2150	2560		9800	4040	10050		9840	3590	2150		8870	6400	9320
10210	2800	1600		10310	2250	8650		10190	2160	2870		10090	2510	9420		9710	4410	1810		9470	1870	9680
10220	2810	1600		10230	2220	8400		10220	2160	2660		9930	3250	9570		9710	4560	1940		8870	6370	9310
10210	2850	1570		10320	1780	8400		10210	2200	2810		9900	3490	9860		9700	4900	1100		8870	6380	9300
10150	3370	1380		10330	1900	8530		10200	2200	2720		9880	3580	9860		9880	2630	3330		9310	3480	10040
10200	2780	1610		10360	1930	8610		10160	2210	2860		9910	3580	9120		9880	2640	3320		8940	5480	9570
10160	3070	1450		10350	1970	8670		10200	2200	2270		9840	3650	9530		9950	3260	1220		9300	3420	9930
10160	3280	1430		10290	1990	8540		10180	2320	2570		9820	3800	9400		9790	3690	1900		9200	4070	10560
10150	3300	1430		10360	2120	8730		10170	2310	2380		9810	3930	10100		9790	3950	2070		9100	4780	9770
10150	3340	1410		10240	2000	8190		10190	2370	2160		9550	5210	10240		10080	2640	1490		8870	5960	9080
10110	3430	1330		10360	2180	8740		10140	2380	2250		9920	3290	9340		9890	3330	2230		9370	2550	10290
10190	2880	1750		10320	2270	8680		9970	3220	2350		9910	3320	9550		9880	3460	2200		9250	3650	10060
10160	3040	1450		10220	2190	8340		9950	3280	2430		9830	3680	9540		9860	3660	1090		9010	4500	7040
10160	3050	1450		10350	1730	8430		10030	3300	1810		10240	2080	8680		9800	3720	2160		9090	4710	10050
10110	3430	1320		10330	1720	8340		9930	3370	2180		10160	2210	8540		9760	3830	1740		8730	5810	8060
10110	3450	1320		10320	1810	8430		9890	3620	2330		10150	2400	8900		10120	1820	2220		9480	810	6500
10100	3500	1300		10350	1900	8600		10230	1990	3030		9900	3330	9580		9960	3180	2210		9380	1680	9590
10200	2740	1640		10350	1930	8610		10200	2070	3060		9900	3440	9790		9930	3170	2210		9220	3490	9970
10190	2800	1550		10270	2060	8490		10250	2050	2610		9860	3640	9330		9820	3520	1850		9210	3530	10000
10130	3630	1800		10330	2250	8710		10230	2130	2670		9840	3710	9930		9720	4100	1750		9340	2000	9890
10020	4710	1650		10330	2260	8700		10190	2190	2880		9850	3840	9150		9870	1820	3840		9180	3830	10020
10210	1820	3310		10340	1730	8420		10210	2190	2370		9800	3870	9550		9830	3480	1880		9190	3610	10030
10180	2770	1540		10310	1830	8430		10170	2240	2870		10160	2240	9380		9780	3700	1880		8770	5640	9840
10160	2830	1510		10280	1850	8300		10160	2250	2860		10160	2200	8420		9750	3900	2000		9180	3520	10030
10230	1980	3140		10370	1950	8650		10190	2240	2510		10130	2350	9460		9680	4230	1690		9030	4440	10680
10250	2060	2890		10260	2080	8480		10180	2240	2420		9920	3450	9170		9700	4260	1830		9380	1070	8880
10190	2710	1620		10360	1960	8650		10180	2290	2490		9910	3430	9050		9690	4370	1800		9380	1070	8880
10180	2780	1550		10230	1990	8320		10200	2290	2250		9860	3620	9990		9650	4870	1740		8600	6570	8360
10170	2780	1520		10320	2270	8710		10190	2340	2360		9850	3600	9470		9890	3200	2210		8680	6490	9550
10150	2910	1490		10330	2270	8720		10140	2370	2790		9830	3940	9160		9800	3630	1900		9290	1680	9610
10250	2070	2930		10310	2290	8690		9940	3320	2230		10170	2240	9360		9770	3690	1770		9260	1940	9870
10170	2780	1520		10300	2300	8670		9990	3550	1640		10180	2250	8850		9760	3700	1840		9120	3350	10680
10260	1950	3020		10210	2230	8360		9970	3750	1580		9930	3220	9280		9750	3770	1740		8930	4660	10700
10290	1980	2770		10330	1690	8280		10230	2030	2710		9790	3900	10050		9720	4100	2070		9140	3130	10640
10270	2070	2840		10320	1700	8270		10240	2070	2720		9770	4010	10100		9680	4720	2080		9070	3950	10590
10170	2770	1550		10330	1790	8450		10180	2160	2960		9740	4160	10010		9650	4690	1820		8600	6840	8940
10160	2790	1520		10280	2030	8540		10220	2140	2540		10220	2170	8810		10020	2860	1390		9120	3370	10170
10150	2800	1500		10210	2120	8230		10190	2180	2700		10170	2220	9320		10020	2870	1380		9050	4090	10080
10160	2950	1710		10290	1810	8200		10150	2270	2890		10190	2220	9290		9880	3230	2070		9280	530	7780
10130	2940	1450		10290	1820	8170		10170	2270	2470		9840	3550	9460		9710	4000	1750		9040	4200	10120
10230	1980	3050		10370	1980	8700		10140	2310	2760		9830	3590	9650		9700	4120	1780		9040	3980	10600
10220	2020	3110		10250	2050	8470		10120	2360	2890		9840	3620	9260		9700	4240	1710		9040	3650	10700
10280	2010	2870		10250	2330	8530		10140	2350	2690		10170	2230	8820		9700	4330	2020		9340	800	6280
10190	2660	1630		10320	1710	8270		10160	2370	2330		10110	2380	9370		9670	4370	1730		9290	1090	8980
10180	2680	1610		10350	1950	8630		10190	2410	2090		9910	3380	9190		9670	4560	1900		8630	6520	9440
10140	2870	1490		10310	1930	8530		9920	3670	1850		9860	3630	10050		9670	4510	1820		9220	1680	9650
10300	1900	2660		10300	2060	8620		10100	2300	2980		9850	3720	9170		9640	4470	1730		9050	3880	10080
10300	2020	2510		10250	2030	8480		10140	2300	2860		9830	3770	8690		9670	5090	1160		8910	4550	10720
10260	2120	2730		10210	2060	8200		10170	2300	2700		9800	3920	8670		9870	3260	2130		9110	3020	10630
10240	2190	2420		10200	2100	8210		10130	2340	2730		9780	3980	10050		9710	3930	1720		9050	3940	10090
10180	2630	1600		10230	2180	8510		10150	2320	2300		10140	2220	8570		9710	3950	1700		9050	3780	10060
10190	2650	1620		10200	2220	8350		10190	2340	2300		10140	2290	8580		9680	4110	1650		9330	750	6280
10140	2770	1510		10370	1810	8620		10180	2390	2250		10130	2330	8820		9670	4210	1640		9040	3820	10150
10210	1660	3410		10310	1730	8240		10280	1890	2850		10030	2580	9660		9670	4610	2050		9030	3740	10120
10180	1800	3300		10290	1800	8200		10270	1970	2610		10040	2570	9600		9820	3360	1850		9020	3860	10160
10240	1890	3070		10370	2020	8720		10190	2140	2760		10030	2590	9420		10090	1180	2980		9310	770	6250
10220	1990	3110		10300	2090	8650		10130	2320	2850		9910	3300	9160		9810	3370	1880		9310	620	6390
10270	1960	2740		10210	2050	8140		9940	3290	2380		9870	3330	9440		9860	3140	2040		8950	4330	10130
10250	2000	2930		10330	2270	8750		9930	3960	1410		9860	3490	9850		9620	4330	1630		8490	6890	8990
10260	2140	2700		10320	2280	8740		10230	1940	3050		9860	3550	9850		9630	4730	2000		8470	6930	8850
10270	2140	2500		10190	2190	8260		10260	1970	2650		9850	3560	9360		9990	2490	2350		8460	6920	8880
10200	2580	1650		10370	1800	8610		10240	2000	2880		9790	3790	9720		9760	3570	1780		9010	3630	10060
10190	2620	1630		10370	1810	8620		10270	2000	2550		9770	3940	10080		9720	3740	1720		8730	5140	10060
10140	2820	1500		10350	1870	8570		10240	2010	2940		9750	4040	10050		9740	3790	2200		9240	1390	8050
10120	2940	1440		10320	1890	8530		10220	2020	2940		9760	4100	9550		9640	4320	1690		8880	4580	10100
10200	1680	3350		10260	1860	8140		10220	2070	2710		10110	2290	9470		9740	3640	1710		8860	4640	10140
10210	1730	3210		10220	2030	8160		10220	2080	2780		10050	2450	9530		9710	3810	1720		8550	6610	9580
10260	2010	2960		10320	2310	8720		10200	2140	2470		10050	2480	9500		9630	4340	1680		9170	1180	9180
10260	2020	2760		10310	2320	8710		10200	2170	2300		10100	2370	8680		9600	4790	1860		8960	3890	10080
10290	2000	2560		10330	1680	8340		10160	2220	2850		9920	3390	8970		9720	3720	1680		8550	6610	9580
10250	2050	2720		10330	1690	8290		10190	2250	2310		9890	3490	8770		9690	3980	1620		8900	4410	10140
10280	2070	2610		10370	1810	8610		10180	2270	2230		9860	3550	8670		9630	4350	1710		8560	5890	10280
10160	2100	2740		10360	1990	8700		10150	2350	2810		9850	3620	9130		9760	3580	1760		8410	6970	8810
10190	2580	1630		10370	2040	8750		10140	2320	2470		9780	3770	9490		9680	3880	1710		8910	3900	10690
10130	2900	1450		10360	2060	8750		10150	2320	2220		10030	2550	9510		9680	4000	1610		9260	690	6260
10230	1600	3400		10220	2010	8360		10140	2340	2480		10010	2720	9730		9870	1090	3520		8400	6940	8940
10200	1660	3330		10230	2110	8510		10160	2620	1820		9850	3520	9280		9830	3190	2010		9030	3180	9980
10310	1950	2690		10180	2130	8170		10080	3090	1840		9870	3550	9150		9730	3600	1790		8940	3780	10210
10260	2050	2790		10310	2320	8710		9940	3260	2220		9780	3790	10130		9670	4030	1710		8760	4760	10710
10250	2130	2600		10250	2340	8560		9910	3360	2290		9780	3850	9940		9610	4460	1650		8950	3800	10100
10200	1600	3400		10320	1690	8230		9980	3430	1680		10180	2190	8910		10030	2320	1630		8920	3940	10120
10210	1670	3260		10320	1710	8260		9990	3510	1690		10100	2300	9420		9590	5400	1300		8880	4190	10150
10210	1860	3150		10320	1720	8250		9870	3590	2390		10070	2370	9460		9860	2300	2940		8920	3950	10110
10210	1970	3090		10370	1810	8610		9960	3700	1680		10080	2380	8580		9600	5110	1120		8500	6640	9610
10300	1950	2690		10320	2300	8760		9920	4220	1320		10020	2540	9480		10030	2290	1670		9070	1870	9880
10290	1960	2680		10320	2300	8750		9740	4350	1950		9920	3290	8920		10030	2330	1610		8490	6640	9610
10230	2010	2960		10190	2240	8290		10210	1960	3100		9860	3360	9500		10020	2340	1610		8380	6960	8900
10220	2000	2900		10250	2360	8570		10250	1970	2640		9840	3610	8690		9640	4140	1560		9160	660	8220
10250	1990	2820		10240	2350	8520		10220	2040	2690		9770	3830	9450		9620	4250	1670		8830	4360	10640
10250	2040	2900		10350	1700	8530		10220	2060	2800		9760	3900	9750		9550	4800	1810		9080	1490	9550
10270	2010	2620		10310	1710	8220		10210	2100	2680		9710	4280	9580		9530	4860	1770		8750	4820	10050
10260	2020	2710		10360	1820	8600		10200	2130	2720		10080	2330	9400		9430	6000	2080		8900	3870	10230
10160	2140	3180		10290	1790	8210		10190	2140	2640		10070	2400	9470		9930	1080	4230		8760	4750	10180
10240	2090	2600		10310	1910	8530		10180	2200	2360		10100	2320	8660		10020	2390	1570		9120	830	8550
10220	2230	2630		10320	2300	8750		10190	2260	2190		10070	2330	8550		9650	4070	1700		8990	2020	10040
10250	2220	2340		10360	1730	8580		10150	2280	2750		10020	2560	9700		9590	4640	910		8870	3810	10070
10130	2810	1490		10360	1730	8550		10190	2300	2230		9880	3510	9100		9580	5070	1070		8820	4080	10650
10190	1690	3260		10330	1690	8380		10180	2330	2180		9850	3640	9100		9590	5240	1200		8840	4130	10130
10210	1780	3160		10360	1820	8600		10140	2710	1920		9780	3730	9780		9530	5630	1520		8740	4690	10150
10180	1850	3190		10300	1790	8340		9970	3170	2300		9770	3810	9490		9930	1100	4260		8960	2830	9940
10170	1950	3180		10200	2040	8290		9940	3270	2620		9770	3870	9400		9560	4690	1730		8930	3040	9970
10210	1950	3060		10330	1680	8330		9940	3740	1640		10080	2310	9550		9560	4720	1760		8290	7010	8840
10290	1980	2580		10350	1770	8580		9920	3830	1620		10150	2270	8880		9540	4800	1750		8470	5740	10370
10200	2090	3040		10330	1910	8600		9730	4300	1870		10120	2280	8760		9570	5080	1070		8390	6740	9610
10200	2080	2930		10300	1920	8500		10260	1950	2730		10090	2380	9230		9780	3280	1900		8970	1790	9860
10260	2090	2560		10270	1860	8150		10260	1970	2530		10080	2370	8720		9760	3410	1780		8260	7010	8810
10250	2130	2580		10280	1930	8450		10170	2030	3180		9840	3450	9890		9730	3570	1730		8970	1790	9860
10240	2260	2350		10350	2060	8730		10200	2080	2590		9830	3460	9320		9690	3780	1640		8780	4280	10120
10220	2290	2450		10300	2360	8740		10190	2100	2510		9770	3810	9900		9670	3890	1620		8780	4330	10110
9980	4640	1480		10180	2260	8280		10210	2100	2340		9740	4000	10150		9640	3990	1670		8700	4550	10710
10210	1700	3220		10340	1640	8460		10190	2100	2640		10180	2100	8660		9640	4030	1680		8810	3870	10160
10190	1750	3260		10350	1710	8570		10190	2100	2810		10100	2210	8380		9560	4670	1710		8390	6690	9710
10200	1840	3180		10320	1690	8370		10210	2140	2310		10110	2340	9070		9800	3120	2030		8260	6950	8500
10190	1820	3100		10320	1680	8340		10180	2150	2410		10100	2330	8750		9810	3140	1980		8960	1790	9870
10230	1920	2990		10350	1790	8590		10190	2160	2500		10080	2420	9180		9770	3310	1800		8830	3900	10140
10230	1960	2980		10350	1820	8590		10190	2170	2450		10020	2520	9430		9830	1190	3490		8760	4280	10160
10210	2060	3040		10270	1960	8480		10200	2170	2350		9900	3300	8940		9870	2850	2160		8370	6120	9620
10220	2090	2920		10200	2020	8300		10190	2190	2360		9840	3370	9660		9770	3250	1910		8790	4050	10170
10240	2060	2750		10210	2020	8130		10170	2220	2380		9860	3410	9910		9600	4240	1630		8700	4570	10150
10170	2570	1640		10200	2100	8420		10180	2270	2150		9860	3370	9270		9570	4470	1600		8780	4110	10140
10180	2580	1610		10180	2100	8300		10140	2510	2050		9810	3540	9760		9990	2250	1660		8970	1220	9260
10180	2580	1610		10230	2380	8530		10150	2530	1980		9770	3690	9600		9990	2250	1660		8610	4740	10740
10190	1700	3290		10340	1670	8510		9980	3150	2260		10160	2040	8350		9660	3870	1610		8350	6190	10170
10200	1850	3110		10350	1700	8570		9960	3190	2400		10100	2270	9430		9650	4260	2210		8970	1210	9250
10210	1890	3070		10360	1720	8580		9910	3370	2360		10140	2220	9100		9640	3950	1660		9020	860	8710
10280	1920	2610		10360	1760	8600		9930	3800	1560		10080	2330	8670		9600	4100	1660		8760	3290	10760
10260	1960	2840		10210	1970	8260		9930	3870	1360		10080	2360	9070		9610	4120	1590		8740	3570	10750
10240	1980	2900		10340	2260	8830		9790	4190	1810		9850	3370	9720		9860	1060	3380		8480	5290	10010
10270	1980	2680		10170	2200	8220		9770	4220	1910		9790	3640	9780		9780	3140	2010		8970	1190	9250
10210	2050	3040		10170	2200	8220		9760	4240	1890		9780	3740	9350		9650	3800	1670		8630	4590	10730
10250	2010	2790		10170	2220	8240		9740	4370	1890		9760	3830	10100		9610	4060	1630		8730	3830	10200
10250	2040	2750		10170	2220	8240		9680	5530	1600		9760	3840	9890		9570	4360	1560		8160	6920	8390
10250	2070	2880		10220	2380	8530		10290	1800	2810		9710	4140	9740		9550	4560	1690		8780	2900	10640
10230	2080	2820		10290	1780	8190		10250	1980	2770		10030	2370	9510		9870	800	3610		8850	2500	9840
10160	1860	3250		10370	2040	8800		10200	2070	2770		10100	2300	9120		9980	2000	1930		8710	3510	10750
10150	1870	3210		10170	2230	8240		10170	2090	2950		10100	2320	9160		9850	2830	2220		8330	5970	10310
10130	1950	3320		10360	1760	8620		10160	2190	2440		10090	2320	8820		9800	3070	2020		8660	4230	10180
10120	2030	3300		10360	1770	8630		10160	2230	2640		10050	2430	9180		9690	3630	1630		8670	4260	10180
10220	1980	2960		10280	1810	8170		10120	2270	2930		9880	3230	9680		9620	3970	1630		8660	4140	10200
10180	2040	2980		10370	2010	8790		10170	2240	2280		9890	3190	9270		9530	5410	1230		8650	4190	10250
10160	2080	3150		10370	2160	8890		10150	2250	2410		9800	3570	9320		9740	3290	1880		8520	4840	6330
10240	2010	2690		10190	2110	8150		10170	2300	2240		9760	3860	10040		9490	4830	1770		8660	4150	10260
10190	2080	3000		10330	2310	8820		10110	2330	2920		9730	3980	9560		9380	6070	2060		8620	4430	10160
10210	2080	2870		10170	2290	8300		10120	2320	2710		10100	2320	9190		9900	1000	3300		8660	4150	10150
10240	2080	2720		10280	2400	8700		10110	2350	2800		10030	2490	9110		9650	3650	1700		8580	4610	10130
10150	2150	3070		10180	2350	8370		10140	2370	2300		9850	3330	9870		9890	990	3310		8190	6900	9270
10180	2150	2970		10220	2410	8520		10160	2560	1930		9760	3770	10090		9850	1050	3380		8190	6900	9290
10200	2160	2840		10320	1620	8360		9920	3330	2330		9790	3710	9310		9850	2900	1980		8620	3840	10740
10200	2220	2770		10330	1660	8470		9780	4200	1830		9790	3710	8700		9700	3520	1690		8690	3900	10150
10170	1710	3360		10350	1730	8600		9760	4230	1940		9740	3870	9530		9520	4550	1590		8250	6310	10120
10170	1800	3140		10350	1740	8630		9720	4320	1830		10160	2110	8640		9850	920	3880		8170	6900	9260
10220	1910	3030		10350	1790	8640		9720	4380	1970		10160	2140	8950		9690	3530	1690		8920	830	8730
10190	1950	3120		10360	1800	8670		9710	4410	1940		10060	2290	9520		9560	4310	1520		8640	4120	10160
10280	1940	2720		10360	1830	8690		10230	1920	2760		10050	2320	9470		9540	4440	1550		8660	3910	10140
10280	1930	2500		10300	1720	8230		10220	2030	2920		10100	2330	9060		9490	4670	1640		8530	4640	10120
10230	2040	2660		10320	1850	8600		10180	2090	2720		10000	2470	9640		9780	3000	2450		8460	4930	6380
10240	2050	2620		10360	1950	8740		10180	2110	2570		10100	2310	8940		9660	3690	1610		8150	6920	9270
10170	2100	2820		10360	1960	8760		10170	2120	2500		10060	2320	8540		9620	3980	1540		8960	1060	7760
10210	2120	2900		10350	1990	8760		10160	2170	2870		10050	2390	8840		9600	4040	1540		8150	6930	9300
10220	2120	2770		10280	1960	8520		10160	2180	2490		9940	2720	9640		9550	4390	1640		8150	6920	9270
10230	2110	2610		10220	1950	8260		10140	2240	2990		9910	3100	8950		9530	4420	1540		8080	7070	8630
10210	2140	2740		10190	2090	8120		10120	2260	2960		9880	3180	9270		9570	4150	1590		8630	3330	10730
10190	1590	3430		10180	2120	8130		10120	2230	2350		9840	3320	9690		9710	3380	1810		8140	6940	9280
10180	1590	3350		10180	2110	8140		10140	2290	2380		9820	3350	9680		9630	3760	1650		8720	2530	10490
10120	1860	3380		10170	2290	8280		10110	2320	2400		9870	3360	9050		9760	3110	1880		8830	1190	9320
10220	1870	3060		10170	2300	8290		10130	2340	2370		9800	3480	9720		9610	3920	1590		8160	6920	9500
10270	1920	2740		10270	2410	8700		10100	2380	2820		9790	3620	9980		9490	5270	1120		8830	1150	9250
10270	1920	2560		10180	2350	8360		10170	2440	2020		9760	3600	9570		9670	3880	1230		8530	4390	10140
10200	1970	2910		10350	1800	8650		9910	3390	2260		9820	3620	9100		9530	4410	1510		8500	4580	10140
10270	1940	2640		10360	1810	8670		9890	3400	2200		9790	3710	8670		9480	4630	1620		8110	6660	8110
10150	2010	3150		10330	1800	8580		9890	3440	2370		9760	3790	10080		9630	3820	1600		8050	7030	8490
10250	1960	2710		10360	1840	8680		9880	3440	2320		9800	3730	9110		9760	2890	2570		8560	3800	10740
10260	1990	2700		10360	1880	8710		9800	3980	1970		9780	3770	9240		9760	3020	1980		8060	7100	8950
10270	1990	2500		10360	1900	8740		9780	4080	1960		9730	3800	9730		9640	3650	1650		8740	1910	10070
10240	2030	2520		10360	1900	8740		9790	4150	1800		9760	3870	8790		9550	4220	1510		8420	4910	10130
10160	2130	3110		10350	1910	8720		9720	4320	1900		9720	3970	10120		9540	4300	1610		8540	4290	10170
10220	2060	2660		10360	1940	8760		10200	1910	3180		9690	4120	9750		9500	4520	1570		8190	6170	10200
10180	2130	2910		10350	1940	8730		10200	2020	2850		10070	2370	9160		9470	5300	1110		8030	7110	8890
10250	2070	2560		10360	1970	8770		10210	2030	2660		10060	2330	8610		9360	5480	2190		8690	1950	10110
10250	2070	2490		10360	1990	8780		10160	2070	3070		10060	2370	8930		9600	3860	1590		8550	3990	10130
10200	2130	2880		10370	2170	8890		10160	2160	2470		9960	2650	9510		9500	4490	1550		8710	1780	9960
10230	2120	2560		10200	2040	8110		10160	2190	2530		9870	3250	9200		9380	5140	1800		8490	4380	10170
10230	2130	2420		10320	2340	8820		10180	2240	2200		9830	3440	9240		9350	5520	2200		8010	7120	8860
10150	2170	2570		10160	2270	8250		10080	2330	2980		9850	3450	8650		9610	3710	1660		8490	4250	10150
10210	2160	2460		10160	2310	8290		10160	2300	2210		9740	3660	9550		9600	3820	1610		8370	4910	10070
10140	2640	1540		10170	2360	8370		10140	2320	2330		10210	2030	8870		9360	5430	2140		8360	4940	10060
10000	4600	1980		10350	1720	8620		10070	2370	3030		10130	2030	8410		9670	3400	1770		8350	4970	10040
10160	1640	3430		10350	1760	8640		10070	2380	2990		10070	2220	9500		9320	6080	1990		8270	5270	10060
10150	1630	3400		10360	1840	8690		10140	2370	2190		9780	3500	9570		9760	2990	2020		8510	3840	10320
10180	1660	3280		10360	1850	8700		10080	2360	2230		9770	3510	9410		9550	4070	1570		8500	4050	10160
10170	1760	3210		10360	1850	8690		10060	2420	3020		9840	3540	9070		9530	4220	1580		8440	4340	10150
10170	1770	3180		10360	1860	8690		10160	2480	2000		9730	3820	9560		9720	3090	1900		8440	4230	10710
10130	1830	3400		10360	1910	8750		9900	3270	2300		9720	3900	10100		9410	4810	1600		8390	4670	10090
10140	1970	3190		10320	1910	8620		9900	3340	2610		9670	4460	9530		9620	4110	860		8460	4310	10170
10170	1980	3100		10270	1840	8140		9900	3330	2370		10040	2360	9260		9450	4870	920		8410	4450	10200
10260	1950	2800		10250	1890	8360		9880	3440	2300		9820	3260	9630		9720	3100	1830		8430	4350	10210
10230	2010	2810		10300	1960	8620		9920	3720	1620		9870	3250	9060		9680	3230	1820		8400	4430	10180
10180	2050	3000		10230	1910	8270		9920	3860	1380		9860	3300	9180		9530	4100	1560		7990	7030	9340
10190	2060	2940		10360	2230	8880		9820	3930	1880		9870	3330	8760		9470	4460	1510		8490	2980	10730
10200	2180	2710		10160	2110	8230		9820	3960	1910		9790	3500	9390		9820	960	4470		8330	4760	10090
10190	2230	2560		10340	2300	8860		9810	4000	1860		9780	3620	10020		9500	4560	870		7920	7100	8540
10120	1760	3380		10160	2320	8290		9800	4050	1950		9760	3620	9900		9320	5300	1930		8480	3910	10170
10130	1830	3220		10160	2320	8300		9770	4080	1980		9820	3560	9100		9420	5450	1190		8260	5060	9980
10180	1930	3080		10170	2340	8320		9790	4080	1880		9680	4470	9430		9790	2730	1860		8470	2990	10730
10270	1890	2670		10200	2410	8480		9790	4090	1920		10040	2380	8760		9620	4050	890		8420	4120	10130
10270	1910	2680		10330	1680	8570		9790	4150	1930		9950	2590	9600		9400	5640	1340		8470	2930	10580
10260	1930	2700		10360	1850	8710		9730	4230	2000		9930	2640	9630		9420	5400	1150		8300	4710	10110
10210	1980	2980		10360	1860	8720		9710	4330	1980		9850	3390	9070		9780	2760	1810		8210	5140	10060
10220	1990	2930		10330	1840	8600		9650	4570	1900		9780	3470	9440		9640	3350	1770		8320	4600	10170
10220	2040	2760		10280	1820	8160		10270	1790	3000		9780	3520	9350		9650	3400	1680		8570	1680	9920
10150	2120	3060		10310	1940	8610		10220	1810	3140		9810	3590	9140		9630	3540	1630		8500	2490	10520
10240	2070	2800		10180	2020	8200		10240	1850	2880		9750	3670	9950		9550	3940	1500		8290	4780	10040
10160	2150	3100		10190	2060	8110		10260	1870	2830		10010	2410	9320		9540	3970	1540		8370	3670	10730
10210	2070	2690		10180	2390	8410		10230	1880	2900		10060	2350	8860		9470	4450	1550		8350	4310	10280
10200	2110	2850		10310	1640	8340		10260	1890	2780		9970	2490	9520		9450	4500	1560		8740	400	7690
10180	2160	2930		10350	1770	8680		10220	2010	2660		9970	2460	9450		9710	3070	1820		8340	4380	10160
10230	2100	2410		10210	1960	8170		10190	2070	2700		9860	3290	8920		9680	3230	1730		7860	7060	8420
10230	2110	2460		10310	1610	8300		10180	2070	2520		9790	3390	9580		9580	3690	1630		8300	4610	10060
10190	2210	2630		10350	1850	8730		10170	2120	2410		9840	3390	9170		9560	3860	1560		8330	4380	10290
10170	2210	2600		10320	1840	8590		10190	2130	2370		9780	3510	9380		9470	4390	1530		8350	4360	10220
10210	2250	2210		10350	1890	8710		10160	2130	2620		9760	3540	9400		9330	5150	1710		7840	7040	8360
10170	2300	2590		10310	1910	8620		10170	2150	2360		9790	3690	9090		9600	3530	1680		8220	5090	6890
10120	2750	1770		10250	1880	8110		10150	2160	2390		9690	3890	9630		9580	3770	1560		8320	4280	10170
10110	1810	3410		10240	1890	8100		10140	2180	2620		9680	4040	10040		9550	3820	1560		7850	7010	8320
10180	1910	3090		10250	1960	8480		10180	2210	2230		9680	4070	9770		9600	4050	880		8340	4130	10160
10270	1920	2510		10160	2120	8340		10150	2220	2350		10140	2180	9050		9540	3960	1530		8300	4380	10240
10250	1980	2880		10170	2110	8100		10150	2230	2620		9990	2360	9520		9450	4710	830		8310	4360	10250
10250	1960	2610		10310	1610	8300		10140	2240	2440		10010	2380	9310		9260	5410	1890		8270	4560	10140
10250	1960	2570		10280	1960	8570		10170	2300	2140		9980	2430	9390		9270	5610	2290		8170	5090	10670
10230	2000	2840		10260	1970	8530		10160	2420	1990		9950	2530	9670		9700	3050	1810		7810	7190	8680
10250	1990	2610		10200	2180	8570		9900	3330	2420		9910	2770	9710		9690	3120	1850		8310	4240	10140
10200	2050	2960		10160	2170	8140		9910	3360	2060		9760	3430	9540		9540	3840	1530		8240	4640	10140
10220	2030	2820		10310	2390	8840		9860	3460	2380		9820	3480	8700		9500	4130	1510		8220	4820	10110
10230	2060	2900		10300	1630	8180		9940	3770	1400		9830	3490	8910		9260	5610	2210		8660	460	7910
10160	2100	3010		10320	1690	8540		9820	3890	2730		9740	3610	9640		9680	3240	1740		8270	4230	10750
10210	2080	2740		10340	1760	8670		9810	3940	1930		9790	3640	8690		9390	5120	2590		8190	4810	10080
10200	2140	2980		10310	1830	8580		9800	4070	1940		9660	4170	9700		9260	5670	2230		8270	4320	10180
10230	2110	2740		10230	1900	8230		9810	4100	1820		10060	2180	9520		9690	3120	1770		8270	4340	10270
10230	2110	2570		10280	1970	8600		9740	4170	1960		10040	2250	9440		9630	3370	1740		8190	4830	10130
10160	2220	2920		10150	2190	8150		9740	4280	1830		9950	2490	9460		9600	3460	1660		8240	4500	10130
10190	2360	2280		10150	2380	8320		9720	4340	1840		9940	2550	9450		9590	3680	1600		8190	4830	10110
10040	3450	2410		10300	1520	8350		9680	4440	1910		9930	2600	9520		9560	3760	1600		8280	4150	10360
10160	1560	3390		10340	1780	8680		9660	4440	1890		9910	2730	9710		9490	4120	1530		8220	4560	10090
10150	1670	3330		10320	1940	8700		9680	4460	1950		9760	3630	10050		9780	2580	1940		8650	1060	7620
10150	1730	3300		10300	1930	8630		9680	4510	1940		9750	3640	10010		9480	4240	1490		8220	3960	10760
10140	1790	3240		10250	1860	8120		9690	4840	1550		10000	2320	9430		9420	4600	1590		8230	4440	10250
10180	1840	3140		10250	1860	8120		10230	1800	3200		10030	2340	9270		9710	2930	1910		8160	4960	10050
10140	1870	3230		10360	2080	8920		10210	1910	2970		10040	2310	8820		9430	4370	1520		8150	4980	10040
10120	1960	3260		10250	1990	8550		10220	2000	2650		9910	2630	9540		9260	5360	1870		8650	1120	7660
10180	1990	3060		10250	1970	8520		10190	2020	2600		9900	2680	9670		9710	3340	1080		8230	4400	10250
10170	2000	3020		10360	2120	8940		10190	2060	2310		9840	3350	9100		9610	3380	1720		8220	4450	10280
10230	1950	2640		10160	2130	8370		10170	2100	2490		9760	3610	10100		9430	4420	1480		8260	4130	10110
10230	1990	2880		10150	2180	8110		10140	2180	2470		9740	3700	10100		9390	4640	1520		8210	4480	10210
10260	1940	2480		10140	2230	8180		10160	2190	2410		9690	3810	9720		9400	4780	880		8100	5150	9990
10150	2040	3080		10150	2240	8190		10090	2340	2910		9690	3820	9640		9740	2740	1890		8240	4270	10070
10200	2040	2970		10310	1580	8160		10130	2430	2060		10070	2240	9220		9620	3300	1680		8200	4480	10270
10210	2060	2890		10310	1580	8170		10150	2550	1920		10010	2290	8340		9480	4180	1450		8180	4120	10790
10210	2040	2820		10290	1630	8250		9980	3060	2380		9740	3490	9610		9290	5280	1850		8200	4430	10130
10140	2110	3110		10350	1980	8840		9940	3190	2250		9730	3580	9440		9740	2830	1730		7780	6860	8090
10160	2100	3040		10360	2030	8890		9900	3520	1890		9710	3630	9700		9640	3230	1770		8200	4330	10250
10220	2070	2790		10340	2190	8890		9960	3560	1510		9780	3670	8950		9620	3330	1750		8190	4500	10290
10130	2140	3090		10340	2200	8910		9800	3970	1930		9680	3950	10170		9570	3640	1610		8200	4500	10080
10230	2070	2720		10350	2270	8960		9770	4100	2000		10080	2010	8180		9560	3670	1550		8210	4250	10220
10160	2130	2990		10160	2140	8110		9760	4100	1800		9980	2340	9630		9450	4510	820		8190	4280	10150
10200	2100	2660		10310	1610	8510		9770	4130	1830		10040	2340	8870		9220	5710	2200		8220	3910	10090
10210	2100	2570		10340	1760	8700		9720	4300	1930		9950	2450	9390		9680	3130	1740		8180	4300	10120
10190	2130	2770		10350	1850	8770		9750	4300	1870		9920	2530	9530		9520	3900	1550		8160	4460	10250
10150	2140	2800		10310	1840	8590		9690	4420	1990		9810	3160	9640		9680	3060	1730		8110	4820	10030
10210	2120	2660		10310	1870	8610		9670	4430	1870		9850	3220	9040		9660	3160	1720		8180	4240	10190
10090	2140	2740		10360	1980	8850		9680	4480	1970		9780	3420	10010		9640	3240	1670		8120	4760	10070
10160	2140	2720		10240	1880	8330		10270	1780	2930		9830	3350	9160		9580	3480	1660		8110	4800	10050
10160	2130	2670		10360	2040	8870		10270	1870	2830		9830	3340	9030		9490	4080	1470		8030	5280	9900
10190	2320	2290		10230	1930	8410		10220	1930	2830		9840	3390	8920		9470	4180	1460		7690	7220	9320
10160	1610	3380		10280	1980	8620		10160	2080	2930		9830	3420	8890		9450	4250	1500		8160	4350	10080
10150	1680	3450		10360	2080	8910		10150	2160	2580		9740	3460	9610		9220	5580	1970		8130	4670	10100
10140	1730	3210		10270	1980	8580		10140	2200	2900		9770	3450	9400		9660	3200	1740		8150	4520	10130
10160	1750	3190		10200	2070	8500		10150	2270	2180		9750	3440	9400		9590	3890	910		8110	4670	10080
10180	1890	3050		10350	2230	8930		10150	2340	2140		9820	3450	9100		9460	4230	1460		8100	4640	10100
10090	1970	3220		10160	2070	8190		10040	2450	2970		9800	3430	8740		9250	5360	1820		8020	5140	10050
10230	1980	2830		10370	2320	9060		10140	2530	1870		9730	3520	9550		9210	5740	2190		8610	880	6380
10140	2030	3110		10160	2140	8110		10140	2620	1850		9760	3610	10090		9730	1990	2860		8130	4490	10130
10130	2060	3150		10150	2200	8130		9910	3240	2290		9800	3560	8830		9680	2980	1850		8120	4490	10240
10210	2020	2940		10150	2210	8160		9810	3850	2680		9800	3580	9020		9510	3860	1570		8370	1480	9750
10120	2070	3160		10140	2220	8150		9790	3850	1960		9700	3660	9700		9470	4110	1470		8120	4360	10160
10190	2030	2950		10140	2250	8180		9900	3880	1400		9700	3680	9610		9340	4820	1580		8120	4550	10170
10170	2060	2990		10350	1990	8870		9820	3870	1840		9750	3860	9060		9520	3770	1560		8430	940	9040
10220	1990	2570		10360	2020	8890		9830	3900	1870		9660	4070	9770		9390	4580	1530		8130	4250	10140
10110	2150	3210		10360	2050	8910		9810	4020	1850		9660	4120	9690		9520	3750	1570		8100	4440	10160
10180	2110	2890		10270	1980	8580		9770	4150	1870		9680	4160	8820		9300	5560	1190		8120	4370	10180
10160	2090	2760		10360	2120	8960		9660	4470	1910		9660	4160	9690		9200	5720	2390		8040	4940	9980
10210	2110	2840		10220	1940	8080		9660	4510	2000		9690	4290	9130		9750	790	3400		8140	4210	10140
10150	2140	2980		10370	2260	9020		9630	4610	1880		10010	2380	9120		9670	3040	1660		8090	4500	10060
10150	2140	2910		10360	2260	8990		9640	4650	1920		9950	2460	9360		9670	3100	1690		8100	4510	10130
10130	2190	3050		10150	2240	8440		9640	4710	2010		9920	2600	9760		9600	3280	1710		8080	4630	10070
10210	2110	2680		10140	2260	8180		10170	1930	3220		9950	2500	9250		9580	3410	1620		8000	5120	10010
10100	2200	3080		10140	2290	8200		10220	1940	2570		9920	2560	9340		9400	4440	1450		8280	2570	9710
10130	2190	3040		10300	1600	8140		10140	2040	3140		9760	3350	9460		9750	780	3420		8090	4460	10220
10160	2180	2920		10350	1880	8830		10180	2130	2260		9750	3370	9550		9630	3180	1740		8090	4490	10130
10190	2130	2540		10350	1940	8850		10090	2250	3050		9800	3470	8980		9570	3430	1660		8070	4500	10210
10140	2260	3010		10350	2020	8900		10100	2340	2340		9760	3530	9350		9200	5550	1950		8100	4410	10160
10160	2210	2560		10240	1890	8350		9910	3850	1370		9740	3630	10100		9660	2970	1810		8390	920	9030
10160	2270	2670		10350	2070	8920		9870	3990	1340		9730	3740	8710		9530	3520	1630		8060	4520	10210
10190	2240	2450		10210	1930	8250		9740	4030	2050		9760	3760	8980		9490	3890	1520		8230	2320	10470
10200	2230	2340		10130	2260	8170		9760	4240	1770		9680	3890	10170		9470	3970	1520		8060	4280	10770
10170	2250	2270		10130	2280	8190		9730	4270	1920		9680	3830	9700		9360	4620	1510		8080	4320	10100
10150	2520	1960		10130	2290	8180		9660	4550	1930		9980	2340	9440		9330	4730	1530		8080	4370	10050
10170	1560	3430		10130	2300	8200		9630	4600	1960		9920	2540	9600		9680	2820	1960		8080	4460	10140
10140	1710	3300		10130	2310	8200		9650	4630	1990		9930	2550	9290		9650	3090	1760		8050	4570	10120
10120	1810	3380		10130	2320	8210		10270	1690	2900		9910	2570	9340		9580	3340	1700		8070	4340	10100
10160	1830	3120		10310	1590	8120		10210	1860	3020		9750	3400	9450		9550	3510	1620		8050	4360	10120
10150	1930	3110		10300	1610	8160		10240	1860	2830		9720	3520	9540		9570	3520	1590		8080	4400	10140
10250	1870	2610		10290	1670	8180		10240	1890	2800		9700	3590	9630		9180	5680	2030		8060	4440	10140
10110	2060	3190		10350	1900	8830		10200	1960	2860		9710	3610	9600		9170	5740	2110		8070	4480	10110
10210	2080	2580		10280	1930	8630		10210	1960	2670		9760	3610	9000		9670	2730	2060		8000	4830	10040
10190	2110	2760		10220	1890	8210		10180	2010	2620		9730	3720	9290		9630	3040	1770		8010	4860	10040
10180	2170	2970		10260	1990	8580		10180	2070	2750		9680	3830	9780		9540	3590	1570		8060	4320	10120
10200	2100	2640		10190	1960	8220		10100	2190	3050		9730	3860	9040		9530	3640	1600		8060	4380	10130
10050	2170	2720		10360	2240	9060		10130	2230	2750		9670	4310	9330		9460	4050	1500		8080	3990	10100
10190	2150	2480		10160	2080	8380		10160	2260	2130		10100	2160	9030		9350	4580	1410		8010	4720	10050
10200	2150	2320		10140	2210	8130		10150	2250	2230		10030	2180	8150		9170	5720	2040		8050	4440	10190
10140	2290	2870		10130	2230	8150		10110	2260	2330		9920	2540	9610		9630	3090	1730		8030	4530	10110
10160	2250	2390		10170	2030	8260		10130	2260	2390		9890	2610	9710		9440	4160	1480		8010	4710	10090
10180	2310	2160		10350	2220	9030		10110	2310	2450		9860	2890	9840		9160	5740	2170		8040	4450	10070
10170	2440	2080		10150	2160	8420		10150	2420	1990		9840	3230	8680		9140	5840	2250		8040	4310	10060
10160	1590	3390		10150	2230	8460		10130	2450	1990		9750	3370	9510		9170	6210	2020		8010	4570	10250
10140	1610	3390		10130	2270	8170		10130	2460	1970		9720	3470	9660		9590	2180	3690		8500	820	5750
10160	1620	3340		10290	1670	8180		10100	2450	1940		9720	3620	9930		9640	2960	1840		7960	4960	9970
10120	1710	3390		10360	2220	9100		10100	2490	2090		9710	3590	9660		9590	3210	1690		8030	4460	10170
10140	1860	3200		10360	2260	9100		10130	2540	1860		9690	3820	10170		9590	3280	1640		8020	4470	10050
10170	1910	3080		10360	2240	9040		10130	2540	1910		9720	3920	9160		9520	3650	1540		8020	4480	10100
10240	1930	2580		10300	1620	8130		10060	2620	2440		10020	2350	9130		9480	3840	1530		8000	4540	10230
10240	1960	2650		10300	1640	8160		9970	3060	2370		9790	3550	8930		9720	730	3500		7950	4950	10030
10170	2020	3020		10290	1690	8190		9910	3250	2320		9720	3600	9780		9500	3710	1580		8010	4430	10170
10230	2010	2550		10230	2010	8560		9920	3280	2070		9700	3770	10130		9440	4070	1420		8010	4240	10080
10200	2030	2610		10160	2050	8130		9900	3310	2220		9760	3690	8910		9290	4890	1550		7990	4510	10150
10160	2100	2920		10190	2250	8650		9880	3380	2510		9750	3750	9000		9150	5800	2190		7950	4810	9980
10210	2030	2370		10120	2320	8190		9880	3370	2370		9640	4020	10200		9630	3010	1770		7950	4870	10040
10210	2090	2570		10300	1660	8690		9900	3360	2060		9640	4050	10230		9610	3140	1680		7970	4560	10220
10200	2110	2510		10290	1610	8130		9870	3410	2190		9620	4180	9710		9570	3270	1670		8120	2220	10410
10190	2140	2640		10300	1610	8100		9930	3680	1500		9660	4310	9320		9510	3630	1580		7980	4600	10240
10090	2260	3140		10300	1620	8120		9830	3670	1900		10090	2140	9170		9350	4570	1430		8450	760	5750
10180	2150	2610		10260	1700	8230		9820	3710	1960		9770	3260	9800		9340	4620	1490		8370	1290	6470
10050	2170	2630		10290	1670	8160		9840	3730	1900		9820	3340	9010		9190	5340	1740		7970	4570	10180
10170	2220	2470		10280	1700	8180		9800	3840	1980		9800	3420	9000		9150	5630	1930		7950	4720	10050
10180	2260	2300		10220	1960	8480		9810	3860	1930		9800	3440	9090		9720	770	3380		7980	4370	10230
10160	1480	3550		10250	1990	8600		9780	3900	1930		9780	3510	9090		9640	2820	1910		7980	4420	10140
10140	1690	3370		10240	2000	8580		9790	3920	1970		9680	3710	9860		9550	3430	1620		7960	4450	10160
10120	1720	3450		10220	2000	8520		9810	3930	1790		10090	2110	9220		9470	3800	1560		7960	4640	10070
10150	1700	3230		10220	2030	8580		9780	4020	1930		9960	2340	9610		9440	4000	1460		7940	4950	10030
10140	1800	3200		10210	1960	8060		9770	4040	2010		9950	2320	9560		9330	4570	1500		8410	840	6720
10070	1870	3420		10350	2220	9080		9800	4020	1780		9980	2320	9320		9300	4720	1550		7950	4640	10100
10100	1990	3230		10170	2020	8210		9870	4100	1320		9870	2670	9690		9570	3330	1620		8120	2030	10290
10080	2050	3210		10350	2260	9090		9850	4110	1330		9870	2750	9760		9240	5030	1560		7950	4490	10090
10100	2040	3150		10340	2260	9030		9770	4100	1850		9780	3200	9760		9260	5470	1100		7950	4580	10160
10120	2120	3120		10160	2120	8500		9750	4150	2020		9840	3110	9000		9610	3160	1560		7680	6160	10200
10180	2050	2770		10130	2210	8080		9730	4140	2040		9810	3300	9130		9600	3130	1750		7880	5110	9990
10150	2150	3010		10120	2340	8210		9750	4200	1980		9730	3490	9840		9510	3580	1580		7970	4080	10220
10180	2100	2770		10330	2740	9070		9730	4220	1960		9710	3490	9580		9470	3860	1470		7940	4520	10060
10140	2180	2960		10350	3310	9270		9740	4240	1970		9770	3500	8710		9460	3890	1520		7940	4570	10110
10100	2180	2810		10270	1480	8360		9740	4220	1900		9680	3600	9620		9620	2920	1840		7940	4590	10100
10170	2400	2110		10290	1560	8610		9740	4230	1830		9690	3720	10120		9590	3010	1820		7870	5180	9940
10140	1600	3420		10270	1590	8340		9720	4280	1970		9680	3820	10160		9610	3260	1360		7980	3120	10760
10140	1610	3540		10300	1560	8080		9720	4340	1790		10000	2240	9540		9570	3240	1710		7960	4460	10140
10140	1670	3430		10300	1620	8110		9690	4340	1900		9940	2360	9480		9530	3330	1630		7940	3130	10760
10140	1670	3410		10300	1620	8070		9720	4350	1870		9980	2310	8130		9500	3720	1560		7610	6690	7810
10110	1690	3410		10290	1650	8130		9700	4400	1970		9910	2440	9520		9450	3910	1530		7920	4580	10270
10120	1750	3290		10280	1710	8170		9680	4390	1860		9890	2610	9280		9440	3970	1510		7920	4600	10150
10150	1810	3140		10330	1870	8850		9670	4400	1890		9860	2740	9650		9180	5340	1650		7900	4900	9920
10080	1850	3390		10270	1820	8490		9650	4510	1790		9760	3270	9460		9590	3200	1610		7910	4620	10110
10110	1840	3240		10210	1950	8060		9650	4620	2040		9790	3350	9120		9540	3310	1650		7930	4460	10180
10140	1870	3130		10270	2080	8750		9630	4620	2000		9700	3450	9630		9530	3360	1590		7920	4560	10060
10070	1910	3380		10330	2210	8970		9640	4630	1940		9780	3520	9060		9530	3400	1630		7910	4660	10070
10170	1880	3020		10180	2130	8560		9630	4770	1660		9730	3530	9270		9530	3420	1550		7900	4700	10100
10090	1930	3300		10350	2280	9090		10210	1850	2960		9690	3570	9640		9470	3830	1460		7910	4720	9980
10240	1900	2640		10150	2140	8450		10230	1870	2860		10000	2170	8110		9150	5490	1800		8290	1260	8230
10130	1970	3120		10140	2170	8470		10190	1960	2580		9910	2530	9200		9120	5750	2010		7920	4540	10180
10070	2020	3260		10120	2190	8320		10170	2020	2640		9800	3320	8930		9510	3470	1620		7900	4650	10160
10220	1980	2630		10120	2210	8050		10200	2030	2300		9800	3370	8910		9520	3480	1590		7900	4660	10120
10210	2000	2720		10120	2340	8200		10190	2030	2420		9780	3410	9140		9490	3630	1560		8240	1640	6470
10070	2120	3160		10290	1660	8140		10170	2070	2720		9740	3640	9100		9370	4300	1450		7910	4510	10100
10190	2030	2690		10270	1720	8230		10160	2100	2340		9660	3850	10050		9150	5480	1810		7910	4560	10070
10110	2160	3140		10270	1970	8650		10130	2200	2460		9640	3850	9790		9590	3120	1740		7820	5230	9910
10190	2070	2630		10240	2000	8590		10100	2310	2290		9680	4020	9050		9510	3490	1630		7910	4530	10150
10190	2090	2590		10270	2060	8730		10130	2360	2050		10050	2150	9110		9540	3360	1620		8270	610	8430
10120	2220	3010		10160	2210	8560		10150	2450	1890		10030	2190	9220		9480	3550	1590		7920	4390	10120
10120	2140	2500		10410	3150	9570		10140	2500	1910		9930	2450	9250		9430	3940	1460		7890	4660	10280
10030	2290	3180		10400	3170	9580		9870	3380	2770		9810	3250	8990		9400	4160	1450		7850	5110	9990
10150	2250	2680		10260	1370	8230		9860	3520	2760		9720	3360	9500		9120	5720	2030		7900	4470	10110
10130	1640	3360		10290	1480	8120		9910	3700	1520		9700	3500	9790		9500	3500	1580		7890	4620	10080
10070	1750	3490		10280	1550	8170		9800	3750	1940		9750	3550	8940		9270	4800	1480		7890	4560	10180
10220	1930	2770		10280	1620	8150		9900	3820	1350		9690	3700	10170		9250	4830	1440		7890	4580	10160
10210	1970	2850		10280	1700	8120		9810	3830	1900		9660	3730	9780		9110	5680	1960		7890	4590	10090
10070	2080	3240		10270	1720	8220		9790	3850	2000		9640	3830	9740		9560	3300	1560		7870	4710	10240
10080	2110	3210		10270	1720	8200		9880	3880	1340		9600	4080	10190		9500	3460	1580		7870	4000	10800
10160	2050	2910		10260	1740	8260		9840	3880	1820		9580	4270	9760		9440	3840	1510		7900	4420	10140
10200	2070	2820		10260	1970	8650		9820	3960	1820		10070	2110	9100		9340	4340	1450		7860	4720	10250
10190	2060	2580		10340	2120	9000		9760	4030	1730		9860	2540	9600		9360	4310	1410		7860	4860	10070
10190	2070	2650		10210	1950	8060		9760	4090	2060		9860	2630	9610		9090	5910	2150		7880	4590	10130
10200	2070	2380		10330	2210	9030		9840	4160	1340		9930	2480	9080		9540	3290	1610		7870	4690	10010
10160	2130	2820		10340	2300	9250		9690	4380	2050		9850	2710	9800		9500	3480	1500		8190	1570	6400
10170	2100	2540		10150	2170	8490		9670	4450	2020		9830	2820	9760		9480	3600	1510		7880	4520	10080
10140	2190	2940		10120	2230	8090		9650	4480	1810		9800	3310	8920		9330	4410	1450		7850	4810	10020
10140	2170	2650		10110	2370	8200		9640	4650	1960		9720	3370	9480		9330	4430	1390		7870	4520	10200
10190	2150	2380		10400	3140	9600		9620	4720	2000		9790	3330	8840		9520	3270	1660		7850	4510	10100
10150	2210	2780		10410	3170	9590		9610	4750	1920		9790	3340	8950		9530	3290	1630		7830	5000	9970
10180	2200	2390		10410	3180	9590		10240	1810	2690		9780	3420	8980		9450	3830	1450		7870	4500	10050
10130	2290	2770		10270	1420	8290		10200	1950	2660		9770	3440	9120		9460	4000	840		7890	4080	10090
10130	1580	3460		10300	1530	8060		10100	2100	3340		9760	3490	8880		9580	2780	1910		7860	4470	10040
10130	1610	3570		10260	1630	8360		10160	2070	2410		9740	3570	8770		9490	3520	1540		7860	4620	10000
10110	1780	3310		10270	1720	8220		10150	2080	2490		9750	3560	8990		9440	3710	1550		7860	4550	10080
10130	1780	3210		10260	1830	8460		10090	2170	3080		9720	3670	8830		9430	3820	1490		7850	4600	10090
10230	1880	2600		10330	2050	8980		10090	2200	3180		9660	3800	10090		9410	3920	1470		7870	4430	10000
10100	1990	3120		10330	2060	9000		10140	2190	2290		9620	4030	10180		9410	3940	1480		7860	4570	10020
10070	2020	3270		10250	2010	8670		10130	2190	2470		9610	4070	10240		9270	4660	1400		7840	4700	10080
10050	2090	3350		10330	2120	9020		10080	2260	2400		9600	4110	9750		9230	4870	1480		7870	4530	10010
10200	2000	2790		10250	2020	8680		10120	2280	2200		9570	4320	9780		9110	5550	1840		7860	4590	10190
10190	2010	2750		10330	2130	9040		10090	2310	2510		9350	5640	10040		9110	5570	1820		7840	4600	10190
10220	1990	2330		10200	1980	8460		9900	3240	2150		9970	2360	9020		9070	5960	2300		7840	4640	10160
10200	2030	2490		10260	2060	8730		9890	3290	2100		9870	2520	9550		9480	3420	1610		7840	4660	10040
10210	2050	2490		10320	2210	9030		9860	3400	2390		9900	2500	9210		9390	4040	1480		7830	4690	10010
10200	2050	2600		10330	2240	9070		9850	3620	1850		9850	2630	9580		9550	3070	1740		7810	4910	10110
10140	2110	2690		10110	2230	8380		9830	3650	1860		9830	2670	9640		9450	3600	1570		7820	4960	9930
10160	2120	2710		10120	2220	8080		9830	3690	1930		9850	2630	9510		9430	3730	1480		8000	1710	10010
10090	2150	2840		10110	2290	8150		9810	3680	1970		9860	2620	9430		9430	3740	1460		7830	4690	10220
10160	2140	2570		10110	2330	8180		9820	3780	1920		9840	2690	9500		9120	5370	1570		7830	4770	10040
10140	2190	2760		10240	1350	8320		9830	3790	1830		9840	3040	8730		9470	3430	1590		7820	4820	10030
10020	2310	3240		10290	1630	8700		9820	3840	1950		9800	3260	8780		9470	3550	1520		7780	5070	10110
10150	2180	2690		10300	1550	8060		9780	4060	1890		9780	3420	8910		9440	3570	1530		7850	4420	10220
10130	2200	2700		10290	1650	8090		9770	4130	1750		9760	3490	8860		9400	3890	1490		7850	4720	10030
10060	2230	2680		10290	1660	8110		9740	4190	1940		9690	3630	10030		9060	5880	2240		7820	4660	10130
10160	2290	2210		10270	1720	8200		9750	4180	1830		9730	3680	8950		9480	3380	1610		7820	4710	10030
10150	2360	2300		10270	1730	8190		9730	4220	1930		9690	3870	8950		9430	3740	1500		7840	4430	10160
10150	1520	3490		10280	1720	8130		9710	4240	1870		9600	3990	9830		9340	4240	1440		7840	4510	10050
10150	1530	3470		10330	1990	8950		9710	4270	1990		9960	2380	9010		9290	4530	1450		7830	4620	10040
10110	1750	3240		10340	2060	9010		9700	4300	1950		9750	3160	9380		9510	3100	1740		7830	4600	9990
10070	1870	3290		10260	2070	8730		9630	4480	1870		9760	3210	9290		9500	3630	940		7810	4640	10200
10200	1990	2760		10340	2260	9220		9650	4500	1760		9770	3440	8880		9220	4790	1440		7810	4650	10170
10220	1970	2440		10340	2290	9240		9610	4810	2040		9770	3460	8870		9520	3120	1700		7790	4920	10050
10050	2100	3290		10120	2230	8080		10200	1790	3310		9740	3590	9090		9500	3190	1630		7920	2390	10500
10220	1990	2430		10120	2240	8090		10230	1860	2740		9740	3610	9040		9480	3370	1580		7840	4330	10100
10100	2110	2950		10120	2240	8110		10160	2050	2680		9460	5040	9600		9380	3970	1400		7840	4400	10090
10170	2070	2520		10110	2310	8150		10110	2100	3080		10020	2190	9170		9340	4450	770		7780	4970	9990
10150	2190	2820		10400	3110	9640		10140	2120	2440		9980	2260	8700		9470	3370	1620		7540	6130	10220
10130	2180	2430		10230	4050	9220		10130	2140	2640		9890	2430	9650		9490	3420	1510		7830	4430	9970
10180	2190	2310		10260	1410	8290		10090	2190	2330		9840	2590	9580		9400	3840	1470		7820	4700	10060
10160	2210	2290		10260	1440	8280		10140	2240	2180		9940	2480	8940		9390	3850	1500		7820	4570	10030
10140	2290	2500		10270	1470	8050		10120	2270	2290		9860	2600	9230		9330	4280	1420		7810	4710	10040
10070	2730	1720		10270	1730	8210		10140	2370	1960		9750	3310	9280		9150	5680	1190		7810	4720	10060
10080	2790	1760		10310	1940	8900		10090	2370	2180		9790	3310	9070		9040	5880	2150		7830	4380	10040
10140	1580	3370		10340	2060	9010		10110	2390	2100		9760	3380	9110		9020	6190	2950		7810	4590	10020
10090	1770	3440		10250	2010	8670		10040	2380	2270		9720	3650	9010		9080	6250	1930		7810	4740	9990
10070	1840	3330		10260	2070	8730		10090	2430	2030		9560	4260	9780		9510	3070	1760		7790	4770	10150
10240	1890	2570		10230	2240	8830		10090	2460	2140		9940	2280	8310		9480	3350	1540		7770	5030	9990
10170	1950	3010		10110	2210	8260		10110	2470	1980		9970	2300	9020		9460	3450	1570		7810	4600	10020
10150	2010	2950		10120	2230	8080		10100	2480	2060		9960	2360	8840		9420	3610	1510		7800	4720	10030
10190	2000	2670		10120	2260	8110		10100	2500	1980		9870	2500	9270		9420	3670	1550		7790	4780	10030
10190	2010	2570		10110	2290	8150		9850	3430	2090		9900	2480	9180		9410	3710	1520		7780	4680	10230
10080	2160	3190		10260	1420	8280		9920	3620	1330		9850	2590	9510		9390	3910	1410		7740	5080	9990
10110	2170	2990		10280	1560	8030		9830	3620	2000		9850	2590	9430		9350	4120	1400		7750	5100	10020
10080	2140	2910		10260	1590	8220		9840	3630	1900		9900	2520	9110		9250	4600	1450		7700	5370	9870
10150	2110	2570		10260	1750	8160		9840	3680	1830		9820	2760	8350		9070	6260	1940		7810	4470	10020
10160	2110	2520		10180	2000	8040		9800	3770	2000		9750	3160	9370		9510	3110	1730		7800	4590	10180
10070	2250	3070		10130	2170	8460		9810	3870	1900		9800	3180	8830		9490	3270	1610		7780	4830	10050
10170	2150	2390		10110	2150	8330		9790	3900	1950		9800	3220	8950		9400	3430	1540		7770	4950	10000
10110	2250	2940		10110	2160	8270		9770	3950	1990		9690	3370	9600		9440	3540	1490		7780	4740	10130
10120	2370	2360		10250	1400	8290		9800	3980	1810		9680	3410	9640		9390	3870	1480		7760	4990	10000
10130	1620	3470		10290	1590	8050		9760	4010	2040		9680	3590	9950		9450	3490	1500		7790	3280	10750
10030	1850	3480		10250	1740	8170		9770	4020	1840		9610	3940	9810		9440	3510	1530		7780	4710	10150
10120	1910	3110		10260	1750	8160		9780	4060	1790		9560	4090	9860		9330	4190	1450		7800	4360	10090
10030	1970	3460		10310	1930	8890		9740	4090	1980		9490	4520	9840		9330	4220	1400		7780	4640	10050
10210	1900	2680		10200	2030	8560		9750	4200	1710		10000	2090	8150		9230	4660	1410		7770	4810	9980
10220	1910	2490		10160	2000	8290		9710	4240	2030		9950	2320	9160		9030	5870	2160		7810	4190	10080
10200	1950	2700		10130	2090	8240		9710	4230	1910		9900	2420	9390		9150	5060	1550		7800	4380	9980
10020	2050	3370		10220	4130	9250		9830	4260	1230		9940	2430	8920		9080	5470	1670		7790	4540	10180
10220	1980	2580		10280	1500	8020		9700	4240	1920		9890	2480	9170		9030	5880	2110		7780	4660	10030
10170	2020	2860		10280	1510	8140		9720	4260	1740		9790	2910	9870		9450	3430	1530		7790	4440	10060
10070	2100	3180		10290	1490	8060		9710	4300	1980		9840	2900	8890		9050	5620	1820		7770	4600	9970
10020	2140	3340		10260	1750	8140		9680	4290	2010		9740	3180	9540		9050	5670	1830		7760	4690	10170
10150	2080	2970		10170	2020	8030		9690	4360	2010		9730	3230	9510		9030	5840	2110		7740	4760	10240
10020	2140	3280		10140	2180	8510		9690	4350	1840		9740	3240	9370		9390	3880	1430		7760	4850	10060
10110	2110	2980		10120	2150	8340		9700	4360	1860		9720	3300	9480		9310	4130	1410		7750	4950	9940
10170	2070	2750		10120	2190	8050		9690	4370	1740		9650	3530	9690		9480	3250	1580		7270	7480	8980
10170	2070	2670		10100	2280	8440		9660	4460	1850		9670	3590	9870		9450	3370	1490		8000	1200	9460
10130	2130	2960		10220	4100	9280		9620	4500	1820		9700	3720	8910		9360	3930	1460		7770	4560	10160
10160	2090	2720		10240	1330	8220		9630	4580	1920		9610	3870	9810		9250	4640	770		7760	4890	9900
10130	2120	2840		10240	1390	8360		9610	4710	1950		10030	2080	9200		9080	5320	1550		7770	4620	10090
10130	2110	2780		10240	1400	8360		10180	1970	2480		9950	2260	9700		9240	4650	780		7760	4710	10110
10140	2120	2640		10270	1430	8040		10140	2080	2370		9980	2210	9200		9420	3370	1560		7770	4480	10040
10130	2190	2810		10270	1470	8070		10130	2120	2470		10010	2210	8850		9440	3430	1550		7770	4630	10140
10130	2150	2600		10280	1480	8060		10150	2180	2250		9980	2290	9120		9240	4510	1380		7760	4670	10010
10100	2240	2880		10290	1530	8040		10140	2250	2080		9940	2330	8780		9010	5770	1990		7760	4680	10080
10140	2190	2660		10250	1760	8190		10110	2260	2300		9940	2360	8690		9400	3550	1500		7760	4610	10030
10120	2220	2410		10230	1800	8300		10120	2300	2180		9840	2660	9750		9360	3810	1420		7760	4650	10120
10060	2910	1760		10180	1990	8040		10130	2300	2050		9910	2450	8830		9340	3880	1460		7760	4670	10040
10080	1490	3630		10130	2210	8500		10120	2350	2130		9850	2550	9330		9330	3950	1410		7740	4730	10060
10130	1530	3580		10110	2250	8080		10130	2390	1960		9830	2590	9480		9330	3990	1420		7730	4890	10000
10040	1900	3500		10100	2270	8090		10090	2460	2090		9820	2640	9460		9300	4220	1370		7770	4440	10140
10080	1880	3230		10100	2450	8240		10080	2640	1880		9790	2830	9810		9230	4670	780		7770	4460	9960
10050	1910	3400		10200	4160	9240		9860	3360	2390		9700	3350	9620		9400	3520	1520		7740	4630	10020
10040	1930	3410		10180	4190	9220		9850	3490	1950		9660	3500	9740		9290	4150	1380		7750	4600	10120
10220	1860	2580		10240	1350	8260		9800	3670	2030		9660	3660	10100		9240	4470	1370		7740	4740	10090
10200	1980	2530		10250	1320	7980		9810	3710	2010		9630	3840	10100		9400	3400	1530		7760	4530	10010
10200	1990	2450		10250	1390	8290		9810	3730	1970		9610	3880	10160		9330	3830	1460		7730	4810	10070
10040	2120	3250		10270	1400	8030		9830	3850	1800		9590	3950	9860		9230	4430	1380		7700	4950	10120
10170	2050	2700		10220	1810	8250		9790	3880	1910		9560	4040	9900		9230	4440	1400		7740	4630	10100
10180	2060	2510		10250	2830	8910		9800	3940	1840		9560	4120	9820		9340	3620	1470		7710	4680	10180
10050	2190	3170		10260	2840	8910		9850	4020	1370		10040	2070	9130		9050	5910	1340		7730	4700	10140
10110	2170	3010		10250	2860	8890		9750	4050	2080		9970	2270	8980		9050	5920	1350		7730	4700	10100
10130	2140	2440		10210	1340	8420		9750	4070	2070		9880	2390	9450		8970	6020	2260		7730	4840	10000
10130	2170	2460		10230	1330	8310		9750	4080	2010		9930	2380	9040		9390	3400	1500		7680	5060	10030
10090	2290	2970		10240	1390	8370		9710	4230	1690		9930	2440	8960		9300	4050	1380		7650	5330	9900
10150	2190	2350		10240	1370	8290		9710	4280	2030		9810	2650	9510		9160	4760	1410		7760	4280	10090
10150	2190	2380		10270	1450	8080		9680	4310	1920		9810	2670	9520		9410	3380	1500		7760	4390	10010
10150	2230	2330		10240	1640	8250		9720	4310	1730		9790	2690	9580		9340	3720	1430		7730	4550	10020
10120	2310	2490		10290	1920	8910		9680	4390	1980		9810	2670	9490		9230	4340	1390		7750	4570	9990
10050	2820	1700		10290	1940	8930		9680	4360	1720		9760	3030	9340		9190	4570	1330		7740	4630	10060
10120	1680	3280		10310	1980	9050		9670	4390	2060		9810	3020	9010		9070	5570	1080		7730	4660	10170
10100	1700	3360		10310	2020	9100		9670	4390	1930		9690	3400	9610		9050	5920	1350		7720	4750	10140
10070	1760	3510		10170	2000	8400		9660	4420	1780		9720	3510	9150		9390	3300	1610		7740	4680	10010
10070	1800	3410		10310	2230	9240		9640	4520	1900		9690	3690	9180		9260	4060	1390		7740	4060	10160
10090	1840	3190		10160	2040	8410		9630	4550	1810		9570	4060	10210		9170	4650	1450		7720	4570	10150
10060	1900	3340		10170	2000	8040		9610	4570	1790		9470	4590	9770		9210	4490	1360		7710	4660	10150
10040	1920	3290		10100	2200	8380		9620	4710	2040		9380	5050	10100		9160	4730	1430		7710	4670	10020
10020	1970	3390		10080	2460	8230		9600	4700	1890		9910	2400	9050		9090	5020	1510		7730	4770	10040
10200	1910	2630		10250	3650	9170		10230	1700	3030		9830	2530	9460		9340	3610	1430		7690	4840	10230
10210	1940	2490		10250	1400	8240		10170	1830	3310		9820	2620	9470		9260	4170	1360		7740	4400	10110
10200	1970	2570		10260	1370	8020		10130	2180	2420		9820	2630	9470		9060	5190	1560		7740	4550	9980
10190	1990	2680		10250	1440	8240		10110	2210	2480		9790	2780	9690		9100	4470	4680		7730	4670	9980
10040	2080	3200		10270	1390	7960		10100	2230	2820		9810	2710	9340		9370	3350	1550		7720	4750	10050
10130	2070	2990		10270	1420	8040		10100	2270	2220		9720	3170	9430		9150	4650	1420		7690	4910	10020
10130	2070	2930		10250	1470	8250		10090	2270	2440		9760	3350	8960		9380	3240	1440		7740	4230	10080
10140	2130	2870		10270	1500	8080		10110	2280	2240		9730	3520	8980		9240	4190	1380		7740	4480	9970
10100	2170	3040		10230	1780	8630		10110	2300	2160		9700	3680	9030		8950	5750	1980		7680	4740	10270
10150	2080	2670		10210	1860	8520		10050	2360	2990		9610	3890	10230		9250	4070	1360		7690	4880	10040
10140	2100	2660		10300	1990	9000		10100	2310	2140		9670	3880	9090		8970	6320	1930		7710	3170	10750
10180	2080	2350		10310	2030	9120		10100	2330	2110		9530	4260	9870		9380	3160	1620		7710	4420	10010
10140	2100	2610		10240	2030	8790		10070	2330	2530		9860	2390	9680		9330	3510	1480		7730	4400	10020
10090	2180	2910		10160	2050	8410		10090	2350	2210		9800	2710	9630		9330	3570	1470		7720	4560	10050
10130	2150	2720		10140	2020	8220		10130	2360	1930		9800	2740	9670		9300	3830	1480		7720	4640	9990
10100	2210	2910		10160	2310	8710		10100	2550	1920		9880	2570	8980		9200	4380	1340		7710	4640	10080
10170	2130	2300		10100	2250	8470		10100	2570	1880		9810	2700	9380		9070	4990	1320		8000	820	8870
10120	2150	2420		10100	2250	8060		9880	3410	1920		9770	3290	9030		9290	3740	1460		7710	4100	10230
10140	2180	2390		10100	2250	8060		9830	3460	2280		9590	3830	9830		9310	3930	870		7710	4600	10040
10060	2200	2620		10100	2260	8060		9830	3490	1920		9960	2220	8660		9040	5160	1500		7680	4670	10110
10100	2250	2770		10080	2370	8170		9810	3640	2040		9880	2350	9400		9270	3940	1380		7700	4600	9980
10060	2320	3070		10080	2450	8220		9810	3660	1950		9970	2260	8880		9230	4380	740		7700	4720	10040
10120	2230	2630		10180	4210	9200		9800	3770	2720		9920	2340	9280		9120	4750	1420		7710	4420	10160
10150	2210	2350		10260	1350	7930		9800	3700	2040		9940	2290	8920		8980	6110	1560		7680	4700	10140
10070	2340	3000		10250	1410	8240		9800	3720	1990		9880	2380	9400		9480	2250	1380		7690	4720	10100
10100	2270	2650		10260	1460	8060		9810	3750	1980		9940	2300	8820		9320	3490	1430		7710	4490	10030
10110	2550	1970		10230	1610	8350		9810	3760	1900		9910	2330	8580		9300	3650	1410		7710	4540	10010
10140	1420	3580		10240	1700	8330		9800	3790	1880		9840	2470	9530		9280	3750	1440		7680	4640	10200
10110	1650	3340		10230	1700	8260		9800	3820	1990		9930	2330	8980		9280	3830	1470		7690	4640	10010
10080	1750	3380		10290	1920	8920		9790	3820	2020		9830	2550	9690		9210	4260	1380		7690	4670	10090
10060	1790	3530		10310	1960	9050		9810	3820	1820		9920	2360	8840		9170	4500	1400		7670	4780	10120
10060	1800	3440		10290	1930	8930		9790	3850	1940		9930	2380	8940		9060	4580	4640		7650	5060	10000
10190	1930	2750		10240	1770	8190		9770	3940	2030		9820	2610	9850		8950	5560	1580		7710	4470	10070
10190	1950	2730		10310	2030	9120		9770	3980	1900		9830	2540	9560		9330	3480	1410		7640	4930	10190
10190	1940	2590		10300	2270	9310		9770	4010	2000		9920	2400	9020		9310	3550	1370		7630	5160	9900
10190	1960	2510		10160	2170	8640		9840	4000	1320		9820	2540	9540		9200	4280	1340		7710	4390	9930
10040	2090	3220		10080	2370	8170		9770	4010	1900		9810	2580	9550		9320	3430	1440		7700	4490	10080
10030	2110	3270		10080	2470	8230		9740	4140	2040		9880	2460	9090		9270	3680	1450		7680	4670	10140
10150	2040	2850		10240	2880	8880		9730	4180	1860		9870	2520	9260		9230	4020	1390		7680	4740	10030
10090	2110	3080		10240	2880	8880		9730	4200	2050		9800	2670	9730		9260	3770	1380		7690	4760	9980
10030	2140	3250		10200	1310	8380		9720	4210	1800		9880	2500	9050		9280	3940	880		7690	4530	10040
10180	2020	2500		10230	1340	8250		9710	4230	1830		9870	2520	8990		9250	3880	1370		7680	4590	10190
10130	2080	2870		10230	1380	8370		9700	4250	1830		9870	2540	8920		9220	4040	1380		7690	4660	9930
10160	2050	2460		10260	1420	8050		9690	4290	2080		9780	2800	9750		9220	4100	1340		7680	4710	10050
10130	2130	2740		10270	1400	7890		9670	4320	1970		9830	2880	8890		9190	4170	1360		7670	4790	10080
10140	2120	2650		10270	1410	7910		9660	4410	1880		9750	3010	9350		9250	3790	1440		7700	4510	9970
10070	2200	2960		10270	1430	7950		9660	4440	2050		9750	3000	9280		9250	3820	1430		7690	4570	10020
10160	2140	2410		10240	1530	8270		9580	4820	1880		9740	3040	9380		9230	4050	1350		7690	4030	10130
10030	2280	3120		10270	1520	7990		10220	1750	3010		9810	2980	8860		9390	2950	910		7630	4680	10190
10070	2260	3000		10230	1580	8270		10080	2130	3130		9810	3000	9010		9280	3550	1400		7670	4690	10040
10100	2190	2580		10230	1630	8150		10060	2160	3250		9740	3120	9370		9240	3780	1420		7650	4770	10250
10110	2250	2830		10260	1650	8060		10110	2220	2270		9700	3180	9530		9170	4390	750		7660	4840	9980
10100	2220	2700		10280	1920	8920		10100	2250	2460		9710	3220	9510		9000	5270	910		7640	5080	9930
10160	2180	2200		10290	1930	8930		10110	2260	2140		9780	3180	9020		8930	6190	1630		7860	1340	9570
10090	2280	2900		10300	2010	9110		10100	2340	2090		9670	3310	9640		9370	2550	1960		7690	4420	10150
10040	2220	2580		10150	2000	8240		10080	2390	2020		9740	3330	8810		9320	3290	1520		7680	4420	10080
10120	2230	2500		10140	2110	8520		10090	2410	2100		9750	3370	8820		9310	3400	1510		7690	4520	9980
10130	2300	2130		10300	2280	9320		10100	2440	1920		9750	3410	8930		9130	4470	1350		7660	4660	10030
10080	2330	2460		10140	2080	8030		10110	2520	1830		9740	3440	8840		9310	3320	1500		7670	4720	10010
10110	2410	2120		10100	2260	8060		9860	3380	1970		9730	3470	8800		9310	3350	1500		7660	4790	10020
10150	1390	3600		10070	2390	8160		9820	3590	2390		9740	3480	8970		9290	3460	1480		7690	4570	9980
10130	1460	3620		10070	2500	8240		9830	3580	1980		9730	3500	9000		9240	3600	1370		7680	4600	10050
10110	1580	3500		10350	2790	9620		9810	3580	2060		9720	3500	8840		9250	3600	1400		7660	4580	10110
10100	1590	3420		10350	2890	9640		9820	3710	1830		9720	3540	8910		9210	3900	1410		7630	4740	10190
10100	1800	3160		10220	2870	8790		9770	3760	2030		9720	3540	8930		9240	3650	1340		7650	4820	9990
10040	1840	3410		10250	3110	9000		9830	3950	1450		9720	3540	8850		9130	4350	1370		7680	4450	10000
10190	1870	2510		10250	1340	7860		9780	4040	1790		9710	3580	8820		9020	4580	4380		7660	4520	10160
10200	1940	2640		10260	1380	7860		9790	4030	1700		9700	3600	8880		9390	1290	4290		7660	4640	10030
10020	2050	3300		10270	1400	7900		9740	4070	2030		9690	3630	8880		9290	3470	780		7670	4060	10160
10190	1950	2570		10270	1430	7950		9750	4070	1780		9690	3690	9080		9220	3810	1390		7700	4400	9920
10030	2080	3300		10250	1510	8210		9760	4100	1890		9670	3780	8920		9200	3890	1390		7670	4430	10110
10180	1970	2540		10270	1540	8020		9750	4150	1690		9600	3890	10220		9170	4150	1320		7680	4540	9960
10180	2000	2500		10270	1630	8050		9720	4200	1870		9510	4320	10250		9130	4390	1290		7670	4600	10030
10180	2000	2340		10220	1770	8410		9710	4280	1700		10000	2100	9200		9250	3510	1440		7650	4640	10160
10150	2050	2820		10280	1930	8930		9680	4330	1880		9860	2400	9740		9240	3530	1460		7630	4750	10110
10180	2010	2410		10300	2020	9120		9680	4330	1770		9830	2480	9590		9220	3730	1360		7630	4780	10150
10070	2130	3060		10070	2410	8170		9660	4390	1940		9860	2500	9190		9070	4670	1370		7640	4800	10080
10100	2140	3000		10070	2460	8210		9650	4400	1740		9790	2690	9610		9190	3900	1370		7630	4940	9980
10160	2090	2430		10070	2490	8230		9630	4500	2070		9770	2760	9530		9130	4450	730		7600	4940	10180
10120	2110	2550		10350	2850	9640		9640	4510	1940		9780	3040	9100		9080	4610	1330		7660	4520	9980
10130	2160	2480		10210	2870	8790		9630	4490	1770		9700	3230	9470		9230	3650	1390		7670	4540	10020
10050	2280	3010		10240	3450	9070		9620	4530	1860		9690	3250	9550		9230	3850	860		7650	4640	10100
10090	2270	2860		10240	1450	8080		9600	4650	1840		9760	3260	8780		9180	4000	1390		7640	4770	10070
10090	2280	2880		10270	1590	8020		9610	4700	1920		9670	3360	9680		9100	4490	1360		7600	4820	10200
10110	2240	2430		10220	1760	8600		10220	1820	2720		9670	3460	9700		9050	4740	1410		7630	4700	10160
10130	2230	2340		10220	1750	8430		10180	1940	2670		9720	3410	8790		9250	3730	800		7610	4920	10010
10120	2270	2640		10110	2100	8420		10060	2180	3160		9640	3510	9710		9200	3820	1390		7610	4990	9940
10090	2260	2530		10150	2060	8020		10120	2150	2260		9720	3460	8840		9170	3970	1370		7660	4440	10100
10150	1390	3620		10100	2140	8300		10120	2160	2320		9700	3590	8950		9130	4240	1460		7630	4700	10100
10130	1440	3530		10240	3450	9060		10120	2200	2220		9610	3830	10200		9140	4420	730		7640	4730	9980
10130	1470	3620		10220	1420	8440		10090	2240	2260		9670	3750	9030		9120	4370	1320		7610	4790	10150
10050	1700	3520		10230	1380	8180		10030	2350	2990		9580	3900	9850		8990	5000	1280		7610	4910	10050
10100	1700	3230		10240	1410	8050		10070	2340	2170		9890	2310	9490		9240	3580	1420		7660	4260	10110
10070	1710	3370		10250	1430	8040		10100	2420	1980		9920	2300	9010		9130	3920	1370		7650	4510	10010
10070	1790	3280		10270	1580	8010		10110	2440	1870		9910	2360	8970		8990	4580	4430		7600	4820	10060
10050	1840	3340		10270	1590	8020		10110	2460	1910		9900	2430	8860		8980	5030	1450		7600	4880	10140
10040	1860	3340		10260	1610	8030		10100	2490	1850		9860	2520	9180		8910	5330	1430		7640	4470	10200
10050	1860	3290		10230	1770	8110		10080	2600	1910		9770	2860	9840		8860	5650	1720		7650	4480	9990
10100	1870	3120		10190	2180	8750		10070	2640	1790		9760	3080	9160		9230	3500	1390		7630	4600	10060
9990	1990	3410		10120	2110	8490		10080	2670	1710		9690	3180	9560		9210	3620	1400		7640	4640	10070
10020	1990	3350		10140	2060	8010		9830	3380	2400		9760	3210	8880		9210	3660	1400		7630	4650	10070
10200	1900	2560		10210	1300	8270		9840	3460	2630		9760	3270	8910		9120	4230	1330		7600	4650	10110
10190	1900	2540		10220	1330	8250		9910	3510	1500		9640	3650	10150		9090	4460	1360		7610	4680	10140
10190	1940	2470		10230	1320	7980		9830	3560	1940		9710	3540	8980		8980	4550	4460		7610	4770	10100
10000	2090	3330		10250	1540	8040		9810	3600	2010		9690	3580	8810		8860	6340	1840		7580	5150	9910
10160	1970	2400		10210	1800	8670		9810	3620	1980		9690	3600	8920		9250	3570	780		7820	1900	9040
10060	2080	3140		10130	2060	8380		9870	3730	1280		9590	3900	10200		9190	3820	1330		7650	4420	10050
10130	2070	2960		10110	2070	8140		9770	3730	2060		9510	4240	9870		9170	3940	1320		7630	4480	9960
10160	2040	2700		10090	2270	8550		9780	3820	2060		9950	2270	8830		8960	5020	1390		7620	4640	10140
10140	2070	2820		10080	2290	8060		9850	3850	1460		9870	2380	9410		9240	3570	780		7640	4630	9960
10080	2120	2930		10070	2460	8200		9810	3900	1800		9810	2550	9400		9200	3580	1450		7600	4870	10060
10090	2130	3020		10070	2470	8200		9800	3940	1710		9880	2470	9090		9300	2780	950		7590	4880	10110
10160	2080	2700		10110	4210	9080		9840	3970	1350		9790	2670	9460		9210	3480	1390		7570	5050	10030
10150	2060	2600		10210	1270	8160		9790	3960	1800		9880	2540	8800		9180	3740	1320		7560	5120	10020
10150	2080	2630		10210	1270	8170		9780	4000	1750		9760	2750	9460		9140	4040	1340		7640	4550	10070
10060	2180	3080		10210	1290	8200		9750	4070	1720		9780	2830	9310		9190	3530	1420		7610	4750	10030
10130	2160	2770		10230	1300	7940		9730	4110	1990		9780	2910	9180		9190	3810	810		7610	4830	10020
10050	2240	3100		10230	1330	7990		9750	4150	1740		9750	2950	9300		9170	3810	1270		7800	1290	9530
10060	2220	2970		10210	1430	8210		9700	4260	1940		9770	2950	9170		9280	2750	960		7640	4470	10090
10130	2180	2660		10250	1500	7900		9670	4360	1800		9780	3150	8900		9190	3820	840		7640	4470	9930
10090	2250	2910		10220	1620	8390		9660	4390	1930		9750	3290	8900		9070	4410	1320		7560	5060	10090
10100	2200	2460		10210	1670	8460		9650	4420	1810		9730	3390	8800		8830	6350	1810		7550	5260	9930
10120	2210	2450		10260	1600	8020		9650	4430	1820		9700	3530	8880		9160	3790	1330		7630	4150	10260
10090	2290	2780		10230	1780	8120		9620	4500	1840		9700	3550	8930		9380	1060	4470		7580	4810	10110
10110	2260	2350		10210	1810	8130		9590	4510	1850		9600	3670	9880		9310	2450	1840		7630	4390	10070
10110	2270	2370		10220	1810	8110		9620	4650	2020		9560	4010	9880		9220	3260	1410		7590	4750	10140
10110	2290	2480		10170	2050	8610		9610	4670	2000		9490	4410	9840		9160	3680	1360		7610	4740	9930
10110	2310	2320		10120	2110	8020		9600	4680	1980		10040	1990	9050		9150	3810	1350		7600	4780	9990
10090	2360	2370		10070	2230	8360		9590	4700	1870		9870	2300	9680		9160	3800	800		7620	4600	9980
10140	1430	3610		10060	2480	8200		10220	1670	3160		9830	2430	9500		9180	3840	810		7610	4710	9960
10130	1450	3630		10060	2490	8210		10230	1690	2970		9840	2460	9510		9130	3900	1340		7580	4750	10170
10090	1560	3600		10340	2930	9710		10230	1730	2790		9800	2610	9860		9160	3670	1380		7590	4820	10000
10100	1570	3550		10220	3440	9040		10210	1740	2900		9880	2440	9070		9140	3800	1350		7560	4840	10200
10110	1680	3230		10190	1330	8520		10230	1770	2810		9830	2550	9190		8940	5010	1420		7540	5100	10030
10070	1710	3430		10210	1250	8190		10180	1940	2700		9800	2610	9310		8940	5050	1490		7610	4630	10050
10120	1860	3060		10180	1360	8510		10140	2110	2290		9860	2540	8840		9100	4160	1330		7590	4760	10130
10000	1960	3500		10200	1370	8540		10110	2140	2310		9830	2590	9080		9030	4540	1310		7590	4830	10040
10020	1960	3360		10210	1260	8090		10110	2200	2260		9770	2840	9240		9180	3660	760		7590	4640	10100
10010	2010	3430		10210	1340	8280		10090	2230	2480		9770	3100	9040		9130	3660	1390		7570	4950	10020
10020	2020	3290		10220	1310	8120		10090	2280	2250		9760	3240	8990		9070	4190	1320		7610	4680	9900
10170	1970	2770		10240	1370	8020		10050	2340	2610		9750	3230	8890		9240	2780	930		7590	4750	10100
10180	1990	2290		10230	1450	8180		10090	2360	2180		9740	3380	8990		9220	2950	1470		7620	4760	9870
10040	2130	3230		10240	1490	8090		10060	2360	2440		9710	3500	8820		9160	3670	760		7560	4850	10100
10050	2150	3040		10260	1470	7890		10070	2390	2130		9680	3570	8880		9270	2390	1180		7580	4880	9930
10130	2080	2640		10260	1490	7920		10100	2410	2000		9670	3670	8810		9240	2700	1280		7560	4990	10010
10060	2190	3050		10260	1530	7970		10070	2480	1930		9610	3780	10180		9000	4670	730		7280	6170	10150
10060	2190	3040		10270	1520	7940		10050	2530	1990		9590	3940	10260		8990	4680	1290		7580	4650	10150
10100	2170	2930		10200	1690	8610		10040	2560	1900		9930	2270	8970		8910	5050	810		7540	4880	10140
10130	2130	2610		10210	1780	8680		9900	3150	2470		9870	2400	9230		8820	6090	1370		7570	4560	10260
10110	2120	2530		10200	1800	8550		9890	3180	2410		9790	2620	9580		9210	3180	750		7600	4530	9950
10000	2280	3160		10200	1770	8370		9890	3190	2500		9830	2510	9260		9130	3620	1310		7600	4640	10010
10060	2200	2770		10280	1930	9090		9850	3360	2430		9880	2460	8870		9150	3790	800		7540	4660	10200
10130	2190	2480		10200	1780	8440		9820	3450	1990		9760	2670	9390		9130	3800	780		7570	4680	10120
10090	2240	2650		10210	1750	8150		9820	3490	1980		9750	2830	9590		9060	4360	740		7560	4710	10160
10000	2370	3120		10150	2010	8540		9860	3690	1620		9730	2900	9400		8880	5190	1500		7580	4710	10100
10120	2240	2460		10060	2490	8210		9800	3780	1930		9750	2940	9260		9070	4110	1330		7580	4700	10000
10080	2290	2630		10060	2500	8220		9790	3790	1990		9770	3160	8940		8830	5380	1390		7550	4790	10150
10120	1420	3680		10060	2530	8250		9790	3810	2010		9670	3280	9560		9300	1760	2300		7550	4830	10110
10110	1510	3440		10340	2850	9670		9780	3820	2040		9740	3300	8850		9140	3600	730		7590	4480	10080
10090	1560	3450		10190	2920	8750		9780	3860	2000		9740	3340	8970		9000	4530	1310		7590	4500	10030
10100	1570	3570		10190	2920	8750		9760	3880	2080		9620	3590	9740		8930	4940	1430		7590	4640	9910
10080	1590	3590		10220	3460	9040		9760	3860	1820		9630	3690	10180		9440	580	4830		7560	4800	10070
10090	1610	3340		10220	3470	9040		9770	3980	1870		9600	3740	10170		9250	2360	1190		7590	4130	10070
10060	1660	3530		10220	3480	9010		9840	3990	1300		9680	3650	8920		9090	3920	1350		7560	4000	5810
10070	1660	3370		10190	1230	8230		9760	4020	1960		9580	3860	10180		9080	4060	1060		7590	4260	10140
10050	1770	3540		10190	1260	8290		9760	4020	1800		9570	3900	10090		9090	3720	1340		7590	4520	10000
10040	1800	3360		10210	1270	8220		9750	4060	1930		10050	1940	9000		9100	3770	1190		7560	4730	10120
10010	1890	3380		10210	1280	8250		9750	4060	1810		9990	2060	9240		9070	3880	1360		7560	4750	10060
10020	1920	3480		10210	1250	8140		9740	4080	1820		9980	2060	9200		9060	3960	1370		7600	4220	9960
10190	1880	2560		10190	1310	8300		9720	4180	1720		9900	2280	8540		9250	1750	2750		7580	4540	10140
10180	1900	2590		10200	1300	8270		9670	4340	1930		9910	2300	8720		9240	2340	1190		7600	4570	9950
10180	1940	2390		10160	1180	7620		9650	4370	1950		9910	2330	9020		9060	3840	1340		7580	4630	10020
10160	1960	2660		10180	1380	8520		9640	4420	1840		9900	2360	8830		9400	690	4980		7580	4660	9990
10170	2000	2690		10210	1310	8240		9630	4520	2030		9900	2370	8940		9230	2350	1180		7540	4910	10080
10160	2010	2700		10210	1270	7980		9600	4560	1730		9780	2630	9790		9120	3660	710		7530	4970	10050
10120	2110	2600		10210	1330	8280		9610	4630	2080		9870	2440	8790		9090	3620	1400		7570	4000	10080
10130	2090	2480		10220	1270	7880		9600	4680	1930		9850	2510	8700		9090	3690	1370		7590	4270	9990
10090	2160	2620		10210	1480	8700		9600	4710	2000		9760	2660	9470		9040	3990	1340		7580	4470	10070
10080	2240	2840		10220	1380	8110		9570	4870	2000		9760	2770	9790		8990	4460	1250		7570	4520	10050
10090	2190	2530		10220	1540	8740		10180	1760	3130		9760	2800	9920		9000	4510	1350		7570	4580	10000
10110	2180	2410		10220	1380	8010		10140	1900	3310		9750	2800	9570		8790	5500	1460		7570	4670	9970
10110	2210	2480		10240	1370	8020		10180	1930	2670		9750	3040	9150		9230	2350	1180		7550	4930	9950
10130	2220	2370		10240	1510	8080		10160	2040	2370		9750	3190	8760		9190	2860	890		7580	4120	10210
10090	2270	2590		10260	1490	7920		10130	2120	2330		9670	3280	9640		9020	4400	720		7580	4150	10180
10010	2390	3090		10260	1500	7940		10100	2130	2410		9750	3220	8850		8830	5220	1430		7520	4000	5710
10090	2260	2480		10190	1830	8640		10120	2160	2210		9640	3470	9910		9190	2720	950		7580	4450	10030
10080	2330	2560		10180	1870	8290		10120	2170	2260		9640	3460	9850		9130	3480	730		7550	4570	10190
10130	2300	2050		10170	1920	8420		10110	2190	2280		9720	3390	8930		9100	3670	710		7560	4640	10030
10040	2650	1730		10170	2070	8630		10100	2250	2170		9600	3640	9830		8970	4590	710		7530	4870	10040
10110	1410	3640		10110	2040	8250		10100	2320	2160		9600	3740	10220		9070	3690	1330		7570	4590	10020
10120	1420	3590		10120	2100	8010		10060	2330	2480		9580	3710	9850		8930	4750	1290		7560	4610	9980
10070	1490	3600		10060	2500	8210		10110	2350	2070		9600	3790	10220		9060	3780	1370		7560	4750	9980
10100	1520	3500		10060	2500	8220		10090	2400	1930		9590	3850	10220		9060	3830	1220		7530	4800	10100
10090	1560	3520		10230	3410	9040		10050	2400	2360		9320	5040	10480		8990	4150	1290		7540	4890	9960
10030	1680	3530		10190	1210	8080		10050	2420	2230		9930	2250	9090		9060	3750	1340		7530	4910	10020
10070	1680	3330		10200	1260	8050		9850	3260	2480		9820	2420	9620		8850	4650	4640		7580	4580	10020
10060	1690	3380		10200	1230	7840		9860	3320	2230		9790	2680	9950		9040	3790	1340		7560	4590	9980
10060	1690	3410		10200	1380	8420		9900	3330	1830		9820	2600	9060		9080	3430	1340		7570	4600	9920
10050	1710	3600		10220	1300	8040		9880	3340	1930		9750	2800	9450		9040	3810	1310		7540	4690	10140
10040	1770	3420		10220	1310	8050		9810	3510	1970		9710	2940	9480		9020	4070	1310		7510	4690	10170
9990	1970	3430		10200	1480	8700		9810	3540	1980		9730	3000	9330		8830	5080	1390		7530	4710	10200
9990	2000	3470		10210	1570	8780		9800	3590	2080		9660	3250	9600		8780	5370	1480		7560	4700	9990
10180	1900	2440		10260	1460	7840		9810	3600	1910		9710	3420	8990		9040	3720	1270		7560	4730	9930
9990	2030	3400		10260	1550	7970		9790	3700	1950		9610	3490	9820		8940	4580	1340		7520	4760	10210
10180	1940	2430		10250	1630	8020		9810	3730	1860		9630	3650	10230		9050	3770	1320		7510	4770	10220
10110	2100	2930		10230	1730	8080		9790	3740	1860		9590	3830	10210		9020	3850	1310		7530	4760	10080
10110	2100	2890		10190	1900	8610		9860	3760	1470		9570	3940	10230		8770	5380	1440		7550	4750	10010
10030	2160	3180		10200	1840	8150		9800	3750	1790		9530	3970	9870		9010	3880	1120		7560	4820	9920
10130	2080	2690		10190	1860	8200		9780	3790	1930		9420	4580	9890		8890	4900	1370		7530	4850	10020
10080	2180	2960		10150	2110	8620		9800	3800	1800		9920	2230	8620		9040	3880	1330		7500	4900	10150
10100	2130	2550		10100	2210	8570		9770	3910	1850		9930	2290	8970		8960	4380	1280		7520	4910	10060
10080	2210	2930		10110	2250	8650		9840	3940	1400		9890	2320	9010		9010	3740	1280		7580	4260	10040
10140	2120	2270		10050	2450	8170		9730	3980	2090		9750	2710	9780		9000	3870	1330		7560	4550	10070
10090	2200	2500		10050	2500	8210		9770	3990	1710		9840	2520	8990		8980	4090	1270		7540	4680	10020
10090	2250	2740		10220	3330	9050		9740	4040	1720		9860	2510	8790		8790	4830	4710		7540	4680	9940
10100	2200	2380		10210	3340	9000		9740	4110	2000		9780	2640	9360		8860	4900	1370		7520	4830	10040
10030	2360	2970		10210	3490	9030		9740	4120	1960		9750	2810	9610		8980	4140	1270		7560	4460	10050
10050	2270	2510		10180	1200	8200		9730	4110	1840		9740	2830	9380		8960	4270	1290		7560	4530	9990
10110	2260	2270		10180	1230	8260		9720	4190	2000		9720	2960	9340		8870	4820	1300		7540	4600	10170
10090	2310	2290		10210	1260	7860		9720	4190	1740		9700	3040	9490		9010	3620	1250		7520	4750	10180
10060	2730	2270		10210	1300	8040		9690	4200	1680		9730	3250	9030		8980	3960	1270		7520	4740	9990
10110	1450	3510		10200	1350	7880		9690	4250	1820		9580	3820	10180		8980	3960	1300		7550	4810	9870
10090	1530	3610		10210	1570	8790		9690	4260	1790		9520	4060	10270		9020	3630	680		7540	4840	9940
10080	1600	3540		10220	1430	8150		9680	4290	1830		9800	2520	9320		8980	3840	1250		7540	3910	10180
10080	1640	3560		10210	1580	8790		9650	4360	1860		9770	2640	9530		8930	4470	1300		7550	4480	10110
10080	1640	3310		10220	1480	8180		9630	4450	1720		9780	2610	9360		9060	3170	720		7520	4690	10050
10080	1680	3260		10190	1670	8590		9600	4630	2000		9760	2650	9440		8990	3740	1250		7540	4720	9990
9960	2040	3420		10250	1650	8020		9620	4640	2000		9750	2710	9460		8740	5350	1280		7530	4580	10160
10170	1940	2580		10200	1820	8720		9590	4610	1870		9640	3320	9700		9010	3770	710		7550	4570	9850
10180	1930	2360		10170	1860	8640		9610	4660	1950		9700	3370	8790		8970	3770	1240		7540	4640	10020
10170	1950	2440		10130	2220	8670		9590	4730	2040		9700	3420	9080		8950	4040	1240		7500	4720	10240
10000	2120	3260		10070	2280	8040		9580	4760	2010		9680	3500	8930		8950	4130	1300		7520	4740	10110
10160	2020	2400		10060	2330	8080		9590	4800	1940		9580	3800	10160		9050	3300	690		7510	4800	10060
10130	2090	2640		10050	2450	8170		10190	1710	3140		9630	3780	8840		8800	5020	1390		7510	4830	10010
10070	2180	2880		10050	2450	8170		10200	1800	2700		9990	2030	9140		9020	3330	690		7500	4940	10030
10000	2260	3190		10050	2540	8240		10190	1850	2650		9920	2220	9060		8960	3920	1300		7490	5090	9910
10050	2240	3050		10210	3320	8990		10200	1860	2760		9830	2410	9730		8930	4240	1290		7480	5170	9890
10110	2200	2820		10200	3460	8990		10130	1910	3160		9900	2280	9070		9020	3330	690		7570	4320	10000
10110	2160	2380		10220	1450	8140		10160	1970	2850		9890	2340	8850		8950	3990	1280		7540	4450	10150
10110	2160	2480		10250	1450	7790		10150	1980	2600		9850	2420	9170		8870	4610	1340		7520	4660	10050
10030	2230	2760		10230	1540	8150		10140	2000	2450		9850	2420	9140		8620	6050	2050		7500	4770	10150
10070	2210	2540		10250	1500	7870		10120	2060	2570		9820	2460	9290		8950	3870	1240		7550	4510	9940
10120	2210	2220		10250	1620	8000		10130	2100	2230		9870	2420	8950		8900	4280	1310		7530	4600	10040
10070	2240	2540		10200	1700	8370		10120	2130	2390		9760	2690	9880		8870	4620	1240		7510	4730	10070
10110	2270	2200		10180	1750	8450		10130	2160	2170		9760	2660	9540		8740	4870	4820		7540	4730	9880
10100	2290	2170		10240	1680	8050		10020	2270	3200		9750	2760	9910		9000	3330	690		7500	4950	9990
10100	2310	1920		10180	1820	8610		10070	2230	2540		9750	2630	9430		8990	3350	680		7540	4320	10160
10080	2400	2260		10190	1830	8520		10120	2240	2190		9740	2740	9790		8900	4320	1290		7550	4430	9990
10080	2390	2220		10190	1820	8480		10090	2270	2170		9750	2680	9540		8910	4330	1270		7540	4490	10040
10060	2590	1850		10100	2170	8560		10110	2300	1990		9790	2610	9260		8800	4890	1310		7530	4750	9940
10090	1580	3450		10100	2260	8680		10120	2310	2010		9750	2690	9550		8810	4750	720		7450	5210	9910
10070	1610	3530		10060	2330	8080		10010	2370	2930		9740	2730	9650		8910	4140	1260		7520	4190	10120
10050	1710	3660		10210	3340	9010		10070	2360	2130		9740	2770	9770		8900	4260	1230		7540	4340	9990
10070	1690	3250		10160	1590	8490		10050	2380	2250		9830	2570	8840		8780	4960	1310		7540	4440	9910
10020	1760	3530		10250	1610	7990		10010	2370	2560		9750	2720	9540		8850	4590	1290		7500	4600	10000
10100	1830	3080		10190	1700	8310		10110	2400	1910		9730	2820	9710		8600	5980	2080		7490	4680	10210
10170	1940	2720		10190	1820	8500		10040	2390	2380		9740	2780	9550		8660	5500	1330		7510	4710	10120
9970	2040	3380		10180	1910	8640		10030	2400	2500		9740	2810	9610		8870	4340	1280		7480	4780	10230
10170	1950	2680		10140	2110	8610		10090	2440	1890		9740	2790	9430		8840	4600	1410		7440	4940	10150
10000	2060	3300		10190	1350	7840		10090	2450	2020		9780	2740	9190		8910	3920	690		7480	4930	10050
10020	2110	3200		10180	1660	8550		10100	2450	1840		9750	2780	9340		8820	4710	1280		7530	4350	10050
10110	2070	2930		10240	1590	7950		10050	2450	2180		9730	2820	9430		8720	5140	1300		7540	4540	9890
10150	2030	2580		10150	2070	8670		10080	2470	1970		9740	2800	9350		8990	2780	1500		7520	4590	10080
10140	2040	2540		10160	1220	8310		10100	2470	1840		9710	2860	9540		8890	3910	1260		7500	4770	10040
10110	2110	2740		10240	1550	7910		10060	2500	2050		9770	2780	9180		8850	4400	1280		7480	4830	10100
10040	2200	3090		10230	1660	7990		10070	2540	1940		9720	2890	9650		8710	4770	4990		7500	4750	9970
10090	2140	2730		10170	1790	8560		10030	2800	1610		9730	2860	9460		8900	3930	1340		7490	4770	10090
10030	2210	3000		10220	1710	8060		9870	3260	2440		9720	2890	9520		8620	6360	1490		7490	4860	10010
10090	2200	2810		10220	1740	8060		9850	3320	2310		9730	2860	9390		8620	6360	1490		7500	4670	10100
10090	2190	2700		10140	2000	8500		9840	3340	2260		9720	2890	9430		8860	4290	1250		7490	4820	9940
10040	2310	3010		10120	2050	8640		9840	3360	2130		9760	3020	8900		8840	4320	1230		7450	4980	10100
10060	2280	2670		10130	2070	8570		9860	3450	1810		9760	3060	8930		8790	4750	1290		7450	5070	10020
10030	2320	2720		10150	1180	8270		9800	3460	2030		9750	3090	8780		8700	5220	1460		7440	5100	9990
9990	2750	1640		10150	1240	8400		9780	3500	2050		9660	3220	9600		8800	4670	1300		7490	4690	10180
10100	1440	3580		10160	1260	8430		9900	3530	1460		9740	3150	9050		8580	5910	1860		7480	4790	9990
10110	1460	3540		10160	1330	7520		9810	3570	2430		9740	3180	8820		9260	600	4640		7450	4830	10200
10050	1620	3460		10170	1340	7530		9800	3580	1890		9720	3290	8850		8860	4010	1270		7470	4880	10120
10030	1680	3570		10230	1660	8000		9800	3620	2020		9710	3380	8900		8430	6180	3410		7460	4890	10040
9990	1930	3490		10210	1740	8090		9790	3640	2070		9690	3420	8870		8930	3320	680		7480	4610	10160
9980	1940	3460		10170	2010	8850		9810	3650	1810		9700	3430	9020		8650	5450	1610		7500	4700	9910
10000	2070	3230		10060	2160	8390		9810	3650	1840		9670	3540	9040		8830	4430	1300		7480	4730	10050
10100	2090	2930		10280	2550	9600		9800	3670	1810		9680	3540	9010		8820	4600	1400		7480	4740	10010
10130	2040	2510		10150	1240	8420		9810	3710	1780		9580	3680	9800		8610	5620	1440		7440	4900	10240
10140	2060	2220		10150	1270	8470		9850	3720	1500		9660	3640	8980		8420	6170	3410		7410	4990	10230
10120	2080	2570		10150	1260	8440		9810	3740	1760		9580	3810	10250		8680	4800	4980		7640	2150	9270
10010	2160	2990		10150	1250	8390		9750	3790	2070		9630	3830	9000		8870	3690	1230		7520	4310	10170
10110	2100	2620		10150	1240	8360		9770	3790	2030		9540	3960	10230		8850	3850	1290		7490	4500	10040
10110	2120	2380		10160	1290	8400		9780	3800	1960		9510	4090	10300		8850	3970	1250		7460	4780	10120
10050	2230	2940		10160	1310	8460		9790	3820	1840		9480	4220	9910		8830	4150	1300		7460	4800	10110
10050	2170	2580		10160	1310	8440		9770	3840	1990		9550	4470	9000		8830	4200	1280		7460	4830	10070
10060	2220	2710		10160	1360	8540		9780	3860	1850		9870	2300	9100		8840	4050	1200		7450	4960	10020
10110	2180	2340		10140	1230	7500		9780	3870	1840		9830	2420	9260		8830	4070	1280		7500	4310	10170
10070	2250	2780		10150	1510	8570		9780	3890	1910		9840	2470	9090		8840	3970	1190		7490	4560	9980
10020	2320	2980		10160	1320	7500		9770	3890	1880		9750	2690	9610		8770	4700	1300		7460	4750	10150
10070	2230	2590		10220	1460	8080		9750	3940	2120		9790	2630	9190		8520	6120	2090		7470	4800	10040
10120	2230	2140		10230	1510	7790		9750	3970	2100		9710	2840	9680		8770	4570	1270		7490	4860	9850
10060	2270	2540		10240	1580	7930		9770	3950	1820		9760	2750	9280		8770	4640	1320		7450	4880	10010
10120	2230	2020		10170	1770	8430		9770	3950	1750		9730	2860	9440		8660	5280	1430		7440	5030	10000
10070	2270	2450		10150	1860	8570		9750	3960	1680		9750	3100	8820		8820	4010	700		7390	5310	9900
10030	2310	2570		10150	1940	8670		9710	4000	2120		9750	3110	8910		8520	6210	2490		7760	860	8930
10110	2270	2000		10160	1960	8740		9760	4020	1760		9730	3250	8930		8790	4340	1310		7760	870	8930
10070	2310	2520		10150	1940	8620		9750	4100	1690		9710	3310	8790		8410	6930	2790		7510	4390	10010
10100	2310	2150		10140	1930	8460		9710	4150	2050		9700	3350	8810		8860	3570	660		7510	4520	10000
10080	2320	2160		10120	2010	8510		9700	4200	2060		9700	3400	8910		8810	4080	1260		7470	4680	10150
10100	2360	1950		10130	2040	8550		9690	4240	2040		9650	3610	8930		8450	6860	2320		7490	4720	9970
10120	1340	3700		10130	1080	8030		9670	4270	2080		9640	3690	8890		8850	3330	1280		7450	4740	10220
10080	1500	3540		10140	1110	8070		9660	4340	1960		9640	3740	8910		8820	3980	1120		7480	4740	10030
10080	1500	3620		10150	1180	8250		9660	4320	1810		9850	2330	8390		8790	4210	1280		7450	4760	10100
10070	1540	3690		10150	1280	8330		9650	4370	1990		9870	2350	9130		8940	2430	1630		7470	4840	10030
10070	1590	3350		10160	1300	8350		9650	4380	1900		9850	2430	9020		8810	3970	1200		7420	5140	9990
10030	1700	3450		10150	1330	8440		9640	4470	1830		9750	2670	9950		8790	4240	1230		7390	5260	9950
10040	1720	3570		10130	1220	7480		9610	4520	1910		9770	2610	9590		8610	5260	1290		7750	870	8930
10030	1780	3380		10210	1470	8080		9600	4550	1910		9780	2540	9370		8790	4140	1020		7500	4510	9970
9980	1940	3440		10170	1390	7560		9610	4580	2000		9740	2680	9520		8680	5010	1380		7500	4530	10070
10150	1930	2550		10200	1510	8110		9610	4590	2010		9750	2720	9420		8630	5210	1400		7470	4610	9900
9980	2100	3290		10190	1480	7660		9590	4580	1820		9700	2970	10010		8450	6850	2310		7490	4690	9890
10050	2120	3030		10220	1510	7750		9580	4680	1830		9740	3060	9050		8810	3920	1200		7440	4880	10090
10090	2100	2860		10160	1750	8690		9550	4710	1840		9670	3570	8920		8790	4000	1270		7740	890	8960
10130	2050	2400		10230	1620	7940		10220	1700	2890		9550	3890	10270		8770	4290	1240		7740	900	8940
10090	2120	2890		10170	1760	8670		10200	1800	2850		9430	4490	9860		8550	5560	1410		7620	2150	9170
10150	2080	2190		10220	1650	7970		10180	1890	2630		9870	2340	9140		8750	4290	1280		7450	3640	10250
10040	2190	3020		10200	1720	8040		10110	2120	2280		9800	2440	9300		8770	4240	1250		7500	4530	9990
9980	2260	3170		10150	1970	8650		10040	2210	3150		9860	2380	9030		8410	6920	2390		7490	4560	10010
10090	2160	2680		10140	2040	8620		10090	2180	2380		9720	2780	9840		8790	3770	1140		7460	4640	9960
10120	2130	2210		10120	2110	8590		10110	2230	2140		9760	2660	9320		8770	4010	1200		7490	4660	9950
10050	2190	2690		10040	2380	8080		10120	2230	2090		9690	2940	9630		8420	6910	2370		7430	4720	10190
10020	2270	2990		10130	1210	8380		10010	2290	3170		9670	3060	9550		8410	6920	2380		7470	4750	9940
10020	2250	2840		10140	1240	8450		10080	2290	2210		9720	3200	8840		8730	4490	1240		7440	4850	10090
10050	2240	2670		10150	1430	8710		10110	2320	2050		9700	3260	8830		8760	4080	1280		7460	4870	9970
10020	2220	2610		10160	1300	8140		10050	2320	2460		9700	3280	8960		8700	4620	1260		7500	4440	9950
10090	2210	2280		10150	1570	8630		10060	2340	2250		9710	3330	8910		8600	4790	5060		7480	4470	10110
10070	2240	2560		10160	1380	7540		10090	2400	1980		9560	3810	10210		8660	5030	1380		7500	4490	9960
10060	2240	2380		10160	1700	8550		9960	2550	3020		9550	3860	10220		8410	6920	2370		7470	4550	10040
10070	2280	2530		10170	1930	8780		10060	2540	1960		9540	3880	10200		8730	4380	1240		7480	4630	10040
10060	2320	2550		10140	1910	8530		10050	2560	2030		9530	3880	9830		8680	4660	1220		7470	4650	10030
10070	2310	2380		10170	1860	8140		10060	2570	1870		9500	4080	9870		8650	4770	1290		7400	5110	10040
10070	2330	2350		10170	1870	8150		10050	2590	1900		9860	2320	9060		8400	6920	2370		7490	4540	10010
10100	2330	2070		10240	2110	9310		10040	2690	1840		9870	2340	9020		8590	4750	5170		7480	4640	9980
10080	2390	2030		10090	2200	8570		9940	2970	2360		9730	2690	9650		8750	3720	650		7470	4750	9920
10080	2430	1840		10150	1260	8350		9870	3200	2390		9770	2630	9220		8670	4680	1320		7460	4770	10020
10050	2480	1810		10150	1280	8380		9850	3290	2380		9710	2800	9570		8860	2500	1680		7410	4800	10070
9990	3040	1650		10230	1530	7750		9840	3320	2240		9700	2890	9570		9010	1060	3430		7430	4810	10120
9890	3880	2410		10150	1780	8780		9840	3370	2000		9740	2810	9250		8760	3460	1370		7420	4850	10060
10070	1540	3630		10230	1590	7920		9810	3500	2070		9770	2800	9010		8740	3640	670		7440	4830	9930
10070	1550	3580		10230	1590	7920		9820	3490	1970		9740	3020	8770		8830	2550	960		7380	4920	10070
10070	1600	3370		10230	1590	7920		9810	3520	1860		9710	3220	8880		8740	3790	660		7350	5280	10140
10040	1660	3610		10160	1780	8380		9800	3560	1990		9700	3290	8930		8700	4440	1140		7470	4420	10110
10040	1730	3420		10210	1730	8050		9800	3610	1810		9630	3460	10110		8780	3190	690		7460	4610	10030
10030	1740	3350		10180	1820	8090		9790	3610	2060		9690	3360	8860		8580	4920	730		7460	4660	9990
10010	1800	3390		10100	2070	8550		9870	3620	1510		9690	3360	8820		8450	5950	2110		7450	4690	10010
9990	1880	3450		10050	2160	8450		9790	3630	2010		9550	3670	9810		8770	3000	1360		7460	4680	9940
9970	1950	3550		10070	2180	8470		9780	3720	2680		9500	4060	10210		8700	4190	1250		7460	4800	10090
10160	1900	2490		10050	2170	8210		9790	3680	1900		9940	2140	8960		8580	5100	1350		7460	4800	9960
10160	1920	2640		10080	2140	7990		9770	3730	1850		9850	2290	8430		8720	3810	1150		7410	4890	10120
10160	1920	2550		10130	1390	8680		9860	3750	1480		9760	2600	9860		8710	3930	1280		7470	4570	10150
9960	2050	3440		10160	1380	8450		9780	3740	2020		9850	2390	8970		8700	4240	1250		7470	4640	9900
10150	1940	2390		10170	1410	7930		9790	3840	1810		9780	2560	9290		8680	3870	1260		7440	4690	10090
10150	1950	2620		10140	1610	8630		9750	3920	2120		9800	2530	9090		8670	4090	680		7420	4780	10160
10150	1960	2230		10220	1710	8010		9820	3950	1310		9730	2620	9450		8710	4100	1280		7450	4780	10010
9970	2110	3390		10170	1860	8110		9730	3970	2040		9700	2870	9710		8670	4460	1220		7460	4770	9870
10150	1970	2320		10110	2080	8540		9750	3990	1790		9710	2860	9480		8810	2380	1090		7430	4900	9960
10140	1980	2520		10050	2270	8000		9810	4060	1280		9710	2940	8280		8690	4200	1140		7420	5070	9910
10140	2010	2310		10130	1160	8270		9720	4060	2110		9650	3160	9650		8440	5870	2110		7410	5080	9930
10140	2020	2290		10130	1090	8030		9780	4180	1310		9610	3340	9720		8600	4770	1320		7470	4100	10060
10110	2110	2500		10150	1380	8440		9700	4240	1710		9690	3310	8880		8670	4130	1250		7470	4500	10020
10110	2140	2390		10110	1240	7420		9680	4280	1810		9580	3460	9740		8600	4820	1210		7470	4580	9980
10090	2180	2490		10150	1620	8680		9670	4280	1880		9570	3630	9840		8670	4360	1310		7450	4640	10020
10040	2280	2970		10140	1400	7510		9650	4330	2120		9520	3900	10230		8430	5890	2010		7450	4660	10090
10090	2190	2360		10160	1700	8730		9640	4410	1720		9460	4260	9900		8280	7030	2690		7460	4720	9890
9980	2330	3090		10160	1650	8310		9630	4460	1670		9860	2310	8990		8270	7030	2690		7400	4860	10190
10060	2290	2790		10210	1700	7980		9620	4470	1820		9710	2750	9850		8730	3120	1310		7400	4940	10120
10000	2320	2750		10140	1950	8710		9630	4530	2100		9710	2710	9620		8670	3940	1240		7420	5020	9980
10090	2280	2320		10040	2330	8030		9590	4520	1800		9710	2810	9860		8660	4320	1230		7360	5190	10020
10070	2290	2440		10100	1230	7430		9600	4530	1820		9730	2700	9390		8660	4350	1300		7450	3940	10160
10090	2280	2160		10210	1530	7740		9620	4590	2070		9690	2880	9540		8630	4440	1000		7470	4260	10120
10030	2330	2580		10170	1920	8910		9600	4620	1980		9680	2940	9680		8480	5430	1510		7450	4550	10070
10090	2290	2080		10120	1860	8600		9560	4750	1790		9640	3140	9560		8440	5400	4870		7470	4580	10010
10070	2320	2390		10170	1850	8100		9590	4820	2090		9720	3150	8880		8330	6950	2330		7470	4570	9960
10080	2310	2240		10150	2050	8850		9570	4840	2000		9620	3360	9700		8640	4370	1230		7410	4740	10200
10080	2310	2220		10030	2330	8020		9560	4870	1850		9690	3330	8810		8400	5870	1470		7440	4750	10030
10070	2410	2130		10090	1030	8010		10190	1730	3070		9560	3770	10250		8650	4230	1270		7400	4840	10190
10060	2480	2010		10110	1070	8050		10170	1890	2520		9520	4000	10260		8410	5820	1910		7390	4910	10190
10010	2710	1790		10160	1360	7800		10150	1950	2570		9370	4570	10610		8610	4370	760		7460	4670	9970
9990	2970	1720		10190	1520	7890		10130	2010	2560		9900	2170	8630		8520	5050	1460		7370	4630	5800
9900	3830	1790		10130	1710	8730		10140	2020	2420		9750	2550	9720		8470	5290	1280		7430	4780	10090
10110	1380	3720		10140	1740	8700		10130	2060	2310		9820	2420	9140		8640	4090	1170		7390	4890	10100
10110	1400	3620		10130	1840	8750		10100	2080	2860		9770	2510	9370		8580	4680	1360		7390	4980	10130
10080	1440	3650		10140	1950	8760		10120	2080	2400		9730	2680	9530		8710	2960	1430		7390	5110	9980
10090	1480	3670		10160	1850	8070		10120	2100	2200		9710	2810	9390		8660	3710	1190		7430	4090	10400
10080	1510	3670		10160	1860	8110		10040	2170	3210		9670	2890	9560		8640	4060	1210		7410	4640	10230
10060	1580	3520		10150	1870	8110		10080	2130	2670		9690	3010	8270		8620	4310	1310		7390	4850	10170
10060	1610	3350		10150	2140	8890		10090	2170	2450		9660	3340	10330		8640	3890	1280		7400	4940	10010
10030	1730	3370		10120	1080	8070		10110	2180	2180		9840	2290	8320		8620	4310	1270		7400	5020	9940
9990	1840	3540		10110	1190	8370		10090	2180	2230		9880	2280	8700		8390	5710	1360		7420	3710	10090
10160	1890	2380		10110	1190	8300		10100	2340	2010		9860	2330	8910		8290	6980	2370		7440	4570	10040
10150	1940	2490		10110	1270	8540		10060	2370	2090		9740	2630	9400		8620	4170	1210		7430	4610	10110
10130	1980	2460		10130	1210	8310		10100	2370	1870		9750	2620	9270		8610	4170	1250		7420	4690	10070
10140	1980	2320		10120	1370	8670		10090	2420	1850		9690	2790	9490		8780	2180	1920		7370	4710	10070
10140	1990	2470		10120	1340	7450		10080	2480	1860		9680	2860	9540		8620	4140	1210		7410	4770	10120
10130	2020	2180		10150	1720	8780		10010	2470	2190		9650	3110	9570		8350	6030	1840		7400	4780	10150
10090	2100	2640		10170	1830	8080		10040	2510	2170		9640	3170	9640		8800	1670	1550		7430	4790	9940
10060	2150	2710		10070	2120	8680		10040	2660	1730		9630	3200	9640		8600	4260	1240		7410	4810	10100
10110	2150	2260		10070	950	7830		9950	2930	2410		9570	3540	9750		8410	5140	4800		7430	4800	9930
9950	2300	3180		10090	1080	8140		9890	3200	2060		9540	3730	10000		8260	6930	2220		7410	4860	10040
10070	2250	2330		10090	1050	8040		9810	3440	1970		9530	3890	10210		8370	5820	1940		7340	5230	10010
10100	2240	2110		10090	1080	8060		9800	3480	2000		9520	3870	9980		8510	4790	1210		7430	3890	9990
10100	2240	2080		10110	1100	8070		9790	3540	2020		9430	4280	9910		8520	4830	1430		7450	4310	9960
10070	2280	2260		10110	1190	8340		9790	3590	1920		9670	2900	9520		8560	3980	670		7460	4470	9940
10060	2370	2080		10110	1200	7920		9790	3660	2020		9570	3570	9940		8200	7080	2650		7460	4510	9950
10060	2410	2280		10130	1410	7500		9790	3690	1990		9510	3940	10250		8640	2820	1430		7420	4630	10080
10050	2400	2010		10140	1670	8590		9840	3710	1550		9760	2480	9320		8590	3990	1230		7420	4720	9980
10010	2560	1730		10170	1470	7610		9810	3730	1750		9830	2400	8940		8360	5220	4790		7410	4810	10060
10110	1390	3740		10170	1470	7610		9780	3760	1970		9770	2500	9360		8560	4230	1300		7380	4860	10160
10080	1460	3680		10210	1560	7720		9760	3760	1950		9720	2630	9650		8540	4330	1300		7370	4980	10170
10080	1470	3630		10200	1560	7720		9770	3800	1770		9730	2570	9450		8540	4040	660		7440	4510	10000
10040	1580	3680		10140	1780	8640		9790	3810	1710		9710	2690	9650		8510	4520	1280		7420	4560	10130
10040	1580	3660		10120	1880	8600		9760	3860	2030		9710	2690	9660		8500	4620	1280		7400	4700	10120
10040	1610	3450		10170	1800	8050		9750	3870	2110		9740	2630	9400		8310	5890	1990		7430	4710	9830
10030	1620	3490		10170	1840	8070		9740	3920	2080		9720	2670	9510		8540	3320	600		7370	4960	10060
9990	1960	3340		10170	2060	9060		9780	3930	1750		9720	2670	9520		8530	4250	1250		7450	4400	9950
9980	2050	3280		10110	2110	8720		9760	3940	1850		9700	2740	9700		8540	3900	1190		7420	4600	10170
9940	2090	3400		10180	2300	9220		9760	3950	1800		9680	2750	9740		8500	4460	1210		7420	4610	10030
10120	2000	2480		10070	940	7820		9750	3990	1830		9740	2630	9270		8490	4550	1310		7380	4650	9980
10120	2020	2460		10070	960	7850		9690	4230	1700		9690	2730	9590		8490	4150	670		7390	4820	10030
10090	2070	2710		10100	1090	8210		9660	4300	1760		9700	2710	9470		8510	4240	1190		7410	4880	9900
9960	2180	3240		10100	1090	8100		9650	4400	2070		9720	2700	9380		8530	4100	1280		7390	4940	9960
10100	2120	2760		10090	1130	8260		9590	4590	1700		9690	2790	9610		8510	4280	1130		7430	4590	9960
10070	2130	2800		10100	1160	8290		9590	4670	1950		9720	2690	9260		8510	4280	1200		7410	4620	10150
10020	2200	2970		10120	1360	8670		9570	4670	1840		9680	2800	9640		8600	2610	1500		7430	4620	9940
10090	2120	2410		10160	1450	8080		9570	4720	1800		9700	2800	9600		8540	3320	670		7340	5040	10130
10120	2110	2110		10120	1410	7490		9580	4770	2000		9700	2760	9420		8550	3550	1280		7430	4470	10060
10020	2240	2990		10120	1410	7490		9580	4870	2090		9670	2850	9820		8500	4340	1100		7410	4550	10020
10070	2160	2570		10160	1470	7610		9550	4830	1860		9670	2830	9660		8260	6460	1620		7440	4550	9960
9990	2270	2760		10160	1550	7690		10140	2070	2220		9680	2860	9750		8520	3940	1200		7400	4670	10040
9970	2350	3100		10180	1740	8000		10090	2170	2240		9690	2860	9710		8530	3330	670		7390	4750	10000
10020	2310	2900		10130	1910	8190		10110	2190	2210		9710	2810	9390		8480	4390	1200		7380	4750	10030
10020	2240	2480		10060	2310	8720		10060	2180	2420		9690	2860	9500		8520	3330	670		7380	4790	10030
10040	2300	2610		10060	940	7860		10050	2200	2420		9660	2920	9760		8500	4200	1190		7390	4830	10000
10010	2300	2490		10060	930	7800		10080	2200	2250		9690	2880	9530		8490	4210	1160		7380	4850	10110
10060	2300	2380		10110	1170	8290		10070	2260	2100		9670	2940	9680		8480	3980	660		7380	4900	10010
10050	2300	2400		10110	1210	8360		10040	2290	2420		9640	3020	9700		8770	900	2480		7420	4490	10010
10010	2360	2600		10110	1580	8640		10010	2350	2980		9730	2950	9000		8780	910	2470		7410	4770	9940
10070	2360	2110		10150	1470	7580		10060	2420	1930		9630	3090	9610		8480	4440	1240		7370	4790	10120
10020	2550	1920		10130	1730	8820		10050	2460	1970		9730	3010	8830		8310	5270	4880		7400	4780	9990
10020	2580	1950		10160	1510	7670		10070	2540	1740		9640	3110	9560		8480	4260	1270		7370	4850	10070
9950	2910	1430		10120	1780	8800		10060	2580	1850		9690	3220	8890		8490	4010	1270		7360	4880	10050
10100	1450	3590		10170	1530	7630		9830	3350	1970		9580	3490	9770		8470	4200	1210		7340	4970	10030
10070	1470	3690		10180	1530	7660		9800	3510	2750		9560	3530	9780		8460	4360	1190		7400	4580	10090
10060	1540	3730		10200	1570	7720		9810	3520	1830		9550	3570	9930		8300	5210	4730		7380	4650	10170
9990	1780	3530		10130	1790	8710		9790	3640	1770		9550	3560	9770		8680	1660	2430		7410	4670	9970
9980	1780	3500		10190	1740	7980		9770	3710	2010		9540	3750	10210		8430	4460	1230		7360	4680	10010
9990	1890	3490		10180	1740	8000		9860	3780	1270		9510	3770	9850		8420	4670	1240		7400	4680	9950
10130	1920	2620		10120	1890	8640		9760	3780	1810		9520	3890	10200		8360	5000	1250		7390	4710	10010
9950	2060	3360		10160	1850	8070		9790	3780	1760		9500	3950	10250		8400	4720	1290		7380	4730	10070
9960	2080	3350		10140	1890	8130		9740	3840	1720		9490	4050	10290		8390	4840	1280		7360	4830	10100
10120	2020	2270		10070	2100	8540		9740	3880	2070		9460	4070	10250		8210	6350	1940		7400	4820	9880
10110	2050	2380		10070	2230	8700		9780	3890	1790		9350	4790	9830		8540	2550	1500		7340	4900	10180
10060	2160	2970		10030	2280	8580		9730	3950	2050		9920	2010	9260		8740	1110	3450		7360	4910	10020
10010	2180	3090		9980	2540	8310		9760	3940	1680		9890	2100	8460		8460	4140	1260		7340	5020	10070
10080	2110	2680		10080	1060	8180		9730	4010	1740		9850	2240	9160		8430	4330	1230		7410	4280	10100
10030	2180	2910		10100	1120	8250		9730	4030	1830		9800	2450	9060		8310	5220	1350		7400	4530	10120
10100	2100	2370		10120	1370	8690		9720	4110	1730		9680	2850	10000		8660	1700	2470		7300	5280	9940
10060	2140	2630		10110	1630	8700		9680	4210	1770		9770	2660	8710		8400	4270	700		7420	4460	10000
10070	2170	2750		10150	1450	7750		9680	4260	2030		9670	2880	9580		8360	4870	1300		7360	4840	10090
10100	2130	2180		10110	1410	7480		9690	4230	1750		9660	2950	9600		8460	4230	1220		7340	4960	10130
10060	2210	2670		10140	1470	7570		9650	4320	2000		9650	2970	9620		8350	4880	1240		7330	5100	9980
10050	2230	2780		10150	1470	7580		9650	4300	1800		9530	3790	10230		8410	4400	1150		7630	950	9080
10060	2210	2480		10160	1480	7590		9620	4450	2030		9520	3850	10220		8910	450	5270		7400	4390	10110
10020	2240	2630		10150	1520	7600		9590	4520	1730		9830	2260	9160		8410	4370	1190		7380	4700	10090
10070	2220	2420		10130	1800	8790		9570	4620	1830		9760	2450	9380		8040	6660	3330		7380	4710	10140
9990	2350	3020		10110	1830	8720		9550	4970	2000		9760	2470	9330		8250	5520	1430		7400	4700	9890
10050	2260	2650		10180	1740	7950		10200	1730	2720		9750	2510	9370		8380	4280	710		7360	4750	10170
10050	2260	2600		10190	1740	7990		10140	1840	3380		9810	2420	8970		8400	4520	1290		7370	4810	10050
10020	2300	2650		10170	1780	8010		10060	2110	3330		9700	2650	9460		8350	4860	1360		7330	4870	10170
10030	2280	2570		10150	1850	8100		10130	2050	2440		9700	2730	9390		8430	4150	1230		7340	4940	10050
10030	2280	2490		10110	1980	8660		10100	2060	2440		9780	2630	8680		8260	5190	4810		7390	3930	10040
10040	2300	2520		10120	2010	8780		10090	2090	2590		9690	2800	9440		8240	5410	1430		7400	4420	10050
10070	2260	2050		10130	1900	8160		10110	2120	2240		9680	2790	9420		8360	4310	730		7400	4450	10090
10070	2290	2210		10120	1910	8170		10070	2200	2170		9640	2940	9860		8390	4490	1230		7380	4640	10020
10030	2380	2460		10070	2130	8660		10060	2220	2380		9630	2980	9910		8200	6030	1990		7370	4720	10020
9980	2760	1760		10070	2090	8460		10100	2260	2050		9640	2950	9690		8260	5240	1370		7350	4760	10100
10080	1400	3670		10030	2290	8000		10070	2360	2010		9740	2830	8870		8410	4150	1190		7350	4820	10060
10080	1440	3810		10060	980	7980		10030	2400	2180		9540	3590	9930		8380	4450	1230		7350	4880	10030
10070	1460	3570		10090	1170	8370		10030	2410	2060		9890	2150	8700		8360	4330	1110		7360	4930	9980
10050	1540	3530		10100	1360	8690		10030	2410	2200		9830	2250	9300		8360	4460	1190		7350	4960	9990
10030	1630	3540		10100	1590	8710		10020	2490	2240		9840	2320	9020		8360	4370	1090		7340	5050	10010
9960	1920	3430		10100	1630	8760		10050	2560	1980		9780	2460	9100		8350	4410	1100		7320	5080	10050
9960	1970	3490		10150	1490	7600		10020	2660	1860		9680	2700	9660		8320	4810	1400		7390	4060	10030
9930	1980	3420		10190	1680	7910		9820	3320	2000		9670	2780	9590		8360	4470	1320		7400	4210	10030
10140	1920	2530		10180	1750	7990		9810	3390	2070		9660	2910	9590		8620	1250	2610		7400	4300	10010
9940	2060	3450		10110	2030	8830		9830	3410	1910		9640	3040	9730		8340	4410	1140		7400	4520	9960
9940	2090	3380		10130	1900	8160		9800	3440	1910		9540	3610	9830		8340	4330	1300		7350	4640	10080
10060	2040	2950		10060	2070	8520		9820	3580	1820		9490	3840	9870		8620	1280	3520		7370	4660	10110
10130	1970	2480		10050	2230	8680		9780	3660	1880		9390	4430	9950		8310	4090	670		7340	4740	10230
9910	2120	3370		10050	930	7830		9760	3710	2090		9340	4560	10000		8370	4190	1260		7350	4800	10080
10100	2030	2420		10060	950	7880		9780	3730	1950		9670	2840	9570		8370	4220	1220		7300	5050	10110
10110	2040	2370		10080	1090	8240		9790	3810	1700		9630	3010	9770		8350	4390	1280		7380	3450	9940
10080	2060	2460		10100	1350	8670		9760	3840	1860		9600	3170	9650		8320	4440	1020		7360	4740	9970
10110	2070	2190		10120	1450	7520		9740	3870	2130		9660	3210	8850		8270	5030	1500		7320	4820	10110
9970	2210	3130		10110	1880	8820		9760	3880	1830		9580	3360	9720		8340	4300	1260		7370	4840	9950
10080	2100	2350		10110	1850	8690		9760	3910	1790		9490	3950	10260		8310	4630	1410		7360	4880	9900
10090	2100	2310		10110	1850	8660		9790	3930	1460		9410	4240	10300		8200	4870	5070		7300	5040	10150
9950	2250	3170		10130	2090	8980		9770	3920	1670		9240	5370	9700		8340	4240	1150		7310	4760	10010
10050	2200	2890		10090	2060	8650		9770	3960	1710		9850	2270	8990		8330	4350	1230		7350	4810	9930
9940	2280	3160		10090	2130	8870		9770	4120	1500		9800	2390	8440		8320	4390	1120		7300	4860	10040
10020	2250	2880		10110	2170	8920		9720	4120	1640		9660	2810	9790		8320	4410	1130		7290	5060	10130
10080	2170	2310		10060	2190	8690		9710	4170	1660		9630	2970	9990		8300	4210	670		7390	4430	9940
10000	2270	2820		10080	3510	8810		9690	4180	1770		9610	3100	9670		8280	4440	740		7370	4470	10040
10060	2260	2380		10090	1180	8360		9670	4280	1970		9610	3110	9650		8330	4260	1260		7370	4490	10040
9990	2340	2560		10100	1420	7460		9660	4290	1740		9440	4090	10240		8310	4370	1200		7370	4640	9960
10030	2350	2530		10140	1480	7570		9660	4290	1780		9430	4170	10250		8190	5100	1230		7320	4840	10130
10020	2370	2570		10180	1590	7680		9650	4350	1680		9900	2030	9230		8110	5950	1560		7340	4830	9990
10050	2350	2250		10190	1630	7750		9650	4410	2060		9880	1990	8150		8300	4390	1130		7340	4900	10020
10030	2400	2480		10190	1670	7850		9630	4370	1750		9710	2530	9710		8290	4530	1190		7300	4940	10140
10030	2390	2380		10150	1690	7760		9610	4580	2090		9710	2530	9700		8280	4570	1210		7290	4970	10170
10020	2390	2360		10100	1920	8640		9550	4750	1870		9780	2430	9110		8280	4640	1260		7300	5060	10090
10050	2360	1900		10140	1870	8080		9560	4930	2120		9630	2910	9520		8170	5050	720		7380	4610	9910
10050	2390	2100		10140	2080	9040		9550	4950	2030		9700	3040	8890		8320	4150	1050		7280	4710	10110
10040	2430	2300		10080	2110	8730		10200	1760	2690		9540	3520	9790		8330	4180	1210		7360	4750	9880
10010	2610	1800		10210	2450	9670		10140	2030	2240		9430	4060	9910		8320	4300	1280		7350	4780	9910
9990	2820	1800		10060	1050	8200		10110	2050	2350		9400	4250	10370		8180	5250	1370		7350	4830	9890
9890	3800	1810		10090	1180	8360		10090	2070	2500		9390	4320	10290		8310	4240	1240		7340	4840	10000
9910	3850	1810		10090	1810	8740		10040	2290	2070		9920	1920	9240		8190	4970	5040		7300	4900	10160
9850	3960	1830		10180	1600	7700		10020	2290	2660		9900	2010	9280		8290	3630	660		7300	4950	10160
10020	1420	3700		10110	1880	8850		10070	2330	2040		9880	2110	8640		8260	4240	680		7370	4470	10100
10030	1630	3680		10110	1830	8630		10010	2340	2380		9730	2380	9840		8310	4270	1280		7370	4510	10040
9980	1800	3510		10180	1970	9240		10020	2360	2490		9720	2500	9440		8280	4540	1380		7360	4560	10010
9950	1950	3490		10100	2040	8910		10060	2390	2050		9700	2540	9580		8270	4360	1160		7350	4700	9960
10130	1890	2600		10130	1870	8100		10020	2420	2100		9640	2770	9750		8270	4420	1130		7330	4890	9980
10130	1910	2570		10130	1870	8100		10070	2440	1850		9650	2810	9750		8130	5660	1580		7530	2030	8950
10120	1960	2580		10130	2060	8950		9950	2490	3050		9630	2850	9810		8290	4410	1250		7370	4590	9860
9930	2120	3470		10090	2150	8840		10020	2460	2280		9720	2890	8900		8290	4390	1330		7310	4730	10140
10120	2010	2270		10130	2280	9080		10050	2500	1880		9600	3180	9670		8280	4440	1290		7300	4810	10170
9980	2150	3160		10090	1280	7860		10050	2510	1890		9480	3930	10260		8220	4720	1110		7310	4910	10040
10110	2050	2280		10180	1670	7820		10020	2560	1940		9380	4290	10270		8470	1990	2230		7300	4960	10110
9950	2200	3190		10110	2070	8820		10000	2620	1830		9930	1720	7670		8260	4490	1280		7290	5000	10070
10060	2120	2700		10020	2240	8500		9870	3150	2270		9900	2070	8880		8360	2860	1310		7300	5020	10030
10090	2100	2560		9990	2360	8470		9850	3210	2240		9820	2330	8700		8280	4350	1280		7300	5100	9910
10040	2200	2800		10040	960	7960		9790	3400	2090		9680	2590	9750		8200	4950	1360		7350	4310	10130
10040	2260	2910		10090	1260	7900		9800	3440	2120		9680	2640	9500		8360	2870	1300		7380	4420	9790
10020	2280	2840		10100	1660	8730		9790	3530	2680		9660	2700	9690		8290	4170	1220		7350	4530	10030
9980	2310	2770		10070	2070	8690		9800	3480	2060		9650	2860	9710		8280	4270	1200		7340	4630	10000
10050	2300	2480		10100	2230	9010		9790	3490	2090		9630	2890	9590		8310	4270	1250		7300	4710	9970
10030	2340	2520		10040	930	7870		9810	3550	1860		9610	3000	9640		8270	4520	1200		7310	4700	9950
10030	2350	2460		10060	1360	8420		9800	3590	1850		9580	3180	9770		8320	3470	1190		7320	4790	10070
10040	2320	2130		10110	1370	7980		9780	3620	2110		9490	3740	9840		8220	4260	690		7310	4780	9960
10000	2350	2470		10130	1520	7580		9780	3700	1850		9480	3810	9890		8200	4940	1330		7310	4880	10010
10020	2350	2410		10110	2020	8980		9760	3720	2080		9450	3970	9930		8380	2460	1820		7310	4900	9960
10010	2350	2380		10070	1990	8610		9750	3800	2120		9830	2170	9260		8170	4900	1220		7300	4950	10000
10040	2450	2290		10070	2110	8800		9760	3810	1770		9800	2230	9280		8220	4180	680		7360	4170	10050
10010	2530	2070		10060	2150	8710		9750	3830	1840		9820	2320	8910		8220	4480	1140		7360	4320	9980
9980	2780	1790		10030	930	7560		9780	3830	1750		9790	2370	9020		8260	4330	1210		7340	4690	10010
9910	3610	1890		10060	1120	8260		9750	3930	1840		9760	2450	8410		8230	4420	1270		7310	4740	10120
9900	3750	1850		10030	1030	7340		9710	4090	1650		9680	2650	9700		8210	4490	1090		7270	4770	10080
9850	3900	1890		10070	1500	8500		9720	4130	1650		9680	2690	9410		8210	4610	1320		7320	4800	10050
9890	3900	1860		10110	1490	7510		9710	4180	1630		9640	2810	9640		8010	6420	2250		7290	4840	10170
9880	4320	1760		10140	1610	7680		9660	4300	1690		9620	2930	9890		8200	4280	700		7320	4850	9970
10070	1380	3680		10090	1850	8740		9660	4330	1630		9600	2910	9760		8210	4440	1060		7290	4920	10110
10080	1450	3690		10110	2120	9060		9650	4390	2130		9580	3060	9750		8220	4440	1140		7260	5060	10160
10070	1470	3750		10090	2180	8950		9620	4350	1730		9500	3760	10210		8180	4830	1230		7350	4420	10070
10030	1480	3520		10030	1010	8040		9610	4630	2120		9490	3670	9840		8280	3720	1210		7360	4500	9980
10040	1550	3470		10030	940	7520		9560	4580	1840		9480	3880	10230		8260	4340	1200		7330	4690	9920
10030	1620	3630		10040	1070	8260		9570	4590	1820		9300	4620	10310		8220	4530	1330		7320	4770	9970
10010	1660	3670		10060	1250	8590		9560	4660	1870		9830	2230	8900		8180	4720	1250		7310	4810	10020
10000	1710	3590		10160	1730	7870		9570	4780	2030		9740	2430	9290		8250	4250	1290		7250	4940	10150
9990	1730	3430		10100	1970	8860		9540	4930	1910		9720	2460	9390		8200	4030	700		7260	5130	10000
10100	2020	2370		10070	2110	8820		10210	1670	2810		9690	2560	9490		8240	4340	1220		7340	4510	9960
10100	2050	2480		10100	2170	8950		10170	1710	3290		9680	2610	9490		8220	4360	1200		7330	4540	9980
10080	2090	2630		10040	2040	8270		10150	1870	2570		9660	2680	9730		8220	4480	1220		7320	4610	10130
10050	2160	2680		10070	2230	8940		10090	2080	2510		9660	2770	10060		8110	5130	4480		7330	4600	9940
10070	2140	2470		10020	940	7570		10090	2160	2320		9640	2830	9530		8080	5250	1330		7310	4750	10150
10040	2220	2490		10020	950	7540		10030	2240	2680		9630	2860	9650		8220	4350	1280		7300	4780	10120
10050	2220	2350		10040	1070	8230		10090	2270	1990		9720	2790	8680		8190	3820	710		7270	4830	10040
10010	2220	2510		10020	940	7520		10030	2270	2270		9600	2990	9880		8220	4320	1250		7260	5100	10070
10030	2260	2640		10050	1140	8360		10090	2290	1970		9610	3030	9980		8160	4550	1140		7320	4430	9960
10010	2390	2610		10050	1150	8310		10050	2300	2090		9610	2990	9710		8190	4390	1230		7340	4460	9960
10030	2360	2130		10060	1310	8650		10020	2350	2470		9590	3150	9730		8170	4550	1100		7320	4540	10080
10050	2390	2000		10070	1290	7740		10030	2370	2300		9570	3290	9740		8180	4650	1410		7350	4530	10000
10010	2470	1740		10070	1650	8650		10010	2380	2400		9550	3310	9740		8200	4230	1350		7320	4630	10170
10000	2630	1810		10100	1500	7540		10010	2400	2320		9520	3530	9840		8020	6270	1930		7330	4660	9910
9950	2720	1730		10100	1520	7530		10050	2440	2020		9420	4150	10260		8100	4900	1250		7330	4870	9890
9980	2730	1690		10080	1880	8760		10020	2430	2320		9410	4170	10270		7920	7180	2480		7270	4890	10100
9970	2850	1790		10120	1840	8010		10040	2570	1820		9880	1990	9160		8110	4740	1110		7290	4910	10000
9880	3770	1890		10120	2050	9070		10020	2690	1700		9840	2080	7890		8210	4130	1260		7280	4970	9960
9900	3810	1860		10120	2110	9160		10000	2740	1600		9810	2250	9130		8190	4290	1250		7260	5030	10050
9890	4010	1870		10080	2150	8900		10000	2770	1590		9620	2780	9850		8200	4350	1280		7260	5100	10090
9880	4020	1850		10160	3140	9980		9820	3250	2370		9640	2850	10060		8130	4500	1170		7330	3800	10090
9880	4060	1850		10020	940	7840		9820	3330	2430		9640	2790	9700		8180	4480	1370		7340	4340	10080
10070	1370	3780		10030	1000	8050		9820	3320	2050		9620	2900	9750		8330	2200	1690		7350	4360	9940
10090	1370	3690		10040	1070	8230		9840	3340	1960		9840	2220	8850		8230	3390	1270		7330	4570	10020
10060	1440	3520		10040	1030	8040		9800	3390	2020		9730	2480	9260		8240	3490	1250		7290	4690	10170
10070	1460	3530		10020	950	7510		9800	3450	2440		9580	3060	9710		8170	4300	1200		7280	4920	10020
10060	1470	3500		10050	1130	8380		9820	3410	1890		9580	3130	9810		8200	4060	1350		7270	4960	10040
10000	1650	3580		10050	1110	8270		9820	3430	1870		9650	3100	8680		8130	4790	1520		7240	5070	10120
10000	1670	3490		10060	1590	8730		9840	3460	1750		9570	3450	10360		8210	3080	1340		7220	5300	9930
9990	1720	3660		10070	1650	8820		9810	3470	1920		9490	3800	10260		8160	4360	1270		7350	4360	9900
9980	1720	3500		10060	1630	8660		9820	3470	1870		9470	3870	10220		8160	4380	1210		7330	4460	9960
9990	1750	3540		10130	1810	7950		9790	3500	2020		9770	2270	9230		7990	5370	4900		7320	4560	9920
9990	1790	3620		9980	2290	8480		9790	3510	2000		9680	2580	9410		7780	7020	3090		7300	4720	10020
9970	1800	3680		9990	2280	8400		9790	3530	1890		9630	2750	9700		8400	1280	1860		7250	4900	10140
9960	1870	3520		10020	980	8060		9790	3590	1790		9630	2740	9460		8140	3440	700		7250	4950	10200
9970	1870	3560		10040	1120	8380		9790	3650	1710		9630	2800	9460		8160	4280	1350		7250	5000	10060
9960	1940	3420		10060	1590	8780		9770	3690	1880		9590	3000	9940		8160	4330	1240		7350	4390	9910
9930	1960	3480		10070	1700	8750		9740	3700	2120		9570	3150	9680		8150	4340	1350		7270	4750	10110
9950	1970	3470		10140	1830	9190		9790	3730	1770		9440	3880	9930		8110	4520	1320		7300	4850	9990
9960	1970	3400		10090	1850	8940		9750	3890	1690		9410	4080	10260		8100	4570	1210		7260	4890	10080
10100	1920	2290		10150	1680	7710		9760	3910	1800		9320	4510	9960		8130	4560	1380		7300	4900	9900
9920	2170	3340		10150	1680	7730		9760	3940	1790		9250	4910	9860		7910	7180	2380		7310	4000	10110
10050	2100	2890		10110	1850	7980		9730	3990	1670		9770	2350	9140		8400	1290	1850		7320	4230	10030
10060	2100	2800		10110	1880	8060		9730	4040	1710		9700	2480	9440		7910	7180	2380		7320	4430	10040
10050	2130	2850		10080	2100	8870		9630	4330	1750		9630	2700	10040		8400	1290	1850		7330	4440	10010
10070	2100	2710		10030	2120	8620		9620	4370	1680		9670	2580	9380		8400	1300	1840		7310	4500	10070
10070	2090	2540		10090	2250	9060		9610	4430	1690		9640	2690	9510		7990	5500	1540		7320	4510	10060
10010	2160	2930		10080	2260	9090		9600	4460	1730		9590	3050	9670		8390	1300	1850		7300	4570	10050
9990	2200	3010		10060	2270	8940		9580	4520	1680		9540	3280	9750		8150	4310	1200		7290	4790	10100
10020	2180	2870		9980	2200	8570		9590	4580	1980		9510	3670	10270		8140	4350	1240		7310	4830	9850
10050	2160	2750		10010	2190	8540		9540	4810	1850		9460	3880	10260		8140	4370	1270		7220	4900	10170
9960	2250	3080		9960	2340	8540		9550	4900	2030		9440	3980	10260		8140	4390	1210		7390	2570	9540
10000	2260	2920		10160	3200	10010		10130	1930	2420		9410	4060	9930		8090	4500	1150		7310	3940	9990
10040	2220	2570		10020	1000	8080		10110	1950	2500		9380	4170	9980		8020	5090	4980		7320	4290	10090
9930	2360	3140		10010	940	7560		10110	1990	2410		9360	4250	10320		7980	5460	1510		7300	4540	10070
10010	2250	2620		10050	1260	8620		10090	2070	2600		9360	4280	10380		7930	6370	1860		7320	4530	9960
10070	2220	2100		10050	1270	8620		10090	2100	2300		9900	1800	8190		8380	1310	1840		7310	4560	10040
10030	2230	2420		10050	1300	8650		10020	2190	3230		9830	2160	8720		8140	3730	1020		7310	4570	9970
10010	2320	2810		10050	1160	7940		10110	2140	2150		9620	2850	9450		8110	4460	1250		7270	4720	10260
10060	2260	2120		10130	1830	9190		10070	2160	2260		9590	2920	9680		8100	4530	1230		7300	4740	9900
10010	2290	2560		10130	1840	9200		10050	2200	2660		9570	3040	9640		8060	4690	1210		7250	4910	10100
10060	2300	2200		10130	1840	9210		10040	2280	2340		9560	3070	9760		8110	4240	1130		7300	4030	10220
10000	2340	2540		10080	1990	9040		10040	2300	2170		9550	3160	9690		8100	4420	1200		7300	4030	10180
10040	2310	2030		10100	1880	8020		10060	2320	2130		9530	3280	9770		8060	4580	1110		7320	4390	10060
10040	2410	2350		10080	2100	9100		10030	2400	2090		9540	3330	9860		8110	4400	1370		7300	4490	9930
10010	2430	2380		10030	2160	8730		10060	2460	1850		9500	3580	9910		8060	4560	1130		7250	4630	9950
10040	2410	1910		10050	2190	8800		10000	2440	2320		9480	3580	9890		8080	4320	1150		7280	4840	9960
10030	2540	2040		10050	2240	8890		10020	2470	2060		9550	3660	8790		8090	4390	1280		7230	4940	10180
10000	2560	1810		10150	2420	9710		10020	2460	2010		9410	4020	10220		8120	4270	1290		7220	5130	10050
9960	2760	1660		10140	3170	10010		10010	2480	2170		9680	2530	9310		7900	7130	2150		7310	4500	9980
9860	3690	1780		10140	3190	10020		10000	2550	2170		9690	2530	9240		8100	4250	1290		7270	4650	10140
9900	3700	1870		10150	3200	10010		9990	2620	1910		9650	2640	9370		8090	4390	1190		7290	4680	9990
9860	3720	1840		10010	990	8060		10010	2620	1880		9610	2790	9810		8080	4470	1320		7270	4710	10180
9870	4030	1870		10040	1300	8640		10010	2660	1690		9630	2780	9690		8060	4520	1200		7270	4720	10170
9740	5150	1780		10090	1610	9000		10000	2670	1820		9610	3310	8720		8020	4610	1110		7230	4830	10180
10090	1290	3730		10090	1620	9010		9880	3030	2730		9460	3830	10240		8010	5080	1390		7240	4830	10200
10080	1370	3650		10070	1450	8110		9830	3290	2730		9330	4400	9970		7960	5170	1290		7220	4860	10040
10070	1390	3630		10120	1840	9210		9830	3250	2040		9810	2060	8000		7970	5260	1480		7240	4910	10070
10060	1430	3560		10060	2100	8800		9820	3340	2650		9820	2180	8750		8150	3390	1290		7260	4930	10030
10000	1580	3620		9970	2280	8470		9790	3390	1970		9570	3030	9740		8030	4610	1240		7230	5010	10090
10020	1610	3430		10140	3140	10000		9790	3440	2000		9540	3280	9720		8070	4110	1030		7430	2340	9240
10000	1690	3730		10140	3150	10000		9790	3460	2110		9530	3840	8830		8090	4120	1220		7290	4460	10110
9990	1720	3710		10030	1450	8600		9780	3470	2050		9400	4060	10260		8060	4350	1200		7280	4670	9960
10000	1740	3670		10050	1560	8650		9790	3520	1920		9370	4200	9960		8060	4410	1200		7280	4670	9940
9960	1870	3600		10060	1710	8890		9780	3530	2050		9860	1940	9140		8040	4440	1100		7260	4720	10000
9950	1930	3470		10060	1940	8850		9800	3530	1800		9840	1980	9210		8040	4500	1180		7270	4740	9990
10140	1900	2400		10040	2060	8640		9770	3540	2140		9830	2100	8410		8040	4560	1300		7260	4780	10020
10130	1890	2360		10030	2080	8630		9770	3570	2080		9800	2200	8860		8140	2450	820		7250	4810	10060
9920	2080	3510		10080	2170	9150		9790	3570	1830		9600	2800	10040		7990	4560	740		7250	4830	10020
9920	2090	3500		10070	2170	8980		9790	3620	1760		9620	2760	9430		7970	5000	1280		7220	4980	10120
10110	1950	2360		10060	2240	8960		9760	3640	1860		9590	2880	9860		8380	1110	4000		7210	4980	10040
10100	1990	2390		9990	2190	8540		9780	3680	1750		9580	3030	10080		8080	4140	1330		7220	5010	10030
10030	2110	2990		10050	2320	8960		9770	3860	1720		9490	3450	9790		7860	6620	1440		7290	4630	9930
10080	2040	2490		10000	2300	8710		9730	3920	2140		9490	3470	9820		7860	6620	1440		7270	4670	10050
10090	2060	2340		10140	3160	10010		9740	3930	1780		9460	3820	10260		7870	6320	1870		7270	4680	10030
10050	2160	2900		10050	1640	8600		9650	4300	1630		9450	3820	10170		8050	4310	1330		7250	4730	9990
10030	2190	2890		10060	1800	8720		9650	4380	2120		9370	4220	9990		7910	5340	1380		7280	4770	9870
10070	2140	2650		10060	1960	8780		9630	4380	2180		9230	4830	9990		8010	4450	1210		7250	4880	9980
10070	2140	2290		10050	2080	8970		9600	4410	1710		9200	4890	10330		7960	4530	750		7190	5110	9990
10020	2230	2910		10040	2050	8790		9590	4470	1870		9760	2190	9570		8010	4490	1200		7300	4270	10030
10060	2150	2310		10080	2110	9030		9610	4470	1700		9640	2690	9450		8000	4510	1130		7280	4520	9960
10070	2160	2340		10020	2060	8460		9590	4470	1720		9590	2810	9610		8020	4500	1310		7290	4540	9980
10030	2200	2630		10000	2100	8490		9580	4700	2160		9590	2900	9500		7990	4730	1270		7260	4630	9970
10030	2190	2590		10080	2240	9120		9550	4660	1710		9570	3060	9900		8220	2140	1950		7270	4650	10000
10050	2180	2240		10080	2270	9130		9540	4720	1740		9570	3030	9580		8070	4270	1290		7270	4770	10000
10040	2200	2470		9970	2160	8500		9520	4810	1760		9510	3440	9810		7980	4760	1290		7240	4850	10110
10050	2220	2080		9990	970	8050		10160	1710	3490		9450	3790	10260		8010	4150	930		7270	4850	9900
10040	2250	2400		9990	910	7800		10200	1760	2710		9680	2560	9290		8050	4200	1330		7240	4870	10060
10060	2230	2110		10010	1140	7750		10120	2050	2280		9630	2630	9450		8050	4290	1270		7270	4360	10070
10010	2290	2610		10040	1500	7510		10080	2150	2240		9600	2740	10020		8250	1660	2640		7260	4630	10030
10000	2330	2660		10050	1820	8830		10090	2150	2160		9640	2660	9350		8030	4390	1310		7260	4710	9880
10010	2310	2530		10050	1920	8810		10040	2180	2580		9580	2890	10170		7830	5910	4890		7270	4710	9850
10000	2330	2600		10060	2070	8950		10080	2230	2160		9620	2800	9420		7710	7200	2870		7260	4720	9950
10040	2300	2310		10060	2060	8840		10020	2250	2580		9570	2940	9780		8160	2220	1660		7240	4950	9990
10010	2350	2640		10040	2040	8670		10040	2290	2250		9560	2940	9750		8020	4190	1200		7230	4950	9900
10030	2340	2350		10060	2140	9090		9990	2410	2420		9580	2970	9530		8030	4330	1330		7190	5050	10170
10010	2340	2420		10010	2090	8600		10020	2440	2070		9530	3160	9840		7990	4450	1300		7180	5140	10010
9990	2380	2540		10000	2150	8630		10070	2540	1510		9500	3430	9900		7950	4750	1230		7190	5180	10040
10030	2380	2120		9980	2140	8420		9980	2560	1810		9440	3840	10240		8050	3990	1300		7260	3860	10100
10000	2410	2310		9960	2200	8510		10030	2610	1860		9440	3830	9900		8000	4490	1340		7300	4200	10060
10020	2460	1870		9960	2220	8450		10040	2680	1400		9360	4140	10300		7940	4680	1100		7240	4750	10220
10010	2470	1820		9960	2310	8480		9840	3220	2360		9360	4160	10330		8000	4440	1270		7240	4820	9980
10000	2550	1940		10030	1610	8510		9840	3250	2130		9340	4220	10320		8000	4450	1250		7210	4840	10150
10000	2550	1850		10060	1880	8940		9810	3310	2410		9790	2070	9330		7980	4540	1340		7250	4840	9910
9980	2580	1690		10050	1940	8870		9830	3290	1970		9690	2480	9170		7910	5000	1320		7180	4880	10200
9880	3630	1940		10060	2010	8920		9810	3330	2470		9570	2970	10180		8010	3290	710		7230	4930	10070
9880	3760	1810		10090	2060	9130		9820	3310	2040		9580	2910	9620		8000	4350	1300		7230	4930	9970
9890	3770	1930		10040	2030	8700		9820	3330	1950		9580	2980	9630		8000	3290	710		7190	5010	10130
9900	3780	1810		10020	2020	8450		9810	3330	1910		9550	3030	9880		8060	3810	1410		7280	4020	9990
9850	3860	1940		10000	2140	8570		9810	3370	2080		9650	2880	8660		8020	4210	1320		7250	4530	10140
9880	3880	1750		10020	2260	8820		9790	3380	2130		9550	3050	9790		7950	4550	1150		7240	4760	10070
9880	4200	1830		9930	2240	8570		9790	3400	2400		9540	3070	9840		8100	2670	1550		7220	4810	10140
9860	4230	1840		10000	1050	7440		9790	3440	2070		9540	3140	9790		7960	4540	1270		7240	4820	10000
10100	1260	3760		10020	1190	7970		9790	3490	1870		9450	3770	10280		7940	4600	1160		7230	4850	9950
10040	1530	3520		10060	1640	7580		9790	3490	1950		9410	3940	10310		7940	4690	1320		7200	4920	10030
10010	1610	3510		10010	2060	8540		9790	3510	1900		9180	4930	10360		7800	5820	4820		7190	4950	10080
10000	1650	3720		9950	2140	8380		9770	3680	1830		9840	2040	8620		7940	4510	1200		7210	4960	10050
9910	2000	3420		10040	2280	8990		9750	3710	1800		9700	2380	9330		7910	4780	1230		7180	5050	10110
9960	2030	3260		9970	2240	8540		9780	3730	1880		9620	2590	9780		7870	5160	1420		7200	5070	9950
9940	2080	3290		10060	2380	9210		9770	3790	1670		9680	2490	9240		7780	5830	4780		7280	4520	9900
10110	1960	2510		9980	930	8020		9740	3780	1780		9560	2990	9650		7950	4530	1230		7250	4570	10130
10110	1980	2260		9990	1110	7810		9760	3810	1730		9540	3080	9990		7960	4590	1370		7230	4720	10120
9940	2150	3260		10030	1610	8640		9770	3830	1660		9540	3090	9670		7980	4300	1330		7220	4780	10190
10090	2030	2310		10050	1870	8890		9770	3830	1680		9480	3450	9890		7940	4450	1270		7190	4950	10010
9970	2170	3140		10050	1910	8850		9770	3860	1690		9330	4270	10350		7980	4270	1220		7190	4980	10140
9920	2160	2960		10060	1770	7680		9720	3880	2120		9350	4220	9960		7990	4280	1290		7180	5170	9970
10030	2170	2750		10060	2040	9010		9700	4070	2070		9780	2150	8260		7930	4570	1160		7270	4380	10010
9980	2230	2990		10070	2180	9160		9700	4090	1740		9730	2330	9130		8030	3440	1390		7260	4410	10050
9990	2210	2880		10060	2200	9070		9680	4160	2150		9620	2570	9580		7850	4630	720		7280	4510	9940
10070	2150	2340		10050	2240	8990		9590	4490	1640		9610	2620	9530		7820	5290	1360		7270	4560	10020
9980	2230	2910		9990	2190	8590		9580	4540	1740		9590	2730	9870		8060	2320	910		7230	4710	10080
10050	2170	2430		10010	2340	8890		9570	4550	1690		9580	2830	10010		7950	4510	1410		7200	4700	10060
9930	2270	2950		9980	960	8020		9570	4760	2040		9590	2850	9560		7730	5940	4560		7210	4830	10040
10050	2190	2470		9980	960	8020		9530	4770	1810		9570	2890	9630		7960	4260	1290		7190	4910	10160
10060	2170	2150		9970	1070	7920		9540	4870	2010		9500	3470	10220		7890	4540	1110		7220	4920	10000
10010	2190	2500		10010	1210	8090		9530	4980	2160		9410	3810	9910		7870	4680	1130		7180	5110	10070
9990	2290	2900		10040	1770	8740		9510	5120	2000		9360	4150	10330		7860	4720	1080		7350	2440	9370
10050	2200	2360		10050	1850	8850		10130	1930	2620		9340	4170	10350		7840	5250	1450		7290	3090	9570
10040	2200	2160		10050	1910	8950		10110	1950	2600		9340	4200	9980		7710	5940	4530		7210	4460	9990
10040	2220	2440		10050	2050	8920		10140	1960	2280		9160	5050	10150		7900	4580	1250		7250	4450	10040
10000	2290	2750		9990	2080	8690		10110	1970	2500		9710	2270	9370		7900	4670	1290		7260	4520	10050
10050	2230	2270		9970	2160	8580		10110	1980	2460		9610	2730	10110		7930	4660	1410		7240	4580	10050
10050	2240	2200		10050	2280	9140		10070	2070	2270		9500	3270	9820		7750	5840	4780		7220	4670	10110
9970	2380	3000		9990	2220	8740		10050	2140	2600		9460	3690	10310		7760	5750	4920		7210	4830	10140
10010	2330	2420		10070	2300	9240		10050	2200	2670		9420	3840	10230		7830	4580	700		7200	4850	10070
10010	2370	2500		9940	2320	8610		10030	2210	2790		9340	4170	10300		7870	4640	1200		7170	4850	9970
10010	2360	2440		9940	2350	8490		10030	2200	2730		9650	2500	9580		7880	4630	1260		7260	4330	10010
10010	2370	2480		9970	920	8010		10070	2290	2000		9580	2650	10040		7820	4670	1160		7250	4360	10020
10010	2390	2260		10040	1860	8960		10010	2310	2310		9620	2660	9430		7930	4330	1350		7140	4530	9980
10020	2450	2300		10030	1870	8850		10030	2340	2180		9550	2870	9930		7870	4470	1070		7250	4560	9930
10000	2470	2050		10060	2040	9050		10000	2340	2610		9570	2840	9650		7910	4540	1360		7220	4560	10000
9890	2710	3080		10000	2040	8620		10010	2360	2340		9550	2930	10090		7870	4620	1180		7240	4650	10020
9870	3590	1880		9990	2010	8380		10020	2430	2130		9490	3380	9890		8110	2020	1810		7200	4730	10200
9880	3670	1860		10040	2170	9030		10000	2470	2080		9490	3370	9820		7930	4280	1300		7210	4760	10120
9880	3890	1920		9980	2150	8610		10020	2490	1990		9480	3390	9820		7880	4460	1110		7200	4800	9950
9860	4010	1940		9980	2170	8660		10030	2500	1930		9350	4100	10290		7680	6000	4610		7190	4980	10010
9880	4030	1890		10010	2280	8910		10020	2510	1980		9330	4260	9980		7740	6440	2150		7250	4430	10090
9860	4050	1920		9950	2200	8430		10040	2540	1720		9860	1740	8120		7950	4180	1340		7230	4520	9950
9880	4090	1800		9960	2250	8580		10020	2580	1810		9650	2450	9520		7930	4290	1360		7230	4560	10150
9880	4130	1810		9940	2270	8550		10010	2640	1670		9610	2610	10070		7920	4420	1340		7240	4760	9870
9860	4150	1840		9930	2360	8500		10000	2690	1770		9510	3170	9890		7870	4550	1230		7260	4140	10070
10090	1320	3750		9910	2570	8200		9980	2710	1700		9520	3170	9680		7730	5820	4780		7250	4150	10030
10050	1490	3780		9980	1140	7700		9990	2720	1670		9470	3380	9850		7950	3870	1370		7260	4360	10030
10040	1530	3710		9980	1210	7640		9980	2750	1670		9410	3860	10260		7750	4580	720		7230	4510	10030
10000	1590	3520		10010	1660	8720		9880	3020	2580		9390	3880	9930		7930	4090	1300		7260	4580	9880
10000	1650	3690		10040	1600	7560		9870	3120	2090		9370	3990	10240		7890	4300	1140		7240	4680	9930
9970	1690	3510		10040	1930	8970		9830	3250	2100		9360	4060	10290		7980	3550	1470		7220	4680	9990
9940	1950	3550		10040	2110	8960		9800	3380	2090		9230	4680	9980		7960	3600	1250		7180	4730	10020
9930	1980	3580		9990	2120	8680		9780	3410	2050		9740	2240	8950		7950	3810	1330		7170	4750	10120
10120	1900	2520		10040	2230	9130		9780	3440	1960		9580	2830	9440		7860	4600	1220		7210	4890	9910
10080	2020	2330		10030	2260	9040		9780	3460	1930		9530	3030	9710		7810	4610	1140		7250	4260	9940
10060	2130	2460		9940	2160	8450		9780	3530	1930		9530	3040	9630		7830	4660	1120		7240	4420	10040
10030	2180	2690		9990	2270	8780		9750	3580	1750		9400	3780	9890		7720	5790	4790		7230	4540	10020
10000	2170	2610		9980	2330	8840		9780	3680	1780		9330	4160	10340		7890	4200	1200		7180	4760	10050
10020	2230	2710		10030	2400	9310		9770	3750	1750		9320	4200	10310		7900	4220	1250		7200	4780	10000
10000	2230	2640		10040	2100	9080		9750	3760	1820		9850	1840	9440		7930	4230	1290		7130	5100	10120
10040	2220	2360		10010	2070	8750		9750	3870	1650		9590	2670	9590		7800	4670	1140		7140	5190	9960
10030	2230	2330		10000	2040	8570		9750	3880	1760		9610	2700	9400		7680	5990	4790		7230	4460	10080
10020	2250	2510		10040	2180	9070		9720	3910	2110		9570	2790	9530		7950	3720	1380		7220	4660	9980
10010	2280	2430		9980	2130	8550		9740	3950	1650		9530	3000	9990		7910	4100	1330		7220	4690	9930
10050	2290	2050		9970	2110	8500		9700	4020	2160		9480	3290	9940		7900	4180	1290		7150	4720	9940
9980	2360	2660		10000	2190	8800		9730	4020	1670		9480	3290	9860		7910	4200	1310		7200	4770	10010
9980	2380	2700		9960	2180	8630		9710	4070	1740		9510	3060	10050		7820	4650	1140		7140	4900	10170
9980	2330	2400		10000	2210	8800		9680	4130	2140		9360	4000	10270		7850	4620	1290		7190	4890	9960
10000	2340	2480		9950	2170	8540		9650	4250	2180		9710	2240	9310		7820	4670	1190		7160	4940	10120
10030	2380	2050		9970	2210	8640		9660	4250	1690		9630	2410	9760		8090	1830	2040		7160	4950	10090
10010	2370	2000		9970	2270	8750		9660	4260	1640		9610	2590	10070		7910	4050	1220		7170	5070	9950
9980	2440	2340		10040	1870	9000		9610	4480	2140		9580	2660	9610		7920	4200	1500		7150	5070	10050
10000	2430	2120		10040	1960	9100		9590	4630	2130		9560	2770	10110		7790	4690	1090		7140	5090	10050
10000	2430	2070		10050	2090	9090		9540	4650	1810		9530	2950	9720		7650	6040	4560		7230	4290	10080
10010	2440	2060		9990	2120	8660		9620	4800	1300		9540	2940	9600		7900	4030	1210		7230	4380	10070
10020	2450	2070		10030	2200	9020		9540	4780	1800		9550	2930	9520		7890	4280	1380		7230	4380	9980
10000	2490	2210		9970	2050	8230		9560	4860	2160		9510	3040	9690		7850	4470	1250		7210	4400	10030
9990	2450	1730		9970	2150	8680		10190	1580	3080		9600	2970	8600		7840	4530	1170		7220	4450	10050
10010	2510	2000		10010	2190	8840		10180	1640	3080		9510	3080	9700		7850	4520	1200		7230	4490	10020
9990	2520	1710		10040	2320	9150		10200	1700	2680		9490	3210	9840		7890	4480	1440		7210	4640	10040
9970	2690	1780		9980	2320	8800		10140	1890	2500		9460	3420	9860		7850	4590	1370		7210	4680	9960
9950	2870	1780		10000	2380	8960		10120	2010	2250		9430	3700	10270		7850	4640	1320		7180	4900	10030
9900	3520	1950		10050	2400	9360		10100	2010	2430		9420	3770	10250		7820	4590	1170		7150	5030	10050
9900	3520	1900		9960	1260	7400		10100	2060	2290		9370	3860	9960		7830	4590	1280		7110	5330	9940
9850	3590	1780		9990	1560	8790		10080	2060	2320		9350	4040	10290		7850	4500	1140		7190	4680	10020
9880	3670	1950		9980	1410	7530		10060	2100	2590		9340	4090	10330		7910	4070	1470		7200	4770	9940
9880	3690	1830		10010	1710	8740		10100	2120	2130		9330	4140	9950		7880	4140	1200		7190	4760	9910
9860	3750	1740		10020	1820	8850		10100	2130	2150		9260	4430	10020		7810	4650	1190		7120	4860	10000
9870	3800	1940		10010	1800	8750		10010	2180	3220		9870	1610	8100		7920	3580	1260		7170	4900	10080
9870	3880	1840		10050	1880	9080		10080	2180	2130		9610	2530	9560		7850	4280	1120		7180	4980	9920
9870	3970	1870		10010	1920	8900		10060	2170	2300		9560	2740	9740		7850	4430	1280		7200	4590	10140
9870	4040	1730		9990	2000	8640		10040	2190	2660		9530	2850	10170		7850	4400	1220		7190	4670	10050
9850	4070	1780		9990	2160	8800		10040	2200	2390		9520	2990	9660		7910	3910	1460		7170	4770	10090
9860	4120	1950		9970	2190	8710		9980	2260	3200		9420	3580	9860		7850	4120	1100		7170	4870	9960
9850	4270	1880		10000	2300	8960		10050	2220	2140		9410	3750	9950		7860	4410	1390		7150	4910	10060
9850	4330	1870		9940	2280	8580		10030	2210	2610		9380	3880	10010		7920	3210	1300		7110	5190	9980
10060	1350	3860		10030	1910	9070		10060	2250	2140		9330	4050	10290		7840	4270	1170		7220	3410	9930
9990	1620	3580		10030	1960	9030		10030	2240	2350		9730	2090	9340		7790	4690	1250		7210	4020	10140
9970	1700	3560		9980	2030	8540		10050	2250	2060		9610	2410	9780		7760	4730	1060		7210	4480	9960
9970	1770	3570		9970	2110	8610		10030	2260	2590		9570	2620	9690		7820	4720	1330		7180	4680	10120
9920	1940	3630		9980	2170	8720		10000	2300	2370		9550	2760	9630		7840	4370	1300		7180	4670	9920
10100	1910	2400		9960	2160	8590		9980	2350	2850		9550	2810	9560		7820	4530	1260		7190	4720	9890
10080	1940	2400		9980	2290	8900		10060	2350	1970		9500	3080	10190		7800	4520	1380		7190	4760	9960
9910	2080	3360		9950	2240	8650		9990	2350	2580		9530	3000	9620		7790	4640	1270		7170	4830	10000
10100	2000	2140		9930	2200	8370		9970	2370	2710		9340	4070	10260		7800	4360	1150		7150	4870	10150
10070	2060	2330		9930	2340	8620		9990	2360	2610		9310	4120	10270		7830	4540	1400		7150	4970	10070
10050	2100	2660		9980	1410	8460		9990	2380	2550		9300	4190	9980		7780	4620	1180		7150	4980	9960
10060	2080	2310		9980	1480	8670		10050	2410	1910		9220	4600	10000		7760	4670	1110		7100	5260	9950
10010	2150	2830		10020	1990	9000		10070	2420	1850		9060	5570	9630		7730	5260	1430		7210	4470	10050
10060	2090	2140		10020	2020	8900		10000	2400	2330		9780	1910	9260		7820	4340	1320		7210	4600	9920
9890	2210	2900		9990	2110	8760		10010	2430	2000		9700	2340	8290		7790	4520	1210		7200	4660	9900
10040	2150	2670		10000	2180	8890		10020	2480	1840		9640	2430	9290		7750	4570	1270		7190	4680	10040
10060	2130	2100		9980	2160	8720		9990	2480	2320		9600	2550	9580		7740	5530	1670		7180	4770	9980
10060	2150	2120		9990	2200	8860		10020	2530	1890		9500	3080	9650		8140	1050	3240		7140	4840	10210
10030	2200	2470		10030	2250	9090		9980	2530	1940		9460	3320	9910		7900	3620	1500		7160	4840	10100
10050	2200	2240		9970	2180	8690		9990	2590	1920		9440	3460	9860		7800	4590	1310		7120	5040	10120
10010	2240	2430		9960	2200	8660		10010	2590	1940		9760	1980	9360		7800	4700	1420		7070	5320	9920
10040	2230	2170		9990	2270	8990		10010	2590	1910		9580	2580	9710		7810	4720	1460		7210	4330	10110
10020	2250	2420		9940	2280	8680		10010	2610	1700		9600	2550	9490		7740	4800	1160		7210	4430	9950
9970	2310	2680		9930	2220	8410		9990	2620	1730		9580	2680	9350		7750	4840	1270		7180	4650	9910
10000	2330	2690		9980	2310	8840		10020	2620	1670		9440	3400	9830		7830	4300	1340		7190	4690	9870
9980	2340	2710		9970	2360	8880		10010	2640	1760		9690	2110	9450		7770	4550	1120		7160	4820	10010
10010	2360	2360		10000	1700	8960		10000	2640	1650		9710	2120	9380		7650	5790	4880		7170	4840	9900
10010	2330	1990		10020	1740	9010		10010	2650	1710		9670	2330	9130		7890	3680	1320		7140	4910	10130
9970	2370	2350		9980	1780	8790		9920	2890	2450		9500	3240	10380		7830	4340	1410		7150	4920	10080
10030	2340	1960		10000	1900	8920		9870	3030	2720		9460	3360	9800		7760	4570	1170		7120	5100	10040
10010	2380	2320		10020	2090	9150		9860	3070	2520		9420	3500	9870		7750	4670	1210		7130	5120	9930
10000	2410	2370		9980	2020	8640		9840	3170	2530		9290	4150	10310		7770	4680	1310		7120	5220	9880
10010	2410	1980		10010	2180	9170		9830	3210	2600		9300	4150	10260		7780	4410	1130		7200	4230	10000
9990	2440	2240		10030	2210	9340		9820	3290	2720		9310	4100	10020		7640	5700	4820		7200	4420	9950
10010	2480	2220		9990	2180	8920		9820	3260	2450		9280	4210	10310		7610	6850	1580		7180	4620	9980
9990	2510	2060		10030	2230	9240		9810	3270	2510		9250	4400	10050		7860	4020	1460		7170	4650	10070
9950	2720	1710		9970	2230	8840		9830	3280	2040		9190	4680	9960		7740	4680	1160		7150	4700	10160
9950	2790	1830		9990	2250	8870		9800	3340	2460		9740	1960	9340		7700	5180	1380		7120	4830	10070
9920	2820	1550		10000	2270	8960		9830	3310	1930		9520	2900	10260		7700	5210	1410		7160	4830	9930
9900	3520	1920		9930	2230	8690		9800	3350	2380		9480	3120	9730		7640	5700	4850		7140	4850	10020
9890	3590	1840		10020	2310	9210		9800	3350	2060		9470	3200	9760		7560	6050	4460		7170	4930	9910
9890	3600	1900		9990	2290	8860		9790	3410	2110		9440	3350	9880		7620	6690	2050		7180	3810	10070
9880	3690	1890		9980	2280	8840		9780	3460	2520		9300	4110	10290		7880	2480	840		7190	4530	9920
9860	3700	1950		10010	2360	9040		9780	3430	2160		9300	4120	10270		7840	4050	1330		7190	4540	9910
9880	3710	1810		10000	2350	8950		9790	3440	2110		9590	2620	9340		7820	4160	1310		7180	4560	10070
9860	3740	1960		9950	2360	8820		9790	3450	1940		9550	2730	9720		7810	4210	1350		7170	4630	10010
9880	3780	1780		9900	2450	8360		9800	3450	1820		9500	2970	9630		7800	4470	1370		7180	4650	9930
9860	3870	1800		10060	2600	9620		9760	3460	2120		9470	3050	9840		7750	4510	1270		7170	4650	9990
9880	3880	1820		10020	1930	9070		9780	3480	1840		9470	3160	9790		7750	4790	1300		7150	4920	10030
9870	3930	1810		10000	2030	9040		9760	3500	2150		9670	2240	9250		7690	5140	1340		7060	4940	10090
9840	3950	1950		10030	2120	9160		9800	3500	1790		9540	2740	9560		7800	4270	1280		7130	4960	10000
9850	4020	1800		9980	2130	8850		9790	3530	1770		9520	2890	9510		7790	4280	1260		7110	4990	10140
9830	4080	1960		9990	2140	8780		9760	3540	2110		9510	2930	9550		7740	4580	1210		7100	5050	10100
9840	4360	1940		9980	2160	8880		9770	3550	2100		9480	3040	9780		7750	4600	1210		7110	5060	10030
10080	1310	3730		9980	2140	8740		9770	3590	1900		9420	3340	9940		7740	4670	1230		7110	5100	9990
10060	1350	3740		9960	2130	8690		9760	3640	1830		9410	3420	9870		7690	4830	1120		6880	6280	10020
10050	1400	3610		9980	2210	8910		9780	3640	1740		9340	3930	10240		7540	6100	4400		7170	3300	10710
10010	1580	3580		9940	2210	8650		9750	3720	2420		9320	4010	10270		7780	4150	1070		7190	4150	10090
9980	1660	3530		9930	2200	8480		9770	3680	1790		9260	4280	10400		7780	4350	1260		7190	4300	10100
9970	1720	3760		9980	2300	8880		9770	3730	1870		9260	4230	10010		7740	4480	1340		7190	4310	9970
9970	1720	3690		9970	2370	8910		9770	3750	1770		9240	4420	10000		7860	3580	1310		7140	4520	10030
9950	1780	3540		9880	2310	8660		9800	3810	1410		9230	4440	10060		7800	4400	1390		7150	4660	10090
9950	1800	3640		9910	2310	8540		9730	3820	2110		9650	2230	9220		7730	4590	1150		7140	4810	10080
9950	1870	3700		9940	990	8000		9740	3840	1740		9580	2490	9760		7720	4650	1150		7120	4910	10020
9920	1930	3540		9940	1140	8130		9740	3860	1810		9530	2860	9480		7710	4730	1150		7190	4090	10040
9970	1890	3190		9980	1480	8750		9780	3920	1290		9520	2920	9580		7710	4880	1270		7180	4250	10020
10100	1900	2350		9980	1600	8730		9710	3930	2120		9450	3170	9890		7850	3740	1380		7180	4350	10100
10090	1970	2390		9960	1360	7370		9740	3920	1650		9440	3250	9820		7780	3940	1010		7180	4420	10040
9990	2090	3050		9970	2010	8600		9740	3930	1740		9290	4110	10340		7800	4180	1280		7160	4480	10030
10030	2090	2850		10020	2100	9200		9770	3980	1340		9760	1840	9260		7790	4270	1330		7180	4600	9890
10070	2040	2450		10000	2170	9110		9700	4080	1710		9710	2060	9430		7760	4480	1220		7160	4690	9990
10070	2040	2400		9990	2230	8960		9680	4130	1750		9650	2210	9510		7740	4530	1210		7150	4720	10060
10020	2120	2950		9950	2170	8670		9670	4190	1720		9570	2450	9710		7700	4630	1190		7120	4800	10030
10020	2120	2850		10020	2270	9330		9650	4290	2100		9510	2730	9870		7840	3760	1480		7110	4850	10110
10070	2060	2360		10010	2290	9190		9640	4280	1660		9530	2700	9620		7760	4390	1270		7100	5110	10040
10070	2070	2090		9930	2120	8220		9650	4280	1600		9560	2690	9450		7800	4430	1490		7090	5150	10090
10040	2130	2550		9970	2270	8930		9640	4330	2160		9560	2680	9330		7770	4560	1400		7180	4150	10020
10060	2110	2270		10000	2300	9120		9630	4310	1740		9500	2820	9870		7720	4680	1240		7170	4350	10000
10050	2160	2010		10000	2310	9080		9600	4340	1630		9510	2910	10270		7740	4740	1330		7170	4590	9910
10020	2210	2390		9930	2170	8350		9620	4470	2120		9500	2900	10040		7860	3360	1410		7150	4680	10020
10040	2200	2230		10000	2330	9100		9590	4430	1780		9490	2920	9670		7760	4190	1120		7150	4760	9870
10000	2260	2600		9940	2330	8750		9580	4430	1670		9500	2940	9620		7760	4330	1180		7120	4820	10140
10010	2260	2450		9910	2310	8520		9550	4550	1800		9510	2920	9520		7720	4640	1230		7100	4970	10050
10020	2260	2290		9930	1090	7460		9550	4650	1740		9510	2960	9600		7690	4760	1130		7060	5260	9910
10050	2260	2060		9990	1850	8850		9540	4850	2120		9490	2990	9810		7770	4410	1320		7180	4520	10100
10000	2330	2640		9980	1580	7480		9550	4900	2130		9500	3010	9590		7800	4090	1360		7150	4550	10080
10020	2290	2210		10000	1910	8920		9530	5000	2060		9480	3050	9640		7710	4480	1120		7150	4740	9900
10030	2280	1970		10020	1950	9190		9520	5050	1950		9460	3100	9820		7770	4330	1310		7120	4790	10160
9980	2390	2470		10010	1690	7590		10110	1750	3380		9440	3220	9820		7790	4330	1420		7110	4830	10060
10010	2370	1940		10010	1780	7630		10110	1810	3340		9440	3260	9830		7740	4410	1260		7120	4870	10020
10000	2420	2280		10000	2110	9130		10140	1840	2880		9430	3320	9910		7750	4460	1340		7110	4880	10050
10000	2470	2210		9960	2080	8680		10120	1980	2260		9430	3360	9840		7720	4580	1180		7110	4880	10090
10000	2470	2160		10000	2140	8990		10070	2000	2480		9390	3570	9900		7740	4580	1290		7090	4950	10020
9940	2770	1640		9970	2020	8270		10080	2120	2230		9310	4060	10280		7680	4680	1130		7080	4970	10130
9940	2810	1700		9950	2080	8550		10090	2140	2190		9300	4060	10240		7550	5970	4510		7090	5000	10080
9880	3470	1990		10010	2180	9120		10030	2220	2370		9300	4090	10330		7550	5990	4630		7100	5050	9930
9880	3510	2030		9980	2170	8840		10040	2230	2160		9250	4300	10630		7500	6120	4550		7080	5070	10060
9870	3570	1840		9960	2160	8810		10000	2230	2600		9180	4550	10390		7800	4160	1350		7160	4100	10180
9860	3650	1990		10010	2240	9280		10050	2310	2100		9170	4630	10050		7770	4210	1410		7080	4880	10120
9840	3660	2010		10010	2250	9190		9990	2300	2430		9740	1970	9230		7790	4450	1520		7100	4870	9990
9850	3790	1920		9940	2230	8780		9990	2330	2330		9580	2600	9310		7880	2590	1750		7110	4990	9910
9860	3840	2020		9980	2290	8960		10020	2350	2050		9490	2860	10130		7780	4080	1280		7140	4510	10010
9870	3850	1720		10000	2330	9170		10010	2350	2190		9520	2780	9550		7750	4360	1300		7150	4670	9960
9850	4000	1890		9920	2240	8630		10030	2370	2010		9470	3000	9760		7780	4340	1450		7130	4740	10000
9850	4030	1950		9910	2210	8310		10010	2390	2110		9480	3000	9630		7710	4580	1250		7100	4780	10080
9850	4050	1700		9960	960	7210		10050	2450	1820		9450	3170	9760		7580	5790	4860		7100	4870	10190
9850	4100	2010		9990	1650	8920		10010	2450	1940		9440	3240	9790		7770	4340	1390		7100	4930	10130
9830	4110	1970		9990	1670	8920		9980	2460	2490		9420	3340	10030		7730	4440	1240		7090	5150	9890
9830	4210	1950		9990	1920	9000		9980	2460	2250		9410	3390	9930		7690	4580	1190		7060	5160	9980
9840	4210	1870		10010	2170	9150		10030	2500	1790		9430	3370	9790		7700	4600	1290		7150	4240	10170
9820	4350	1900		9960	2130	8790		10010	2500	2040		9410	3460	9850		7790	3710	1240		7120	4500	10030
10060	1340	3740		9980	2150	8840		9990	2490	2270		9340	3860	10230		7720	4450	1280		7130	4620	10070
10050	1380	3700		10000	2210	9200		10040	2520	1770		9320	3960	10190		7570	5650	4810		7120	4750	10090
10050	1390	3800		9990	2210	9020		10000	2500	2250		9290	4090	10260		7840	2420	860		7090	4830	10140
10050	1410	3770		9930	2140	8570		10020	2600	1720		9260	4210	10410		7760	4170	1310		7080	5000	10100
10050	1420	3840		9960	2210	8770		9970	2720	1710		9130	4830	10040		7730	4560	1410		7090	5030	9980
10020	1470	3640		9930	2230	8720		9870	3000	2640		9710	2270	8690		7680	4860	1360		7070	5100	10050
10030	1490	3800		9920	2230	8490		9800	3320	2320		9480	3040	9720		7630	4890	1140		7140	4480	10050
10020	1490	3680		9970	2330	8870		9810	3310	2100		9450	3170	9700		7930	2070	2040		7130	4570	10070
10020	1530	3650		9880	2280	8620		9790	3320	2160		9420	3270	9960		7750	4030	1170		7130	4660	9980
10020	1530	3600		9910	2280	8490		9790	3400	1940		9400	3380	9910		7710	4420	1270		7110	4860	9960
10020	1530	3680		9910	2270	8430		9750	3540	2160		9400	3430	9830		7640	4720	1050		7100	4890	9980
10000	1600	3680		9990	2400	9030		9760	3570	2140		9370	3610	9960		7730	4200	1180		7080	5000	9960
9980	1630	3640		10010	2460	9390		9760	3650	2450		9370	3650	9920		7720	4490	1370		7060	5110	10000
10000	1650	3750		9860	2370	8520		9780	3650	1790		9280	4120	10290		7690	4580	1320		7060	5150	9950
9910	1980	3480		10030	2550	9640		9740	3670	2170		9200	4450	10010		7660	4670	1190		7150	4490	9990
9910	2020	3450		9920	1120	8150		9730	3810	2140		9180	4540	10430		7690	4700	1350		7120	4640	10130
10090	1960	2300		9930	1110	7850		9740	3850	1690		9790	1760	8120		7790	3860	1470		7100	4670	10260
9910	2120	3310		9940	1160	7880		9780	3890	1300		9730	1980	7800		7730	4330	1280		7110	4860	9920
10070	2000	2290		9970	1540	8830		9700	3940	2170		9630	2220	9510		7710	4430	1330		7100	4860	9880
9990	2150	3020		10020	1600	7960		9770	3950	1260		9670	2210	8990		7660	4610	1150		7060	4960	10010
10040	2100	2680		9980	1980	8970		9670	4140	2190		9510	2900	9570		7610	4930	1120		7050	5070	10090
10050	2060	2080		9990	1680	7610		9670	4120	1660		9480	2920	9640		7530	5890	4630		7060	5140	9960
9940	2190	3040		10000	1760	7660		9660	4200	1680		9490	2980	9560		7760	3980	1280		6940	5880	6830
9990	2190	2950		9990	2050	9070		9650	4210	1660		9430	3210	9940		7710	4200	1020		7130	3460	9980
9900	2240	3190		9970	2240	8960		9660	4240	1700		9300	4070	10390		7730	4340	1360		7120	3970	10160
10060	2110	2220		9940	2200	8740		9630	4230	1770		9270	4110	10330		7700	4380	1240		7130	3980	10110
9990	2210	2940		9960	2320	8900		9630	4310	1590		9260	4130	10320		7690	4520	1250		7140	4250	9960
9980	2220	2950		9970	2330	8980		9540	4610	1810		9590	2400	9340		7660	4760	1300		7160	4280	9980
9890	2240	3030		10000	2400	9400		9530	4640	1720		9540	2690	9450		7860	2570	1860		7110	4600	10150
9970	2230	2860		9930	1220	8310		9520	4700	1800		9470	2790	10000		7730	4020	1140		7130	4610	9930
10010	2230	2720		9990	1950	8900		9540	4820	2040		9480	2840	9860		7730	4280	1360		7120	4620	9990
9960	2280	2860		10000	2130	9240		9510	4850	1840		9420	3260	9880		7680	4370	1080		7120	4700	10030
9950	2300	2980		9940	2040	8570		9500	5010	1920		9430	3270	9770		7740	4340	1410		7110	4750	9960
9970	2300	2910		9940	2040	8310		9500	5040	1990		9190	4500	10400		7700	4410	1140		7080	4880	10070
9990	2210	2540		10000	2190	9110		9500	5140	2030		9810	1660	8980		7670	4530	1150		7090	4950	9910
10030	2210	2200		9980	2200	9090		10170	1640	2920		9790	1750	8330		7630	5040	1370		7070	5000	10120
9980	2230	2570		9950	2200	8810		10140	1700	3440		9700	1970	9360		7720	4390	1410		7050	5100	10020
9930	2360	3070		9980	2310	9070		10120	1750	3420		9700	2210	8290		7630	4740	1130		7160	4030	10010
9980	2310	2850		9970	2370	9040		10150	1760	2760		9580	2350	9730		7660	4870	1360		7140	4200	9960
10000	2260	2560		9990	2390	9280		10090	1820	3370		9590	2450	9380		7780	3820	1500		7130	4380	9990
9960	2320	2740		9990	2410	9280		10140	1830	2550		9550	2570	9470		7700	4070	1100		7140	4500	9970
10000	2270	2390		9940	2370	8840		10020	2090	3420		9570	2570	9260		7710	4140	1240		7070	4540	10030
9960	2350	2710		9980	2440	9220		10090	2090	2100		9540	2650	9490		7720	4420	1410		7120	4560	9950
10020	2310	2090		10000	2500	9430		10070	2090	2260		9520	2800	9410		7730	4410	1500		7130	4560	9830
10020	2300	1890		9860	2600	8320		10080	2090	2220		9450	2920	10250		7620	4900	1270		7090	4630	10200
9980	2360	2530		9920	1100	7650		10050	2180	2190		9490	2850	9590		7770	3740	1520		7110	4640	9970
9950	2390	2670		9970	1720	8870		10040	2190	2270		9480	2910	9680		7760	3880	1420		7120	4690	9810
10010	2350	2190		9980	1780	8940		10040	2220	2290		9440	3210	9790		7710	3990	1140		7090	4830	9900
9990	2370	2400		9980	1950	8990		10070	2230	2040		9410	3310	9840		7660	4450	1380		7070	4850	10140
9980	2390	2400		9980	2000	8940		10030	2260	2180		9400	3350	10020		7680	4560	1340		7050	5080	10010
10000	2400	2320		9960	1970	8560		10000	2270	2480		9410	3350	9910		7690	4630	1420		7040	5180	9920
9990	2440	2470		9970	2070	8840		10020	2280	2330		9390	3450	9940		7580	4910	1070		7050	5190	10010
10000	2440	2360		9990	1850	7670		9990	2280	2620		9370	3590	9950		7740	4200	1540		7130	4480	9950
10000	2440	2190		9950	2130	8750		9980	2330	2690		9260	4160	10340		7620	4540	980		7120	4570	9950
9980	2410	1860		9970	2180	8990		10040	2360	1930		9230	4240	10330		7650	4520	1220		7100	4700	9990
9990	2460	1990		9960	2240	8970		10010	2370	2150		9030	5260	9950		7630	4740	1170		7080	4900	9920
9970	2550	1730		9950	2250	8860		10060	2410	1820		9590	2310	9610		7610	4780	1210		7040	4980	10160
9960	2640	1870		9950	2260	8840		9980	2410	2170		9590	2320	9630		7740	3910	1560		7060	4980	9970
9940	2690	1570		9930	2310	8800		9970	2440	2300		9550	2520	9550		7630	4480	990		7050	5020	10070
9940	2710	1620		9970	2380	9060		10020	2480	1860		9570	2530	9360		7670	4590	1470		7060	5050	9890
9870	3470	2050		9900	2360	8650		9990	2460	2430		9540	2620	9390		7710	4170	1360		7290	2030	9300
9890	3470	1940		10000	2480	9450		9990	2470	2390		9430	3200	9850		7740	4170	1470		7130	4480	9940
9850	3540	2040		10000	2520	9390		10040	2510	1790		9420	3220	9770		7700	4330	1390		7050	4790	10040
9890	3520	1860		9860	2460	8460		9970	2700	1770		9400	3300	10010		7700	4360	1400		7030	4850	10050
9880	3530	1960		9990	1840	9030		9960	2760	1750		9380	3440	9980		7660	4400	1220		7080	4900	9980
9870	3540	1910		9970	1870	8810		9950	2760	1720		9360	3440	9880		7660	4510	1200		7080	4920	9880
9850	3590	1960		9940	2040	8730		9950	2810	1560		9860	1380	8950		7690	3930	1060		7090	4930	9750
9850	3720	1970		9970	1780	7600		9840	3130	2420		9780	1630	9180		7720	4010	1320		7040	4960	10090
9860	3710	1730		9990	2120	9140		9800	3210	2100		9720	1960	7870		7720	4030	1380		7120	3600	9970
9860	3720	1930		9960	2090	8840		9820	3240	2080		9620	2220	9610		7730	4060	1390		7090	4640	9920
9870	3790	1870		9940	2060	8450		9800	3270	2000		9570	2400	9480		7690	4200	1280		7080	4650	10040
9830	3810	2020		9990	2250	9260		9800	3310	2130		9440	3080	9850		7680	4230	1240		7100	4670	10020
9870	3830	1760		9940	2070	8090		9780	3340	2350		9430	3160	9720		7640	4550	1230		7060	4820	10170
9870	3840	1680		9910	2180	8390		9820	3320	1900		9410	3320	10160		7630	4670	1290		7050	4830	9970
9840	3910	2000		10000	2310	9330		9810	3330	1880		9410	3350	10170		7620	4710	1270		7030	5030	10140
9860	3930	1700		9880	2240	8530		9810	3350	2010		9250	4190	10440		7580	5150	1350		7040	5040	10010
9860	3960	1900		9980	2350	9300		9780	3350	1900		9200	4370	10440		7860	2210	1950		7070	4610	10010
9850	4040	1830		9950	2350	8980		9800	3350	1940		9750	1750	9160		7740	3630	1300		7090	4690	10000
9840	4160	1810		9910	2310	8710		9750	3450	2180		9690	1990	9100		7650	4170	990		7090	4730	9840
9820	4240	2030		9890	2270	8460		9780	3460	1920		9630	2160	9530		7710	4120	1360		7080	4740	9970
9830	4270	1980		9890	2330	8600		9800	3520	1820		9630	2170	9420		7640	4200	940		7070	4860	9900
9800	4350	1220		9920	2390	8830		9750	3590	2130		9610	2240	9440		7670	4210	1220		7110	3760	9950
10050	1380	3610		9890	2360	8550		9740	3600	2190		9450	3060	9730		7680	4540	1430		7130	4120	10000
10030	1410	3730		10000	2580	9570		9760	3590	1860		9410	3230	9850		7660	4560	1360		7100	4540	10100
10040	1430	3740		9900	970	7510		9770	3610	1840		9390	3320	9860		7600	4700	1170		7100	4540	10010
10040	1440	3550		9960	1800	8910		9760	3650	1810		9390	3330	9850		7590	4710	1160		7090	4690	9900
9970	1660	3650		9970	2020	8930		9740	3860	1770		9400	3420	9910		7600	4790	1180		7080	4770	9890
10090	1940	2280		9980	2110	9190		9730	3880	1720		9370	3460	10010		7630	4350	990		7070	4800	10010
10060	2030	2260		10000	2180	9250		9710	3930	2070		9270	4020	10230		7620	4780	1320		7080	4790	9820
10010	2120	2890		9930	2090	8560		9710	3960	1750		9280	3980	10000		7560	5020	1290		7060	4810	9890
9970	2160	3020		9980	2200	9220		9690	4050	2160		9600	2220	9560		7500	5830	4720		7070	4820	9950
9950	2150	2950		9960	2160	8920		9690	4070	1630		9470	2780	9700		7720	4250	1480		7050	4860	10100
10040	2090	2270		9960	2180	8890		9670	4100	2140		9510	2750	9470		7640	4560	1320		7030	4940	10160
10020	2130	2690		9940	2200	8760		9670	4120	2120		9470	2880	9660		7600	4640	1170		7030	4980	10060
10030	2130	2560		9910	2190	8650		9670	4140	2210		9450	3050	9670		7440	5970	4550		7040	4990	9940
9960	2200	2890		9970	2270	9200		9660	4170	1710		9400	3310	9830		7860	1990	1970		7020	5070	10110
10010	2190	2780		9980	2290	9280		9620	4340	1610		9380	3380	9930		7710	3990	1380		7030	5130	9990
10010	2190	2720		9910	2200	8590		9600	4390	1620		9140	4640	10010		7650	4370	1230		7120	3610	9830
9900	2320	3150		9900	2220	8590		9560	4460	1650		9660	2040	9400		7620	4490	1300		7120	4340	9920
10010	2220	2620		9890	2170	8230		9540	4900	2080		9630	2160	9360		7600	4610	1140		7110	4420	9950
9950	2280	2910		9950	2330	9040		9520	4990	2100		9610	2180	9660		7640	4580	1410		7110	4550	9850
9940	2260	2730		9910	2230	8450		9500	5010	1950		9620	2220	9230		7660	4620	1440		7050	4920	9970
9980	2310	2900		9900	2290	8650		9520	5060	2180		9570	2360	9470		7560	4870	1170		7030	5080	9960
10030	2230	2220		9980	2380	9130		9500	5020	1860		9570	2440	9330		7700	4120	1420		7090	4500	9990
9990	2330	2820		9920	2350	8800		10090	1810	3340		9580	2420	9250		7680	4200	1420		7090	4600	9820
10020	2250	2340		9890	2340	8710		10130	1840	2590		9490	2780	9570		7640	4400	1200		7080	4640	9990
10030	2260	2220		9850	2270	8310		10110	1920	2440		9500	2770	9500		7590	4560	1210		7070	4650	9910
9990	2290	2480		9880	2330	8440		10080	2000	2500		9510	2750	9430		7660	4550	1410		7060	4830	10000
9980	2330	2590		9870	2390	8510		10080	2050	2270		9440	2870	10050		7640	4650	1380		7040	4910	10000
9980	2340	2640		9910	1090	8110		10030	2140	2640		9470	2790	9580		7610	4740	1290		7030	4950	10110
9990	2360	2630		9900	1000	7520		10020	2150	2600		9440	2950	10260		7850	2180	2040		7000	5080	9990
9970	2370	2300		9930	1340	7340		10010	2220	2620		9430	3030	9890		7700	3860	1300		7080	4240	10150
10000	2370	2150		9960	1710	8900		10000	2240	2480		9430	3070	9740		7660	4160	1270		7030	4570	9970
9950	2410	2380		9950	1710	8850		10000	2260	2520		9440	3080	9680		7640	4430	1340		7010	4880	10050
9980	2400	2230		9990	2040	9290		10050	2280	2090		9390	3200	9850		7670	4430	1530		7030	4910	10040
9980	2420	2410		9950	1990	8720		10050	2310	1980		9360	3330	9830		7570	4760	1240		7030	4970	10020
10000	2420	2140		9950	1740	7600		9990	2300	2630		9380	3370	10000		7720	3610	1300		7020	4990	10080
10000	2390	1780		9950	2020	8090		9960	2280	2400		9360	3460	9850		7700	3960	1390		7010	5030	10020
9910	2980	1510		9980	2260	9170		10030	2350	2020		9330	3610	9930		7670	4000	1240		7080	4340	10060
9870	3450	1920		9910	2130	8290		9980	2340	2750		9320	3800	9990		7590	4600	1210		7080	4400	10020
9870	3480	2020		9940	2240	8830		9970	2340	2660		9250	4090	10290		7610	4590	1300		7080	4460	9970
9870	3580	1870		9930	2110	8190		9960	2370	2440		9200	4300	10370		7620	4600	1370		7050	4660	10160
9850	3580	1750		9960	2290	9160		9960	2390	2190		9190	4340	10430		7610	4640	1340		7060	4710	9900
9850	3610	1800		9980	2300	9370		9980	2390	2440		9780	1650	8030		7610	4640	1310		7040	4730	10080
9840	3630	1970		9940	2310	8970		9980	2400	2390		9650	2190	9060		7550	4770	1130		7040	4770	10070
9870	3650	1800		9920	2290	8820		9980	2450	2370		9530	2640	9350		7690	4100	1480		7000	4760	10090
9850	3670	1980		9900	2260	8680		9960	2460	2260		9450	2790	10270		7670	4260	1350		7030	4800	10150
9850	3750	1990		9900	2260	8590		10010	2490	2060		9440	2930	9850		7620	4500	1340		7030	4880	9990
9850	3770	2020		10000	2530	9580		10010	2490	1930		9420	3050	9760		7560	4630	1250		6990	5120	10100
9850	3780	1830		10020	2700	9700		9970	2470	2530		9420	3100	9870		7730	3530	1460		7060	4620	9900
9860	3780	1730		9890	1040	8060		9980	2550	1730		9370	3450	10190		7690	4080	1430		7060	4620	9960
9860	3820	1850		9900	1050	8030		9970	2550	2210		9360	3440	10110		7640	4170	1120		7040	4650	10000
9850	3900	1940		9950	1630	8900		9990	2630	1680		9380	3400	9910		7680	4100	1510		7060	4660	9980
9830	3950	1990		9920	1410	7460		9980	2650	1880		9210	4180	10320		7690	4180	1410		7060	4710	9980
9860	3990	1760		9990	2010	9130		9980	2680	1790		9200	4210	10360		7640	4570	1490		7010	4770	10130
9830	4050	1910		9950	2120	8880		9980	2690	1660		9760	1840	8480		7550	4910	1260		7060	4780	9910
9820	4120	1820		9940	2010	8300		9950	2810	1720		9640	2030	9360		7900	1250	2210		7030	4800	10010
9850	4110	1700		9930	2080	8630		9940	2820	1670		9710	2060	8390		7650	4420	1380		7020	4900	10130
9830	4160	1990		9930	2240	8940		9850	3090	2530		9530	2620	9340		7590	4500	1170		7030	4950	9780
9850	4240	1760		9900	2110	8120		9860	3100	2300		9420	2920	10030		7640	4460	1420		7020	4990	10000
9810	4250	2060		9890	2180	8260		9800	3250	2400		9290	3850	9990		7880	1520	1920		6980	5120	9960
9820	4240	1940		9870	2280	8510		9800	3290	2120		9220	4200	10330		7600	4470	1250		7060	4600	9990
9830	4310	1830		9880	2340	8680		9790	3340	2250		9710	1990	8660		7630	4490	1430		7050	4730	10000
9810	4350	1960		9900	2360	8750		9790	3360	2040		9570	2260	9510		7520	5150	1360		7010	4810	10110
9810	4460	1980		9880	2280	8340		9780	3360	2090		9520	2610	9400		7850	1940	2210		7040	4800	9920
10050	1350	3700		9870	2330	8500		9800	3380	1850		9450	2730	10040		7790	2420	2020		7020	4840	10140
10020	1430	3760		9990	2460	9470		9760	3470	2670		9520	2650	9500		7720	3420	1500		6990	4830	9980
10010	1430	3600		10010	2670	9710		9770	3480	2540		9490	2740	9480		7680	3930	1380		7010	4950	9990
10020	1440	3620		10010	2750	9750		9760	3480	2170		9370	3380	10110		7700	3980	1410		7010	5000	10050
10010	1470	3610		9880	1030	7720		9770	3470	1770		9250	4010	10280		7680	4030	1520		7010	5060	9900
10020	1470	3550		9930	1510	8660		9740	3680	2460		9230	4120	10410		7620	4180	1130		7010	5120	10010
10020	1460	3780		9940	1760	8900		9750	3650	2120		9220	4130	10290		7670	4190	1350		6980	5120	10050
10010	1480	3720		9920	2000	8440		9760	3670	1800		9210	4180	10400		7660	4190	1400		7200	2040	9810
9950	1720	3710		9980	2150	9300		9740	3760	1800		9210	4210	10400		7620	4390	1330		7130	3170	9550
9920	1840	3510		9970	2170	9180		9720	3820	2190		9720	1940	8520		7600	4450	1210		7070	4390	9980
9910	1890	3490		9890	2050	8330		9740	3830	1770		9690	1960	7750		7660	4480	1480		7070	4480	9880
10080	1900	2230		9970	2190	9130		9740	3890	1640		9700	2050	8710		7620	4530	1380		7050	4570	9940
10070	1990	2250		9970	2220	9300		9710	3900	1710		9490	2650	9600		7540	4670	1160		7020	4750	9970
10070	2050	2230		9960	2210	9010		9710	4020	1640		9490	2680	9550		7620	4640	1440		7040	4770	9810
10050	2080	2130		9900	2120	8520		9690	4060	1700		9480	2780	9530		7590	4660	1330		7000	4930	10030
10030	2120	2540		9910	2230	8800		9670	4100	1590		9360	3390	10070		7570	4670	1240		6980	4980	10130
9930	2230	3100		9970	2290	9230		9660	4160	2190		9330	3570	9950		7660	4110	1410		6950	5100	10020
10020	2170	2830		9940	2280	9080		9670	4140	1700		9540	2440	9410		7640	4180	1280		7000	5090	9840
9920	2220	3030		9940	2290	9030		9620	4270	1610		9510	2660	9310		7620	4350	1280		6990	5150	10050
9910	2270	3050		9950	2320	9300		9620	4350	2220		9490	2810	9440		7580	4420	1170		7070	4430	9930
9920	2290	3110		9900	2210	8420		9560	4490	1690		9440	2990	9630		7630	4380	1420		7060	4450	9950
10010	2230	2470		9970	2350	9330		9520	4670	1790		9370	3360	9860		7620	4530	1460		7050	4640	9870
9960	2330	2890		9920	2340	8900		9570	4740	2220		9330	3510	10070		7530	4850	1190		7030	4780	9930
9980	2270	2530		9910	2310	8730		9510	4740	1770		9190	4230	10050		7530	4870	1250		7020	4810	10040
9980	2440	2390		9920	2350	8850		9520	5020	2140		9680	2100	8240		7440	5370	860		7030	4800	9970
9980	2450	2250		9870	2250	8330		9490	5030	1910		9570	2300	9240		7700	3770	1530		7010	4830	10030
9980	2430	1930		9880	2310	8520		9500	5090	2130		9510	2520	9480		7640	4100	1250		6990	4900	10190
9990	2460	1920		9920	2400	8930		10230	1350	3230		9540	2490	9210		7600	4190	1050		7010	4900	10020
9980	2540	2110		9860	2320	8400		10180	1600	2880		9380	3150	9930		7590	4380	1140		7050	4480	9930
9980	2540	2080		9870	2330	8410		10170	1600	2930		9380	3170	9920		7590	4440	1350		7020	4600	9940
9960	2550	1680		9970	2450	9310		10090	2050	2210		9380	3170	9860		7370	6100	4420		7020	4680	9970
9950	2610	1790		9900	1080	8170		10050	2070	2640		9360	3290	10050		7810	1760	1650		7030	4710	9940
9930	2740	1800		9890	1100	7880		10080	2110	2160		9360	3310	9930		7690	3680	1460		7000	4960	10030
9930	2850	1810		9900	1270	7440		10050	2130	2220		9330	3490	10080		7680	3920	1370		6990	5070	9960
9890	3450	2070		9920	1460	7430		10050	2170	2170		9340	3480	9890		7670	3950	1440		7070	4190	9980
9880	3500	2070		9940	1840	9040		10020	2190	2380		9200	4170	10360		7640	4030	1280		7050	4570	10040
9880	3500	1810		9920	2000	8530		10010	2210	2430		9160	4320	10450		7650	4280	1560		7020	4690	10010
9870	3550	1870		9940	2110	8850		10020	2250	2250		9190	4240	10060		7640	4390	1460		7040	4700	9850
9860	3570	2020		9920	2070	8640		10010	2240	2430		9150	4360	10430		7520	4650	1110		6990	4920	10150
9870	3600	1930		9930	2090	8690		10000	2260	2460		9110	4580	10440		7650	3960	1350		7000	4920	10050
9840	3610	2050		9940	1990	8130		10020	2290	2230		9680	1890	7870		7570	4040	890		6990	4950	9960
9820	3680	1770		9940	2150	8790		10030	2310	2030		9650	2120	8910		7630	4330	1430		6970	4990	10110
9860	3660	1710		9900	2140	8510		9990	2300	2540		9580	2370	9180		7620	4480	1470		6940	5010	10010
9850	3710	2000		9920	2230	8850		9990	2320	2350		9480	2690	9520		7620	4540	1500		6970	5170	9930
9820	3810	1730		9920	2280	8910		10050	2380	1900		9400	3080	9770		7600	4650	1450		7050	4040	10100
9820	3870	2040		9960	2350	9280		9990	2380	2330		9370	3200	10020		7540	4660	1360		7040	4530	9930
9860	3960	1720		9920	2350	9430		9970	2380	2570		9370	3280	9850		7500	4690	1200		7030	4620	9950
9840	3970	2030		9880	2200	8250		9960	2370	2550		9350	3360	9910		7530	4700	1160		7030	4730	9930
9840	4150	1880		9880	2230	8360		9940	2400	2350		9320	3480	9930		7530	4710	1210		7010	4750	9930
9830	4210	1980		9880	2320	8600		9980	2430	2190		9310	3560	9970		7500	5210	1370		6970	4980	10060
9830	4260	1730		9870	2300	8340		9970	2430	2290		9230	4100	10350		7650	3660	1160		6980	4970	9950
9830	4270	1810		9890	1110	7970		9990	2480	2100		9170	4320	10400		7650	3880	1450		6970	5000	10070
9820	4380	2000		9900	1130	7270		9970	2490	2120		9140	4410	10370		7600	4020	1070		6940	5220	9950
9820	4380	1930		9960	1880	9120		10010	2510	1800		9080	4650	10400		7600	4130	1220		7050	3810	9970
9680	5300	2330		9960	1890	9040		9950	2510	2070		9050	4830	10020		7590	4300	1160		7050	4310	10050
10040	1380	3670		9930	2120	8860		9950	2790	1550		9630	2130	8980		7590	4450	1290		7030	4380	9950
10020	1440	3650		9920	2180	8900		9940	2850	1570		9530	2310	9720		7580	4440	1330		7030	4430	10120
9930	1800	3530		9910	2100	8310		9840	3110	2410		9450	2630	10210		7540	4750	1220		7030	4540	9950
9920	1810	3560		9940	2260	9050		9830	3140	2470		9480	2610	9450		7690	3580	1610		7020	4630	10020
9890	1980	3620		9890	2180	8520		9820	3170	2100		9410	2880	10370		7600	4230	1180		7010	4660	10060
9890	2080	3480		9880	2160	8170		9810	3210	2130		9430	2880	9680		7610	4310	1370		6990	4800	10090
10050	1950	2460		9940	2340	9100		9800	3270	2530		9410	2990	9670		7630	4350	1540		7010	4790	9940
10070	1960	2440		9870	2240	8370		9800	3230	1990		9260	3900	10010		7570	4460	1220		6960	4880	10030
10060	2000	2280		9880	2310	8630		9790	3260	2120		9450	2560	9910		7550	4500	1140		6970	5020	9970
10000	2110	2970		9860	2300	8430		9780	3280	2150		9500	2540	9450		7590	4640	1500		6930	5050	10010
9990	2130	2940		9910	2380	8820		9780	3360	2660		9530	2510	9310		7520	4710	1190		7050	3880	9960
10040	2050	2170		9870	2340	8560		9780	3290	1910		9500	2560	9310		7580	3900	970		6980	4450	10550
10050	2050	2080		9920	1470	8830		9800	3330	2020		9480	2610	9500		7570	4400	1340		7040	4520	9890
10040	2080	2240		9920	1630	8840		9790	3340	2160		9480	2690	9430		7590	4460	1380		7030	4640	9880
10060	2100	2290		9930	2110	8840		9740	3400	2210		9440	2760	9630		7550	4520	1230		7020	4690	9920
9940	2180	2860		9890	2100	8380		9790	3420	1790		9360	3170	9840		7530	4650	1220		7000	4770	9990
9970	2220	3000		9910	2270	8850		9790	3440	1840		9350	3250	9890		7600	4660	1550		6990	4860	10040
10030	2140	2140		9880	2160	8250		9760	3460	1810		9350	3410	9890		7560	4690	1370		7000	4860	9860
10030	2200	2080		9890	2330	8760		9770	3500	1920		9320	3550	10070		7490	5040	1300		6940	4970	10110
9980	2290	2780		9870	2330	8590		9770	3540	1740		9320	3510	9900		7630	3990	1300		6950	5080	10090
9980	2290	2660		9880	1080	7420		9750	3560	2020		9160	4310	10380		7640	4130	1600		6940	5190	10050
9970	2270	2650		9890	1370	8630		9730	3740	2150		9160	4340	10370		7630	4280	1530		7050	3850	9970
9980	2270	2590		9960	2010	9140		9740	3720	1740		9590	2090	9580		7610	4390	1430		7030	4400	10090
9970	2340	2840		9920	1970	8560		9710	3860	1730		9470	2500	9910		7510	4530	1190		7020	4420	10060
9990	2300	2650		9940	1770	7600		9660	4180	1690		9500	2460	9490		7500	4820	1240		7010	4650	9940
9960	2340	2770		9900	2030	8490		9530	4520	1690		9470	2670	9500		7710	2920	1820		7000	4770	10050
9980	2320	2610		9950	2160	9200		9500	4690	1760		9450	2800	9560		7570	4580	1470		6960	5030	10040
9910	2370	2750		9910	2020	8230		9470	4840	1730		9450	2830	9570		7500	5210	1440		6930	5290	9960
9980	2330	2520		9940	1850	7640		9510	4980	2190		9400	2910	9930		7690	3080	1530		7020	4580	9920
9990	2340	2450		9910	2090	8600		9500	5000	2060		9420	2900	9720		7670	3620	1590		7000	4620	9970
9980	2360	2390		9890	2090	8550		9500	5110	2110		9320	3490	9990		7670	3770	1580		7000	4660	10010
9990	2360	2070		9880	2110	8550		10170	1610	3080		9290	3630	10040		7610	4160	1290		6970	4730	10140
9980	2410	2340		9890	2150	8700		10120	1900	2330		9290	3630	10020		7590	4200	1180		6990	4750	9960
9990	2410	2040		9910	2180	8780		10020	2000	3350		9230	3960	10300		7560	4320	1200		6970	4850	10080
9980	2450	2170		9890	2180	8690		10110	2040	2160		9220	4090	10340		7610	4360	1410		6930	5050	10100
9980	2460	1870		9960	2260	9300		10080	2180	1980		9190	4200	10390		7540	4570	1280		7030	4400	10020
9930	2780	1820		9910	2270	8900		10060	2210	2100		9040	4860	10000		7600	4040	1260		7010	4550	9890
9920	2820	1780		9950	2340	9240		10010	2210	2560		9540	2270	9500		7600	4280	1310		7000	4570	10060
9880	3410	2060		9900	2300	8800		9990	2230	2760		9570	2250	9110		7590	4350	1450		7000	4590	10010
9870	3430	1940		9940	2360	9070		10050	2250	1960		9570	2290	9160		7550	4480	1310		6980	4670	9890
9860	3460	2050		9920	2370	9010		9990	2240	2450		9450	2550	9880		7540	4560	1300		6990	4770	9950
9870	3500	1990		9900	2360	8870		9970	2270	2650		9370	3180	9830		7520	4590	1190		6980	4820	9940
9870	3490	1840		9930	2380	9040		10000	2290	2140		9340	3330	10170		7530	4650	1270		6950	5000	9960
9860	3590	2060		9910	2400	8980		9950	2350	2780		9220	3920	10000		7490	4710	1130		6940	5030	10060
9840	3630	1930		9930	2420	9180		9980	2350	2510		9180	4160	10290		7490	4780	1200		6870	5110	9990
9860	3630	1900		9950	2420	9260		10020	2370	1950		9590	2050	9450		7660	3630	1580		7020	4340	10060
9840	3650	2060		9930	2450	9090		10010	2380	2050		9620	2180	8820		7580	3970	1120		7030	4360	9900
9850	3700	2020		9940	2450	9210		9980	2410	2110		9510	2500	9360		7620	4100	1500		7010	4510	9990
9840	3820	1960		9950	2490	9210		9950	2400	2540		9400	2900	10420		7570	4260	1260		7010	4610	9860
9820	3950	2050		9860	2420	8500		9960	2410	2240		9360	3140	10050		7520	4410	1000		6950	4860	9930
9840	3950	2020		9950	1750	9040		9950	2460	2470		9390	3090	9700		7600	4340	1480		6980	4880	9830
9840	3970	1810		9920	1510	7510		9940	2520	2160		9370	3100	9770		7610	4370	1560		6970	4890	10000
9830	4040	2020		9940	1920	8270		9970	2540	1970		9310	3590	10210		7590	4420	1470		6920	5040	9980
9840	4040	1930		9940	1740	7580		9990	2570	1890		9310	3550	10000		7500	4760	1230		6940	5080	10010
9840	4100	1880		9930	1970	8100		9990	2590	1880		9170	4200	10360		7350	7040	1720		6930	5120	10060
9830	4160	1890		9900	2050	8530		9970	2600	1950		9160	4270	10250		7830	1340	2150		7010	4150	10000
9820	4170	1760		9900	2070	8570		9960	2660	1730		9060	4700	10460		7530	4110	940		7020	4340	10030
9840	4180	1780		9950	2180	9210		9950	2730	1810		9060	4700	10030		7610	4120	1420		7030	4350	9810
9820	4250	2000		9950	2190	9200		9830	3130	2070		9550	2110	9560		7540	4330	1090		6990	4630	10090
9840	4280	2030		9890	2080	8480		9830	3170	2050		9570	2280	9080		7610	4300	1510		6970	4780	10080
9820	4340	2010		9920	1940	7770		9820	3180	2020		9400	2800	10230		7550	4630	1390		6950	4780	10180
9790	4420	2040		9890	2180	8740		9810	3240	2410		9390	2950	10430		7470	5430	1500		6960	4810	9920
9800	4430	1870		9900	2070	8140		9820	3260	1930		9340	3190	9900		7620	3710	1340		6940	4840	10100
9800	4450	2020		9870	2200	8440		9790	3270	2080		9320	3380	9900		7540	3800	850		6950	4840	10130
9800	4480	1950		9920	2320	9120		9780	3340	2310		9310	3460	9920		7610	4130	1400		6960	4870	10100
10060	1250	3810		9900	2340	9020		9770	3410	2180		9150	4240	10370		7580	4310	1340		6960	4890	10090
10040	1310	3860		9950	2370	9410		9790	3400	1870		9680	1740	9250		7550	4310	1270		6950	4920	9950
10050	1330	3680		9950	2400	9430		9770	3410	2090		9540	2240	9380		7510	4550	1230		6940	4990	10180
10050	1330	3740		9930	2420	9140		9790	3410	1830		9530	2360	9250		7550	4540	1350		6950	4990	10030
10030	1380	3810		9830	2420	8420		9780	3420	1950		9440	2610	9930		7550	4570	1440		6990	4700	9830
10030	1390	3760		9860	970	7660		9780	3420	1890		9480	2590	9410		7530	4630	1370		6970	4710	9900
10010	1430	3730		9880	1290	8310		9760	3420	2140		9470	2640	9320		7530	4680	1410		6960	4760	10010
9990	1470	3830		9890	1550	7480		9760	3430	1920		9410	2860	9720		7500	4710	1360		6930	5200	9840
10010	1500	3530		9920	1590	7560		9750	3480	2200		9390	2880	9790		7500	4760	1290		7030	3120	9800
10000	1500	3590		9910	1950	8540		9750	3510	2470		9380	2990	9770		7500	4800	1250		7000	4110	10140
9970	1630	3710		9910	2050	8760		9790	3480	1790		9370	3060	9800		7600	3850	1230		7000	4370	10060
9950	1630	3670		9910	1990	8300		9800	3600	1530		9300	3450	10070		7630	3890	1540		6950	4720	10160
9970	1630	3730		9900	2070	8600		9720	3660	2190		9280	3500	9970		7590	4040	1330		6960	4770	10010
9950	1750	3630		9900	2060	8390		9720	3660	2130		9300	3520	9930		7570	4120	1250		6930	5010	9930
9930	1750	3610		9900	2060	8300		9720	3690	2210		9290	3580	9940		7590	4160	1380		6910	5070	10110
10070	1980	2360		9920	2210	9020		9710	3730	2200		9280	3600	10010		7530	4320	1240		7010	3720	10010
10070	1970	2320		9920	2050	8150		9740	3720	1680		9270	3660	10060		7570	4390	1460		6960	4710	10080
10010	2120	2900		9920	2220	8950		9710	3800	2190		9200	4060	10390		7480	4640	1070		6960	4710	10020
9940	2190	3070		9880	2140	8470		9720	3830	2120		9150	4210	10330		7460	4810	1110		6940	4800	10140
10000	2150	2580		9920	2240	9050		9700	3840	2160		9640	1960	8780		7460	4850	1160		6960	4840	9920
10020	2180	2770		9880	2130	8360		9770	3870	1240		9560	2210	9130		7770	1890	2020		6920	5080	9950
10030	2140	2390		9960	2260	9410		9770	3890	1290		9450	2620	9570		7530	3770	860		6910	5170	9920
10010	2170	2600		9940	2290	9250		9710	3890	1750		9390	2970	9720		7540	4380	1290		7030	3290	9760
10000	2210	2710		9910	2280	9000		9670	4040	2180		9380	3010	9740		7530	4430	1270		7010	4280	9930
10010	2150	2080		9890	2280	8820		9640	4220	1580		9360	3040	9830		7520	4520	1240		6990	4440	9900
10030	2150	2040		9870	2190	8170		9610	4300	1610		9350	3180	9800		7550	4500	1470		6980	4520	9990
9930	2290	2790		9920	2380	9150		9590	4360	1600		9310	3390	9950		7460	4590	1200		6980	4580	9960
9910	2330	2980		9870	2320	8710		9540	4530	1660		9290	3560	9940		7540	4620	1420		6960	4710	9870
9980	2310	2830		9910	2380	8960		9560	4720	2150		9240	3730	10030		7480	4870	1310		6930	4870	10150
9930	2310	2890		9940	2400	9410		9560	4800	2590		9180	4120	10360		7820	1090	2370		6900	4970	10080
9970	2300	2810		9930	2400	9050		9540	4830	2200		9070	4550	10370		7640	3420	1460		6910	5000	10050
10010	2250	2230		9900	2390	8900		9510	4960	2130		9010	4870	10020		7640	3730	1570		6890	5020	10050
9970	2320	2360		9850	2330	8540		9470	5170	2000		9700	1670	7900		7590	3890	1360		6890	5090	10020
10000	2330	1960		9830	2400	8510		9470	5240	2080		9530	2200	9680		7550	4130	1200		6890	5180	9930
9980	2350	1980		9870	1230	8370		9470	5280	2040		9480	2440	9590		7560	4170	1180		6980	4350	9920
9960	2410	2440		9870	1330	7430		10130	1750	2670		9380	2720	10110		7600	4150	1430		6970	4630	9940
9970	2410	2480		9920	1770	8950		10060	2010	2400		9400	2940	9650		7580	4180	1350		6950	4650	10030
9950	2430	2520		9880	1440	7400		10050	2120	2250		9380	2980	9760		7590	4290	1600		6960	4690	9870
9980	2420	2160		9900	2010	8600		10010	2190	2710		9320	3300	9870		7540	4390	1260		6920	4910	9910
9970	2450	2410		9880	2030	8590		9990	2230	2650		9290	3410	10070		7510	4420	1170		6920	4950	10060
9960	2460	2390		9900	2030	8540		9990	2260	2320		9320	3400	9890		7540	4720	1480		6920	5030	9990
9980	2430	1910		9960	2160	9260		9990	2280	2340		9280	3490	9910		7290	7470	2360		6970	4420	9970
9980	2470	2310		9920	1870	7660		9970	2280	2700		9140	4270	10400		7590	3980	1320		6940	4590	9920
9960	2460	2020		9910	2000	7960		10010	2320	2030		9130	4250	10340		7580	3990	1300		6890	4760	9980
9980	2440	1860		9900	2080	8290		9990	2300	2400		9120	4350	10470		7590	4030	1430		6930	4820	10020
9980	2460	1940		9950	2240	9430		10000	2320	2190		9610	1860	9270		7550	4100	1130		6930	4920	9830
9970	2490	2310		9910	1980	7770		9970	2320	2560		9490	2490	9330		7570	4330	1400		6910	4930	10110
9970	2530	2020		9880	2150	8450		10010	2440	1980		9400	2870	9570		7550	4370	1360		6970	4320	10080
9970	2570	2080		9940	2310	9330		10000	2470	1780		9330	3300	10310		7570	4420	1440		6980	4370	10000
9960	2560	1940		9870	2240	8630		9960	2450	2340		9300	3390	9900		7560	4450	1480		6980	4420	9930
9920	2710	1620		9860	2250	8560		9960	2470	2130		9260	3630	9970		7520	4510	1320		6970	4460	9980
9930	2730	1770		9920	2370	9090		9970	2490	1910		9110	4320	10330		7560	4500	1440		6960	4560	9950
9880	3360	2030		9840	2370	8470		9980	2500	1960		9530	2340	9050		7510	4590	1270		6940	4690	10090
9860	3520	1880		9950	2480	9600		9960	2570	2050		9410	2750	9610		7500	4590	1300		6930	4720	10110
9850	3610	1850		9870	1230	8430		9960	2590	2020		9410	2810	9590		7470	4620	1170		6920	4820	10060
9830	3730	2080		9880	1270	8360		9960	2640	1990		9390	2930	9630		7480	4630	1230		6890	4940	9960
9840	3800	2000		9880	1310	8600		9930	2790	1710		9300	3400	9860		7450	4810	1210		6900	4980	9960
9850	3850	1770		9930	1780	9040		9920	2820	1570		9270	3570	10070		7590	3710	1280		6900	5070	9910
9850	3870	1890		9930	1960	9020		9900	2920	1560		9250	3710	10180		7590	3870	1380		6880	5090	9990
9820	3890	2060		9910	1880	8340		9820	3150	2650		9510	2360	9200		7570	4260	1360		6900	5130	9780
9820	3880	2010		9890	2040	8370		9820	3160	2530		9440	2670	9490		7540	4310	1320		6980	3870	10050
9840	4020	1780		9880	2010	8200		9830	3150	2280		9320	3240	9880		7550	4480	1380		6980	4110	9980
9840	4120	1790		9880	2090	8580		9810	3160	2170		9300	3380	9880		7530	4520	1340		6960	4480	10010
9830	4180	1950		9900	2160	8810		9810	3240	2360		9100	4360	10180		7560	4510	1490		6940	4660	9960
9830	4230	1810		9870	2110	8440		9810	3240	2270		9050	4570	10340		7530	4520	1430		6900	4890	10040
9820	4230	1950		9880	2230	8900		9800	3260	2180		9670	1760	8000		7440	5090	1330		6900	4910	10110
9840	4240	1780		9910	2300	9030		9780	3270	1990		9520	2350	9170		7600	3900	1420		6910	4970	9880
9800	4270	2050		9860	2260	8740		9770	3330	2220		9420	2700	9570		7600	3930	1520		6880	5120	10030
9800	4280	2030		9860	2190	8230		9760	3370	2540		9370	2770	9880		7600	3960	1500		6880	5170	10000
9830	4340	1810		9880	2330	8870		9770	3450	2490		9350	2900	9930		7590	4150	1380		6870	5200	9980
10030	1300	3750		9840	2320	8340		9780	3430	1800		9340	3030	9960		7590	4140	1430		6980	3510	9940
9990	1510	3690		9900	2470	9120		9770	3500	1730		9350	3040	9680		7580	4260	1520		6960	3890	10170
10000	1510	3730		9830	2360	8350		9760	3520	1810		9320	3290	10310		7500	4550	1260		6950	4500	9970
9990	1510	3650		9950	2510	9510		9730	3570	2180		9280	3370	9930		7510	4560	1310		6930	4660	9910
9990	1540	3720		9810	2420	8440		9750	3670	1690		9280	3470	10050		7480	4700	1290		6910	4750	10110
9960	1580	3760		9940	2590	9520		9740	3750	1700		9270	3440	9940		7440	5070	1310		6910	4780	9970
9900	1910	3550		9860	3950	9410		9720	3800	1630		9260	3530	10080		7450	5430	1490		6880	4900	9970
[truncated: 204,794+ more rows]

## Sheet: Fig1C
ipsi fraction
VISp	SSp-bfd	MOp
0.686044	0.884377	0.697764
0.731769	0.794626	0.708589
0.84474	0.799978	0.739817
0.692147	0.664286	0.704736
0.721225	0.787532	0.729711
0.702066	0.846678	0.770722
contra fraction
0.313956	0.115623	0.302236
0.268231	0.205374	0.291411
0.15526	0.200022	0.260183
0.307853	0.335714	0.295264
0.278775	0.212468	0.270289
0.297934	0.153322	0.229278

## Sheet: Fig1D
No. projection areas ipsi
VISp	SSp-bfd	MOp
44	44	38
44	44	36
41	44	33
44	43	35
44	44	39
43	44	39
No. projection areas contra
39	34	32
39	43	29
35	44	29
40	43	30
39	44	33
38	44	31

## Sheet: Fig1E left
Area	VISp ipsi	VISp contra	SSp-bfd ipsi	SSp-bfd contra	MOp ipsi	MOp contra
FRP	24.5	56.1667	299.167	36.8333	2288.67	379.833
ACAd	2648.83	289.833	3849	708.333	1233.83	526.167
ACAv	1633.33	372.333	515.833	121.167	34	0
PL	487.667	65.5	1485.33	324.667	2033.33	321.833
ILA	172.5	33	106.667	22.6667	55	0
ORBl	786	80.8333	2792.33	524	1954	825.833
ORBm	550.5	64	589.833	98.8333	703	56
ORBvl	1806	171	1568.5	251.167	1761.83	548
AId	449.167	10.3333	1196.83	166.667	2835.83	814.833
AIv	107.667	0	186.333	34.5	80.3333	21.3333
Alp	138.5	51.3333	369.833	576.167	469	443.333
GU	85.6667	0	330.167	179.333	1248	207.5
VISC	111.833	95	2284	981.333	2144.67	481.167
TEa	10566.8	5116.67	4253	1629.5	779.333	132.833
PERI	944	211.333	321	257.167	166	103.833
ECT	2205.5	1113.17	2327.33	1561.17	908.167	691.167
SSs	903.667	526.167	24492.7	6293.5	14807.5	571.167
SSp-bfd	1572.67	699.167	0	0	3715.67	55.6667
SSp-tr	718.833	139.333	5068	1016	134.167	7.16667
SSp-ll	219.667	47	4570.33	1021	1952.33	174.333
SSp-ul	115.5	22.3333	10443	1160	20551.3	1752.5
SSp-un	55	14.3333	9678	756	4800.33	119.5
SSp-n	34.1667	0	5711.83	943.667	4320.5	73.3333
SSp-m	30.1667	0	532.333	54	3761.5	382
MOp	605.833	93.8333	12324.5	1660	0	0
MOs	1841.83	311.5	16842.7	2272.83	42398.2	12316.7
VISpl	3016.33	1646.17	755.333	183.667	44.8333	28.1667
VISpor	6062.33	3107.83	1641.17	486.667	93.8333	37.6667
VISli	3766.83	1076.17	515.167	102.833	0	0
VISl	10056.7	2146.83	1461	120.5	21.6667	17
VISp	0	0	4149.33	149.833	177	117.5
VISrl	2968.83	1162.83	4624.33	189.667	12.5	0
VISal	5339.83	1445.5	1983.83	174.833	0	0
VISa	3000.83	626.167	6416.5	487.333	52.6667	0
VISpm	4789.83	1188.83	1242.17	59.8333	0	0
VISam	2891.5	744.833	1610	163.833	0	0
RSPagl	5407.67	1361.67	1335.17	324.333	93.8333	27.5
RSPd	6468.33	1532.33	1380.5	204.833	202.5	65.6667
RSPv	3637.67	589.167	1563.33	69.1667	101.167	18.6667
AUDd	1657	957.667	1873.83	624.667	92	0
AUDp	4183	2291.17	627	514.667	18.1667	0
AUDpo	3217.83	1139.83	575.333	242.5	0	0
AUDv	3217.83	1908.67	1707.83	874	291.833	9.66667
ENTl	3416.83	575.667	2119	841.5	559.167	215.667
ENTm	2500.5	469.5	1569.67	502.667	249.5	153

## Sheet: Fig1E right
homotopic area fraction
VISp	SSp-bfd	MOp
0.153253	0.117342	0.569352
0.138563	0.183332	0.397356
0.326137	0.187355	0.522951
0.233011	0.235963	0.556793
0.169776	0.301596	0.473427
0.231136	0.189873	0.446047
other areas
VISp	SSp-bfd	MOp
0.846747	0.882658	0.430648
0.861437	0.816668	0.602644
0.673863	0.812645	0.477049
0.766989	0.764037	0.443207
0.830224	0.698404	0.526573
0.768864	0.810127	0.553953

## Sheet: Fig1F
Fractional count ipsi vs contra ,Correlation R2
VISp	SSp-bfd	MOp
0.744363	0.619543	0.770363
0.761037	0.849193	0.938957
0.812939	0.821861	0.852261
0.68803	0.18801	0.887099
0.673651	0.629145	0.767388
0.777678	0.737352	0.745742

## Sheet: Fig1G
ipsi VISp							contra VISp
mouse 1	mouse 2	mouse 3	mouse 4	mouse 5	mouse 6		mouse 1	mouse 2	mouse 3	mouse 4	mouse 5	mouse 6
0.000113792	0.000214021	0	0.000575358	0.000327369	0		0	0.000561602	0	0.00138734	0	0.0121553
0.0229404	0.0208885	0.0387876	0.0319138	0.0266478	0.0179167		0.00892717	0.0083853	0.0195343	0.00949376	0.00719928	0.00610131
0.0184115	0.0155013	0.0190454	0.0143747	0.0124213	0.0150772		0.0157792	0.0105349	0.0131271	0.00772558	0.0065289	0.0138107
0.00404339	0.0045984	0.00301939	0.00703422	0.00403132	0.0045679		0.00158575	0.00160734	0.00296921	0.00163216	0.0014282	0.00477699
0.00206342	0.00173663	0.000406457	0.00127136	0.00202033	0.00162037		0.00127251	0.000929548	0	0.000544055	0.00131161	0.00094594
0.00702473	0.00670804	0.00553556	0.00998524	0.00689346	0.00916667		0.00217306	0.00160734	0.00421941	0.00364517	0.00204028	0.00283782
0.00498407	0.00515486	0.00294197	0.0051411	0.0061826	0.0067284		0.00207518	0.00133623	0.00203157	0.00111531	0.00265237	0.00302701
0.0190866	0.0146574	0.0301359	0.0162678	0.0132351	0.0184877		0.00471809	0.00364073	0.011408	0.00522293	0.0037308	0.00964858
0.00663025	0.00339377	0.00257423	0.00357279	0.00489183	0.00347222		0.000587314	0	0	0.000326433	0.000291469	0.00047297
0.000713094	0.00105176	0.000793559	0.00128064	0.00111305	0.00126543		0	0	0	0	0	0
0.0013124	0.00116795	0.00114195	0.000983677	0.00100081	0.00300926		0.00148786	0.00139432	0.00453196	0.0010065	0.00215687	0.00094594
0.00106205	0.000746018	0.000212906	0.000918717	0.000925987	0.00066358		0	0	0	0	0	0
0.000766196	0.00108845	0.00121937	0.00154975	0.00100081	0.000848765		0.00283868	0.00315659	0.00390686	0.00255706	0.00335189	0.00132432
0.127234	0.122647	0.0671234	0.0679201	0.0964055	0.084537		0.146437	0.14927	0.0679794	0.139224	0.201376	0.144256
0.00835988	0.0165469	0.00197422	0.00563294	0.00913827	0.00262346		0.0061668	0.00933421	0.00812627	0.0049509	0.00594596	0.0015608
0.0270217	0.0283609	0.017497	0.0136508	0.0138711	0.0181327		0.0310885	0.0366978	0.0453196	0.0227415	0.0401935	0.0326822
0.00914125	0.00616382	0.00810978	0.0146252	0.0077072	0.00601852		0.0252937	0.0155312	0.00859509	0.0151791	0.00734501	0.0093648
0.020839	0.0113309	0.00994852	0.0178918	0.0131228	0.0152932		0.0267032	0.0175259	0.0160963	0.0298686	0.0134367	0.0124864
0.00950539	0.00505091	0.00243874	0.00928925	0.00680927	0.00584877		0.00389585	0.00515125	0.00171902	0.00505971	0.00405142	0.00165539
0.00228342	0.00152261	0.0011226	0.00296031	0.00271249	0.00155864		0.000998434	0.00226577	0.00156274	0.00155056	0.00107843	0.00047297
0.0013655	0.000617605	0.000619363	0.00119712	0.00153396	0.00134259		0.00095928	0.00083272	0	0.000734474	0.000437203	0
0.000546199	0.000342434	0.000251616	0.000621758	0.000757625	0.000632716		0.000469851	0.000445408	0	0.000544055	0.000553791	0
0.000439994	0.000238481	0	0.000371199	0.000383489	0.000416667		0	0	0	0	0	0
0.000280686	0.000238481	0	0.000287679	0.000448963	0.000401235		0	0	0	0	0	0
0.00593992	0.00506314	0.00342585	0.00841693	0.0062013	0.00427469		0.00236883	0.0029242	0.00468823	0.00334594	0.00294383	0.00174999
0.0163708	0.0132693	0.0157357	0.0287493	0.0173225	0.0148148		0.00542287	0.00985708	0.0187529	0.0104459	0.00845259	0.0136688
0.0397663	0.0244657	0.0412844	0.015182	0.0208487	0.0440895		0.0481402	0.0644293	0.05579	0.0194772	0.0462269	0.0677293
0.0583751	0.0759226	0.0777107	0.0312642	0.0470382	0.0594136		0.081989	0.121519	0.139397	0.0645793	0.0922207	0.0829589
0.0344788	0.0380408	0.0281036	0.0302434	0.0438862	0.0375309		0.0229052	0.0292033	0.0268792	0.052066	0.0283891	0.0340065
0.0856395	0.0961507	0.177254	0.0777847	0.0984819	0.081142		0.0386648	0.0565281	0.160806	0.0766573	0.0759276	0.0726009
NaN	NaN	NaN	NaN	NaN	NaN		NaN	NaN	NaN	NaN	NaN	NaN
0.0152177	0.017831	0.0416522	0.0577864	0.0360386	0.0101698		0.0317345	0.0229095	0.0748554	0.0681701	0.0233758	0.0182566
0.0435746	0.0374904	0.0762784	0.0726993	0.0591228	0.0319136		0.0364918	0.0356133	0.0484451	0.0762765	0.0351511	0.030743
0.0412456	0.0211942	0.0101808	0.0342988	0.0205775	0.041358		0.0219851	0.0220574	0.012502	0.0214358	0.0122125	0.00983777
0.0414884	0.0419849	0.0574653	0.0376024	0.0492363	0.0635648		0.0429718	0.0331732	0.0334427	0.0282909	0.028185	0.0474862
0.0261417	0.0220931	0.0188131	0.0430683	0.0223079	0.0353704		0.0286413	0.0226384	0.0237537	0.0196132	0.0141945	0.0225607
0.0434077	0.0484178	0.0369876	0.053267	0.0527719	0.0850772		0.0457909	0.034645	0.0257853	0.0277468	0.034131	0.0797427
0.0529889	0.0595652	0.0493748	0.0535733	0.0633599	0.107809		0.0461433	0.0407452	0.0359431	0.0287805	0.0462561	0.0878778
0.0315278	0.0365977	0.0356521	0.033445	0.0308849	0.0453241		0.0162686	0.0154925	0.0198469	0.0134926	0.0157102	0.0350944
0.0179715	0.0151221	0.0114969	0.0194323	0.0163497	0.0102469		0.0463587	0.0227739	0.0118769	0.0306303	0.0197324	0.0152769
0.0376498	0.0404867	0.0151357	0.0534062	0.0532115	0.0198765		0.082224	0.0649715	0.0128145	0.0812546	0.0665423	0.0397295
0.0294113	0.0354053	0.0179615	0.0349484	0.0353933	0.0179321		0.0323806	0.0326891	0.0175027	0.041457	0.0391151	0.0245471
0.0339554	0.0319932	0.0130066	0.0318952	0.0418378	0.0156944		0.0649569	0.057419	0.00875137	0.0518212	0.0689324	0.0398714
0.0254741	0.0496774	0.0245423	0.0330274	0.0261428	0.0215586		0.014076	0.019443	0.0367245	0.0205381	0.0167012	0.00794589
0.0232059	0.0192619	0.0330391	0.0205922	0.0254038	0.0332099		0.00702819	0.0207599	0.0203157	0.00941215	0.0204903	0.00979047
ipsi SSp-bfd							contra SSp-bfd
mouse 1	mouse 2	mouse 3	mouse 4	mouse 5	mouse 6		mouse 1	mouse 2	mouse 3	mouse 4	mouse 5	mouse 6
0.00487336	0.00101573	0.0009581	0.00133753	0.00189631	0.00271247		0.00719629	0	0.000547736	0.00234327	0.00103715	0.000755858
0.00621736	0.0217946	0.0269139	0.0435353	0.0502378	0.014765		0.0141085	0.0180381	0.0237194	0.0391564	0.026428	0.0202919
0.000196683	0.00286558	0.00471308	0.00415683	0.00538494	0.00262717		0	0.00315508	0.00650139	0.00424506	0.00207429	0.00511658
0.00588955	0.0106215	0.0116085	0.012418	0.0132307	0.00690911		0.00965818	0.00595959	0.0139316	0.0161652	0.00756732	0.0116577
0.000174829	0.00092156	0.000972617	0.00128508	0.000709307	0.00038384		0	0.000414303	0.00109547	0.00176594	0.000384128	0.000436072
0.0265849	0.0172204	0.01667	0.0131393	0.019325	0.0198061		0.0379699	0.0126522	0.00969255	0.026659	0.0216264	0.0171812
0.00177014	0.00681416	0.00456791	0.0056386	0.00439336	0.00163345		0.00227251	0.0027089	0.00400086	0.0071317	0.00218953	0.0014245
0.0072117	0.0129489	0.011865	0.0145424	0.0111028	0.00738251		0.00927942	0.00828606	0.00642995	0.014569	0.00791303	0.00709344
0.0146091	0.00661909	0.00726801	0.00141621	0.00818598	0.00903729		0.0172332	0.00452546	0.004882	0.00451674	0.00476319	0.00622129
0.00114732	0.00116372	0.00111294	0.000472069	0.0012811	0.00169316		0.00227251	0.000924214	0.000904956	0.0012905	0.00115238	0.00139543
0.00370419	0.00169513	0.00233234	0	0.00260562	0.0033522		0.0572862	0.00726624	0.0106451	0.0402432	0.0189759	0.0144776
0.00292839	0.00208528	0.00203717	0.0006032	0.00248257	0.00252908		0.0121201	0.00286825	0.00826368	0.00329417	0.00349556	0.00939008
0.0256234	0.016171	0.0166216	0.00073433	0.00937299	0.0177803		0.0609791	0.0243164	0.0302922	0.0427223	0.0235086	0.0389267
0.0230337	0.035396	0.0300495	0.0118542	0.0379696	0.0246851		0.0345611	0.056632	0.054988	0.0581743	0.0730227	0.0497703
0.00232741	0.00172877	0.00286462	0.0019145	0.00176603	0.00202155		0.00880598	0.010007	0.00531066	0.0074713	0.0168632	0.00738415
0.0151336	0.016319	0.0161232	0.0151587	0.0185867	0.0132083		0.0987596	0.0397412	0.0399371	0.061842	0.0701417	0.0509623
0.190564	0.201283	0.166806	0.0715841	0.159435	0.160505		0.112489	0.22264	0.169917	0.255926	0.272385	0.227484
NaN	NaN	NaN	NaN	NaN	NaN		NaN	NaN	NaN	NaN	NaN	NaN
0.00479687	0.0455062	0.0389482	0.0374246	0.0334822	0.032733		0.00833254	0.0525846	0.0519635	0.0167086	0.0285023	0.0273853
0.00735374	0.0414702	0.0373272	0.0193155	0.0259114	0.0333386		0.0175173	0.0362356	0.0651092	0.0104259	0.0122921	0.0419501
0.0518914	0.056047	0.0674299	0.0761081	0.0555214	0.0945397		0.0540668	0.0384664	0.0576552	0.0175236	0.0188991	0.0509623
0.071658	0.0459636	0.0532133	0.0876475	0.0473861	0.0872126		0.0302055	0.0193129	0.0328642	0.0184405	0.0121769	0.039857
0.216023	0.00724467	0.0102246	0.0698662	0.00641995	0.0217338		0.0733832	0.0145325	0.0381748	0.0722	0.00829716	0.0141287
0.0127734	0.00219291	0.00256461	0.0022161	0.00119424	0.00356118		0.00795379	0.0015616	0.000571551	0.00326021	0.000499366	0.00168614
0.106536	0.0575336	0.0733769	0.0837136	0.0514031	0.115126		0.12281	0.0507999	0.0607987	0.0246553	0.0363001	0.0827083
0.15338	0.0823283	0.0883	0.184146	0.142411	0.0972948		0.163337	0.0550386	0.0682527	0.0748149	0.0991818	0.0736671
0.000393365	0.00546882	0.00856483	0.00757933	0.00138966	0.00487476		0	0.0067882	0.00659665	0.011173	0.00230477	0.00648294
0.00135492	0.0102515	0.0134666	0.0195384	0.00846826	0.011754		0.00482909	0.0166359	0.0176466	0.0201725	0.0160565	0.0172684
0.000218536	0.0049105	0.0047034	0.00280619	0.00338007	0.00293424		0	0.0037606	0.00428663	0.00213951	0.0048016	0.00380836
0.000502633	0.00985464	0.013094	0.00659586	0.0105238	0.0110546		0	0.00379247	0.00531066	0.00387149	0.00445588	0.00438979
0.00111453	0.0271288	0.0291253	0.0390375	0.0389757	0.02721		0.00132563	0.00503538	0.00452478	0.0103919	0.00368763	0.00392465
0.00336546	0.0316963	0.0322464	0.0270522	0.06826	0.019482		0	0.00889158	0.0039056	0.0012905	0.0190527	0.0046805
0.000797657	0.0155253	0.0120585	0.0134671	0.0228209	0.0121549		0	0.00675633	0.00616799	0.00244515	0.0121769	0.00549451
0.00339824	0.0512441	0.0447404	0.0554288	0.055876	0.0399918		0.00293533	0.0269297	0.0251721	0.0056714	0.0141743	0.0132275
0.000327804	0.00923578	0.0132973	0.00920535	0.00586264	0.00763414		0	0.00391994	0.00257198	0.000577328	0.000806668	0.00261643
0.000644682	0.0145835	0.0167474	0.00503541	0.0108423	0.00891361		0.00132563	0.0103576	0.00731109	0.00183387	0.0039181	0.00526193
0.00099434	0.0109175	0.018291	0.00186205	0.00408937	0.00771944		0.0031247	0.0154886	0.0252673	0.00298852	0.00411017	0.00497122
0.00128936	0.0139378	0.0165635	0.000550747	0.00521847	0.00813313		0.00198845	0.0112818	0.0136696	0.00183387	0.00349556	0.00392465
0.00101619	0.016245	0.0156732	0.00154734	0.00703517	0.0108456		0	0.00331442	0.00369127	0	0.00307302	0.00220943
0.00416312	0.0229381	0.0199895	0.00125885	0.0082077	0.00891787		0.00151501	0.0307859	0.019528	0.0153501	0.0342642	0.017501
0.00140956	0.00703614	0.00517277	0.00171781	0.00331493	0.00396208		0.00094688	0.0301166	0.0175514	0.0179311	0.0179388	0.0116577
0.000469853	0.00660563	0.00401628	0.00490427	0.00265628	0.00365074		0	0.00981579	0.00952585	0.0104938	0.00906542	0.00587243
0.00812955	0.0174693	0.0135489	0.000826121	0.0142296	0.00885816		0.00454502	0.049079	0.0269582	0.0221083	0.041409	0.0231118
0.00870867	0.013292	0.0142167	0.0217021	0.0134189	0.0149015		0.0135404	0.0279495	0.0215999	0.0347416	0.0311144	0.0374731
0.0052995	0.0167092	0.00961487	0.0196564	0.00373472	0.0104362		0.00132563	0.0406336	0.0122645	0.00944101	0.00441747	0.0238095
ipsi MOp							contra MOp
mouse 1	mouse 2	mouse 3	mouse 4	mouse 5	mouse 6		mouse 1	mouse 2	mouse 3	mouse 4	mouse 5	mouse 6
0.0185534	0.0172947	0.0116008	0.0171833	0.0229915	0.0255561		0.0199492	0.0127695	0.00832684	0.0104114	0.020199	0.0257431
0.00839085	0.0163638	0.00377436	0.00982871	0.00931563	0.017905		0.0141233	0.0490498	0.00574601	0.0597743	0.0319735	0.0083323
0.000158069	0.000372329	8.1696e-05	0	0.000245829	0.000765111		0	0	0	0	0	0
0.00845013	0.0107044	0.00263878	0.00935552	0.00947735	0.0537081		0.00875644	0.0172763	0.00219127	0.0288315	0.013466	0.0251213
0.000158069	0.000297863	0	0	0.000329928	0.00163269		0	0	0	0	0	0
0.0199892	0.0311267	0.00952575	0.00966647	0.0228815	0.0109233		0.029553	0.059641	0.0175789	0.0355297	0.0494859	0.0407495
0.00106697	0.00161963	0.000334954	0.000405586	0.00168199	0.0248524		0.000635548	0.00398107	0	0.00152894	0.00106136	0.00878829
0.00443253	0.0066833	0.0015849	0.00156827	0.00651447	0.0561673		0.00335428	0.00608428	0.00077912	0.00669822	0.00331675	0.120383
0.0271484	0.0367674	0.0269679	0.024227	0.0311815	0.0068655		0.0620013	0.0350034	0.047088	0.0159447	0.0326036	0.0206442
0.000836451	0.00100529	0.000424819	0.000730055	0.00106742	0.00020494		0.00120048	0.00150229	0.00077912	0	0.00192371	0
0.00397808	0.00318341	0.0054818	0.00258223	0.00515594	0.00259591		0.0219264	0.0100653	0.0300935	0.015435	0.0156219	0.0250383
0.0114008	0.00780028	0.0123769	0.00953128	0.0127702	0.00781506		0.0110868	0.0036055	0.011979	0.00364033	0.00888889	0.0132239
0.0157411	0.0143905	0.0271149	0.0130734	0.0212383	0.0145918		0.019702	0.0136708	0.0228379	0.014707	0.0176451	0.0391328
0.00651378	0.00552908	0.00511417	0.0076115	0.00789887	0.00669472		0.00416637	0.00548336	0.00447994	0.00276665	0.00898839	0.00849811
0.00109331	0.00156378	0.00105388	0.0022848	0.00170786	0.00125697		0.00593178	0.00488245	0.00647643	0.00269385	0.00547264	0.00227998
0.00711313	0.00796783	0.00710755	0.00930145	0.00998195	0.00573833		0.0310359	0.0274168	0.0266362	0.0232981	0.0440796	0.0293081
0.133101	0.0677266	0.148858	0.123325	0.134326	0.115388		0.0485488	0.00691054	0.0284379	0.0265744	0.0158872	0.0220536
0.0248432	0.0522749	0.0114374	0.0200224	0.032954	0.0528678		0.00141233	0.00210321	0.00102259	0.00247543	0.00175788	0.00654977
0.000638864	0.000744657	8.1696e-05	0.00121676	0.00234184	0.00140726		0.000353082	0	0	0	0.00066335	0.000538905
0.021234	0.00761412	0.00348025	0.018711	0.0240265	0.0174678		0.00653202	0.00150229	0.00379821	0.0151438	0.0156882	0.00339925
0.220981	0.0907365	0.148368	0.217164	0.177909	0.158194		0.0896829	0.0284684	0.100847	0.133382	0.0708789	0.0645028
0.0347819	0.0538759	0.0471794	0.0308651	0.0433759	0.040059		0.00197726	0.00217832	0.00394429	0.0187113	0.00656716	0.0039796
0.037087	0.0392248	0.0530452	0.0154528	0.0326112	0.0376271		0.005155	0.00120183	0.00316517	0.0042956	0.0012272	0.00485014
0.0365799	0.0166803	0.0613374	0.0110995	0.0281992	0.0234384		0.0219617	0.0077368	0.017238	0.0250455	0.0206302	0.0102392
NaN	NaN	NaN	NaN	NaN	NaN		NaN	NaN	NaN	NaN	NaN	NaN
0.344446	0.494099	0.404501	0.410007	0.340745	0.294008		0.575913	0.681214	0.638732	0.482854	0.576982	0.471542
0.000118552	0	0	0.000986927	0.000284644	0.000915401		0.000847398	0.00277924	0	0.00167455	0.00119403	0.00203126
0.000368829	0.000446794	0.000228749	0.00273095	0.000588696	0.00110668		0.00105925	0	0.000535645	0.00313069	0.00212272	0.00323343
0	0	0	0	0	0		0	0	0	0	0	0
0	0	0	0.00127084	0.000103507	0.000136627		0.000494315	0	0.00087651	0.00145613	0.00092869	0.000911993
0.000223932	0.00026063	8.1696e-05	0.00438033	0.00133265	0.00323806		0.000847398	0.00202809	0.00121737	0.0138333	0.0040796	0.0130995
8.56209e-05	0.000446794	0	0	8.40994e-05	0.000170784		0	0	0	0	0	0
0	0	0	0	0	0		0	0	0	0	0	0
0.000138311	0.00026063	0	0.000392067	0.000782771	0.000894907		0	0	0	0	0	0
0	0	0	0	0	0		0	0	0	0	0	0
0	0	0	0	0	0		0	0	0	0	0	0
9.22072e-05	0.000800506	0	0.00132492	0.00158495	0.00111351		0	0	0.00068173	0.00174736	0.0026534	0.00194835
0.000434691	0.00188026	0.000343123	0.00420458	0.00297582	0.00160537		0.000494315	0.00135206	0.00321387	0.0104114	0.00421227	0.00107781
0.000263449	0.00161963	0.000114374	0.00106804	0.0015526	0.00100421		0.000388391	0.00172763	0.000535645	0.00400437	0.00039801	0
0.000783761	0.000428178	0.000187901	0.000365028	0.00116445	0.00122964		0	0	0	0	0	0
0.000158069	0	0.000106205	0	0.000200545	0.000280085		0	0	0	0	0	0
0	0	0	0	0	0		0	0	0	0	0	0
0.00300991	0.00119145	0.00121727	0.00187922	0.00201839	0.00430375		0.000423699	0.00082626	0	0	0.00066335	0.000621813
0.00428105	0.00547323	0.00355378	0.00858491	0.00498127	0.0039007		0.00808559	0.00570871	0.00988508	0.0193666	0.0106136	0.00829084
0.00132383	0.00154516	0.000694416	0.00759798	0.00141675	0.00237048		0.00240096	0.00383084	0.00087651	0.0146341	0.00812604	0.0138872
