# Supplementary material for: Layer 6 corticocortical neurons are a major route for intra- and interhemispheric feedback
Source: eLife. 2025 Mar 28;13:RP100478. doi: 10.7554/eLife.100478 (PMC11952746; doi:10.7554/eLife.100478)
Supplement: Figure 2—source data 1. [file elife-100478-fig2-data1.xlsx]

## Sheet: Fig2B
VISp fraction ipsi							VISp fraction contra
module 1	module 2	module 3	module 4	module 5	module 6		module 1	module 2	module 3	module 4	module 5	module 6
0.385928	0.22178	0.127924	0.118988	0.0786679	0.0667122		0.353524	0.20971	0.108203	0.22592	0.0365309	0.066112
0.375174	0.243942	0.144581	0.123007	0.0694591	0.0438377		0.408072	0.240056	0.0908827	0.177854	0.028603	0.0545335
0.528742	0.150118	0.122014	0.0576007	0.0998723	0.0416522		0.575871	0.186904	0.0815752	0.0509455	0.0532896	0.0514143
0.399929	0.149129	0.140285	0.139682	0.0865635	0.0844106		0.426566	0.200756	0.0700199	0.205163	0.0307663	0.0667283
0.397538	0.179894	0.147017	0.146792	0.0717593	0.0569996		0.355883	0.290507	0.0960972	0.194322	0.0248914	0.038299
0.404552	0.169321	0.23821	0.06375	0.0735648	0.0506019		0.38618	0.198978	0.202715	0.119425	0.0533037	0.0393984
SSp-bfd fraction ipsi							MOp fraction contra
module 1	module 2	module 3	module 4	module 5	module 6		module 1	module 2	module 3	module 4	module 5	module 6
0.814976	0.0121178	0.102515	0.0529186	0.0141721	0.0032999		0.590096	0.0104157	0.306884	0.0804848	0.00700691	0.00511315
0.53957	0.179899	0.111179	0.0742024	0.0540491	0.0411002		0.491172	0.0928676	0.214864	0.0512142	0.119797	0.0300848
0.538191	0.188044	0.102241	0.078269	0.0427274	0.0505277		0.545307	0.0834941	0.189088	0.0659189	0.0735634	0.0426282
0.632022	0.185746	0.0735117	0.096053	0.00870705	0.00396014		0.493955	0.0595667	0.263737	0.112036	0.0658833	0.00482239
0.523165	0.226399	0.0994043	0.10628	0.0284085	0.016343		0.488534	0.0814351	0.247455	0.0692198	0.102677	0.0106788
0.646045	0.146004	0.0996447	0.0562197	0.0253889	0.0266982		0.559829	0.0671551	0.23981	0.0639572	0.0581429	0.0111053
MOp fraction ipsi							MOp fraction contra
module 1	module 2	module 3	module 4	module 5	module 6		module 1	module 2	module 3	module 4	module 5	module 6
0.853694	0.0794299	0.0611992	0.000790347	0.000935244	0.00395174		0.751536	0.167538	0.0763717	0.000882706	0.00324836	0.000423699
0.822976	0.085226	0.0844627	0.00430039	0.00141485	0.00161963		0.731315	0.11117	0.148802	0.0030797	0.00480733	0.00082626
0.878289	0.0898901	0.0295413	0.000457498	0.000310445	0.00151138		0.797185	0.161132	0.0346221	0.00443124	0.00262953	0
0.847865	0.0855246	0.0480079	0.00659754	0.00976111	0.00224424		0.708482	0.112486	0.142774	0.0161631	0.0200946	0
0.816489	0.0974	0.0734382	0.00611338	0.00317637	0.00338338		0.710282	0.153964	0.119502	0.00726368	0.00832504	0.00066335
0.740457	0.0520344	0.19151	0.00372308	0.00646245	0.00581348		0.587655	0.160303	0.229117	0.00302616	0.0192762	0.000621813

## Sheet: Fig2C
Fraction sorted
VISp ipsi	VISp contra		SSp-bfd ipsi	SSp-bfd contra		MOp ipsi	MOp contra
0.102742	0.141424		0.158363	0.21014		0.381301	0.571206
0.0943111	0.0971106		0.124643	0.0890486		0.168892	0.0812937
0.0644451	0.0801975		0.0812816	0.0630121		0.120454	0.0387563
0.0582874	0.0579227		0.0669229	0.0602307		0.0416895	0.0355475
0.0535132	0.0502988		0.0655135	0.0545247		0.0358414	0.0302958
0.0533215	0.0486254		0.0552521	0.0395956		0.0324	0.0281665
0.048557	0.0476243		0.0417799	0.0367909		0.0295558	0.0247354
0.0366277	0.0437868		0.0321485	0.0367861		0.0255263	0.0234359
0.0355719	0.041307		0.0303504	0.0309128		0.0188633	0.0212826
0.0353806	0.0398837		0.0274528	0.0305884		0.0176917	0.0196968
0.0309395	0.0355916		0.027244	0.0278685		0.0173522	0.0171419
0.0300704	0.0347872		0.0271647	0.0277365		0.0157224	0.0162331
0.0297826	0.0322416		0.0270986	0.0254762		0.0154223	0.0159405
0.0285086	0.0312819		0.0187909	0.0248157		0.0128251	0.0103251
0.0281425	0.0244415		0.0157549	0.0236237		0.0109297	0.00873739
0.0280638	0.0219003		0.0143839	0.0209635		0.0102824	0.0076773
0.0279658	0.0193528		0.0143733	0.019824		0.00786837	0.00729261
0.0265158	0.0193175		0.012804	0.0160237		0.00656035	0.00622633
0.0257855	0.0192381		0.0109125	0.0154348		0.00512916	0.00585088
0.0197557	0.0166718		0.0109085	0.0153153		0.00499359	0.00573047
0.0186451	0.0146328		0.0108422	0.0146851		0.00382956	0.00462285
0.0177104	0.0135515		0.0108056	0.0108232		0.00249144	0.00346028
0.0158052	0.011251		0.0105103	0.00932508		0.00227	0.00331582
0.0151032	0.0111		0.0101129	0.00930705		0.00190731	0.00266587
0.0147377	0.00994019		0.00946115	0.00892849		0.00158622	0.00255353
0.00862763	0.00639486		0.00872708	0.00746221		0.00149343	0.00168029
0.00755228	0.00601416		0.00860426	0.00702365		0.00107185	0.00142108
0.00737928	0.00358877		0.00785595	0.00657197		0.000937051	0.00117567
0.00649039	0.0030035		0.0076155	0.00630349		0.000911782	0.00117181
0.00555364	0.0028559		0.00759383	0.00603232		0.000819348	0.000900934
0.00518883	0.00275385		0.00731228	0.00555759		0.000711495	0.00077794
0.0045491	0.00235071		0.0047118	0.0055068		0.000693161	0.00042252
0.00408918	0.00233328		0.00413627	0.00500137		0.000411448	0.000259223
0.00202668	0.00203961		0.00408375	0.00481499		0.000403092	0
0.00151976	0.00192058		0.00376888	0.00363672		0.000384254	0
0.00143601	0.00132149		0.00371718	0.0035154		0.000270506	0
0.00111269	0.000833944		0.00332405	0.003288		0.000251828	0
0.00107889	0.000493946		0.00315882	0.00313278		0.000131216	0
0.00103626	0.000335518		0.00228158	0.00258878		0.000124151	0
0.000754877	0.000279698		0.00213225	0.00204802		0	0
0.000525392	0		0.00211095	0.00198005		0	0
0.000308305	0		0.00210381	0.00174873		0	0
0.000276174	0		0.00114505	0.00132333		0	0
0.00020509	0		0.000741205	0.000682653		0	0
