# Supplementary material for: Layer 6 corticocortical neurons are a major route for intra- and interhemispheric feedback
Source: eLife. 2025 Mar 28;13:RP100478. doi: 10.7554/eLife.100478 (PMC11952746; doi:10.7554/eLife.100478)
Supplement: Figure 3—source data 1. [file elife-100478-fig3-data1.xlsx]

## Sheet: Fig3B
VISp ipsi						VISp contra
L2/3	L4	L5	L6a	L6b		L2/3	L4	L5	L6a	L6b
0.266904	0.0700046	0.307257	0.318191	0.0376446		0.194118	0.0702403	0.272049	0.41997	0.0436222
0.289128	0.0730216	0.28853	0.304614	0.0447069		0.173167	0.053535	0.304096	0.431264	0.0379382
0.265431	0.0528812	0.339015	0.29749	0.0451832		0.130346	0.0384944	0.253956	0.524808	0.0523952
0.289791	0.0679489	0.27594	0.314124	0.0521964		0.282918	0.0911628	0.2137	0.369471	0.0427484
0.304212	0.0826467	0.278727	0.291388	0.0430268		0.256764	0.0716596	0.343618	0.30671	0.0212479
0.21998	0.0521279	0.301889	0.379091	0.0469119		0.120839	0.0366673	0.265955	0.525073	0.0514663
SSp-bfd ipsi						SSp-bfd contra
L2/3	L4	L5	L6a	L6b		L2/3	L4	L5	L6a	L6b
0.286169	0.0565862	0.17575	0.442711	0.0387842		0.139958	0.00825263	0.249432	0.585432	0.0169263
0.290215	0.0712975	0.265514	0.343425	0.0295474		0.217669	0.0572702	0.303442	0.400228	0.0213901
0.282846	0.0707054	0.283972	0.326918	0.0355591		0.31635	0.0411615	0.272444	0.344667	0.025378
0.428837	0.102182	0.383704	0.0808701	0.00440697		0.281629	0.0803436	0.326309	0.308144	0.00357438
0.310358	0.084464	0.29494	0.294684	0.015554		0.272904	0.0727258	0.29702	0.335983	0.0213678
0.314045	0.0858592	0.271983	0.303619	0.0244943		0.261088	0.0358813	0.276656	0.402786	0.0235886
MOp ipsi						MOp contra
L2/3	L4	L5	L6a	L6b		L2/3	L4	L5	L6a	L6b
0.331923	0.0557144	0.264873	0.326538	0.0209513		0.263245	0.00503425	0.342161	0.386432	0.00312734
0.268554	0.0163502	0.261942	0.435711	0.0174427		0.187709	0.000457268	0.253327	0.5527	0.00580731
0.386017	0.0490981	0.25012	0.302362	0.0124034		0.245496	0.00514127	0.331378	0.413919	0.00406628
0.339065	0.0419437	0.255884	0.344529	0.0185789		0.270004	0.00547373	0.311737	0.409435	0.00335058
0.316997	0.0502153	0.277042	0.335199	0.020547		0.257157	0.00419805	0.354435	0.379006	0.00520346
0.301836	0.0411795	0.246628	0.391864	0.0184927		0.28713	0.00193959	0.227263	0.474986	0.00868084

## Sheet: Fig3C
	sorted fraction L2/3, L5 and L6a
	VISp ipsi
L2/3	0.313602	0.36096	0.373052	0.393745	0.427361	0.428576	0.45559	0.456063	0.458575	0.504158	1	1	0.306113	0.161031	0.218759	0.237714	0.155934	0.292677	0.145914	0.218624	0.105058	0.140952	0.188893	0.0486797	0.054352	0.0178768	1	1	0.30796	0.254699	0.0908865	0.265749	0.304384	0.0248862	0.153585	0.247657	0.0758002	0	0.101702	0	0.0280303	0.212159	0.0511918	0.0848651	0.030213	0.0016835	0.000923895
L4	NaN	0.0766911	0.14363	0.0336101	0.130391	0.111183	NaN	0.0222993	0.0690767	NaN	1	1	0.102117	0.107968	0.156609	0.0833866	0.0416316	0.0541165	NaN	NaN	NaN	NaN	NaN	NaN	NaN	NaN	1	1	0.019924	0.00980648	NaN	0.0102369	0.0568887	NaN	NaN	0.0155726	NaN	0	0.00292726	0	0.0158934	NaN	NaN	0	NaN	0.00473312	NaN
L5	0.288112	0.228161	0.212059	0.22396	0.131697	0.142933	0.380108	0.139832	0.239181	0.362272	1	1	0.331521	0.352619	0.355585	0.368233	0.417156	0.423745	0.438877	0.450324	0.470677	0.482907	0.486372	0.499348	0.522677	0.616467	1	1	0.179218	0.0855251	0.135782	0.0845231	0.0851159	0.434245	0.291235	0.0424788	0.384262	0	0.0142299	0	0.156871	0.103243	0.184148	0.00696382	0.124077	0.0903863	0.0474525
L6a	0.300207	0.28038	0.247312	0.291987	0.281827	0.277498	0.152246	0.312477	0.203422	0.130491	1	1	0.229331	0.30681	0.244396	0.273044	0.373919	0.221709	0.406997	0.311251	0.422673	0.370486	0.302192	0.451679	0.404748	0.361059	1	1	0.402831	0.414938	0.422885	0.466007	0.479293	0.489324	0.503836	0.534962	0.536945	0.540827	0.557687	0.568526	0.600509	0.601355	0.610572	0.624921	0.69619	0.800245	0.836765
L6b	0.0980785	0.053807	0.0239476	0.0566981	0.0287241	0.0398111	0.0120555	0.0693286	0.0297451	0.00307926	1	1	0.0309182	0.0715717	0.0246513	0.0376224	0.011359	0.00775337	0.00821193	0.0198013	0.00159141	0.00565497	0.0225427	0.000293083	0.0182226	0.00459749	1	1	0.0900673	0.235031	0.0171131	0.173484	0.0743194	0.0515449	0.0513448	0.15933	0.00299245	0.292507	0.323454	0.264808	0.198696	0.0832432	0.154087	0.28325	0.14952	0.102952	0.114859
	SSp-bfd ipsi
L2/3	0.362312	0.383145	0.404145	0.404365	0.421835	0.445732	0.450015	0.484872	0.488595	0.4972	0.565812	0.622121	0.652597	1	1	0.159009	0.29505	0.10988	0.136444	0.125122	0.180928	0.0767557	0.0849407	0.148815	0.0279444	0.180496	0.068966	0.122058	0.030537	0.0468678	0.259655	0.0809327	0.161833	0.22793	0.0307476	0.0513909	0.164228	1	1	0.320955	0.101877	0.0545424	0.0723826	0.286327	0.0958242	0.00830926	0.00171041
L4	0.130292	0.168656	0.0819648	0.163856	0.133901	0.0791109	0.146804	0.0438154	0.0646341	0.17583	0.13496	0.18641	0.135095	1	1	0.0653767	0.208806	NaN	NaN	0.0195288	NaN	0.0792085	NaN	NaN	NaN	0.12913	NaN	NaN	NaN	NaN	0.0390876	NaN	0.0676764	0.0146744	NaN	NaN	NaN	1	1	NaN	NaN	NaN	0.0938684	0.0110476	NaN	0.00599618	NaN
L5	0.287822	0.274017	0.231991	0.163004	0.220991	0.10588	0.102567	0.030327	0.0734869	0.164349	0.191384	0.0725576	0.063532	1	1	0.395722	0.402589	0.433239	0.440227	0.446306	0.456076	0.473209	0.484313	0.489356	0.513431	0.515334	0.545065	0.557531	0.560588	0.562368	0.570648	0.586518	0.587303	0.596895	0.597303	0.605342	0.638748	1	1	0.300283	0.217797	0.442168	0.302858	0.00453552	0.108997	0.11875	0.129748
L6a	0.213571	0.155313	0.239359	0.241135	0.199843	0.336373	0.278465	0.404029	0.351238	0.145413	0.105426	0.101951	0.127869	1	1	0.335145	0.0868867	0.409694	0.420434	0.360819	0.347274	0.349638	0.428487	0.360217	0.458371	0.164481	0.202228	0.302388	0.408164	0.381696	0.129729	0.32735	0.174231	0.160358	0.328398	0.337707	0.192478	1	1	0.362682	0.459768	0.498513	0.505873	0.535152	0.666581	0.755275	0.796687
L6b	0.00600379	0.0188701	0.0425401	0.0276396	0.0234304	0.032904	0.0221492	0.0369563	0.0220454	0.0172069	0.00241766	0.0169609	0.020906	1	1	0.0447473	0.00666853	0.0471876	0.00289491	0.0482235	0.0157216	0.0211893	0.00225923	0.00161141	0.000253922	0.0105584	0.0170743	0.0180226	0.000710773	0.00906848	0.000880282	0.00519931	0.00895644	0.00014245	0.0435514	0.0055603	0.00454641	1	1	0.0160804	0.220557	0.00477648	0.0250179	0.162938	0.128598	0.11167	0.0718542
	MOp ipsi
L2/3	0.333984	0.458717	0.465649	0.481717	0.492215	0.547011	1	1	0.0271645	0	0.299222	0.0123839	0.179181	0.070448	0.204556	0.116885	1	1	0.0444444	0.0670338	0.267678	0.240278	0.336632	0.334995	0.179701	0.42934	0.0646948	0.126946	0.038521	0.0653265	0.0503037	0.120552	0.0847111	0.109309	0.0338312	0.0777772	0.266423	0.0874578	0.0211857	0.0031325	0.046431	0.00411267
L4	0.0273133	0.102155	0.0506956	0.0938937	0.0412969	0.105069	1	1	NaN	0	NaN	0	NaN	NaN	NaN	NaN	1	1	0	0.0166667	0.0408259	0.155556	0.113882	0.0213917	NaN	0.0359595	NaN	0.0677634	NaN	NaN	NaN	0.0305677	NaN	NaN	NaN	0.0429339	0.0269458	NaN	NaN	NaN	NaN	0.0078655
L5	0.019765	0.11471	0.03475	0.0868024	0.0221246	0.0730037	1	1	0.331846	0.344444	0.418132	0.518252	0.534749	0.565813	0.639516	0.647917	1	1	0.164444	0.202878	0.144881	0.233333	0.117669	0.115176	0.368939	0.0315771	0.453025	0.28463	0.0442203	0.33173	0.2256	0.235899	0.388786	0.32745	0.426604	0.312564	0.125442	0.313754	0.396771	0.071416	0.131518	0.146075
L6a	0.285605	0.314726	0.41419	0.325581	0.39509	0.269142	1	1	0.302231	0.255556	0.279542	0.469364	0.284589	0.360326	0.155928	0.230669	1	1	0.191111	0.29343	0.338061	0.370833	0.380873	0.409613	0.438589	0.470723	0.480726	0.490078	0.505087	0.512434	0.51308	0.521144	0.522749	0.525215	0.538982	0.539527	0.570105	0.574118	0.581417	0.718193	0.771029	0.772395
L6b	0	0.00969097	0.0347155	0.0120065	0.0492731	0.00577447	1	1	0.00542538	0	0.00310346	0	0.00148072	0.00341219	0	0.00452998	1	1	0	0.0866575	0.0418879	0	0.0509433	0.118825	0.0127715	0.0324007	0.00155438	0.0305822	0.412172	0.0905095	0.0443493	0.0918364	0.00375421	0.0380263	0.00058354	0.0271983	0.0110838	0.0246699	0.000626049	0.207259	0.0510221	0.0695515
	VISp contra
L2/3	0.385013	1	1	0.254362	0.257497	0.169909	0.154484	0.145093	0.400533	0.198307	0.0820177	0.024004	0.093108	0.114328	0.042921	0.2685	0.0266715	0.144758	0.079943	0.0612381	1	1	0.313098	0.183779	0.30288	0.209016	0.0280927	0.173097	0.0243516	0.236743	0	0.238494	0.197227	0.0567156	0.0735204	0.0275603	0.0780119	0.233578	0.0845829	0.20241	0.197453	0.131492	0.0834173	0.0249369
L4	NaN	1	1	0.040525	0.0516201	NaN	0.158365	0.131744	NaN	0.053091	NaN	NaN	NaN	0.0430703	NaN	NaN	0.0429422	NaN	NaN	NaN	1	1	0.0502134	0.037631	0.0223223	0.0941698	0.00340136	0.0155749	0.0155797	0.0496132	NaN	0.0836639	0.0182347	0	NaN	NaN	0.0101905	NaN	NaN	0.0288744	0.0441747	0.0102741	NaN	NaN
L5	0.0555556	1	1	0.351461	0.35915	0.437174	0.447146	0.457319	0.474298	0.479267	0.488833	0.493432	0.538618	0.548171	0.551955	0.561463	0.574316	0.613926	0.702082	0.803317	1	1	0.225393	0.30998	0.197084	0.230676	0.019623	0.228004	0.00694444	0.144188	0.115476	0.120936	0.160923	0.0918031	0.324222	0.33406	0.137555	0.0904821	0.238981	0.0976256	0.0648264	0.026975	0.199685	0.107236
L6a	0.0594315	1	1	0.32273	0.301083	0.296416	0.232356	0.246665	0.125169	0.267877	0.425043	0.480653	0.191655	0.292659	0.391918	0.159119	0.352848	0.23974	0.217975	0.126185	1	1	0.347329	0.384749	0.419221	0.442332	0.444842	0.460751	0.461381	0.504756	0.512302	0.520894	0.533188	0.553363	0.555992	0.591204	0.604143	0.607112	0.614085	0.614123	0.616005	0.657888	0.69342	0.84892
L6b	0	1	1	0.0309221	0.0306503	0.0965012	0.00764753	0.0191783	0	0.00145898	0.00410571	0.00191158	0.00995236	0.00177127	0.0132061	0.0109174	0.00322233	0.00157669	0	0.00925926	1	1	0.0639672	0.0838611	0.0584931	0.023806	0.170708	0.122574	0.15841	0.0647001	0.0388889	0.0360118	0.090427	0.298119	0.0462663	0.0471762	0.170099	0.0688285	0.0623513	0.0569669	0.0775411	0.173371	0.0234771	0.018907
	SSp-bfd contra
L2/3	0.363585	0.470161	0.529564	1	1	0.274286	0.21832	0.251692	0.115998	0.11825	0.119641	0.0442076	0.0438428	0.0322111	0.118677	0.050719	0.0408024	0.0258535	0.0369676	0.021154	0.104735	0.0737997	0.0946302	0.0548542	0.00431277	0.123217	0.0561692	0.0235526	1	1	0.0822303	0.284463	0.129942	0.277953	0.0577231	0.00873694	0.272771	0.119541	0.258886	0.42693	0.353313	0.00405694	0.294203	0.194089	0.0695965	0.0871488	0.189314	0.145987
L4	0.0493751	0.0254906	0.0771004	1	1	0.0366458	0.0266755	0.0258898	0.0150912	0.119663	NaN	0.0543082	NaN	0.102107	NaN	0.020939	NaN	NaN	NaN	NaN	0.0180129	0.012194	NaN	NaN	0.0840089	NaN	NaN	NaN	1	1	0.0417857	0.0825154	NaN	0.0408227	0.0145734	NaN	NaN	0.0117582	0.010932	0.0403342	0.0249914	NaN	0.0188241	0.0205979	NaN	NaN	NaN	0.0151515
L5	0.241055	0.0171441	0.043323	1	1	0.330358	0.364242	0.433368	0.441726	0.463929	0.464338	0.468164	0.491624	0.496672	0.503786	0.5251	0.554483	0.583967	0.60676	0.615702	0.61732	0.630634	0.647064	0.67798	0.770541	0.798242	0.853685	0.862829	1	1	0.32491	0.228709	0.134356	0.0833354	0.358261	0.392588	0.264599	0.229004	0.253028	0.026842	0.0872144	0.371863	0.0409069	0.131992	0.202762	0.280263	0.103627	0.0480435
L6a	0.314642	0.459399	0.327359	1	1	0.328253	0.20366	0.242815	0.413236	0.293564	0.388233	0.430444	0.463778	0.368272	0.367908	0.222712	0.366183	0.388846	0.355975	0.362689	0.0932655	0.282685	0.0777499	0.267166	0.140622	0.0785406	0.0901462	0.110146	1	1	0.369148	0.392541	0.394278	0.395504	0.397831	0.432008	0.450393	0.456085	0.459393	0.487311	0.498892	0.589842	0.611986	0.614483	0.618972	0.620126	0.624498	0.734748
L6b	0.0313429	0.0278053	0.0226529	1	1	0.0304564	0.0204365	0.0462356	0.0139481	0.00459388	0.0277877	0.0028756	0.000755392	0.000738126	0.00962819	0.0138635	0.0385321	0.00133333	0.00029656	0.000454338	0	0.000687574	0.0138889	0	0.000515996	0	0	0.00347222	1	1	0.0152595	0.0117722	0.00809061	0.035718	0.00494395	0	0.0122377	0.0169449	0.0177602	0.0185824	0.0355899	0.034238	0.0340804	0.0388383	0.10867	0.0124625	0.0825611	0.0560702
	MOp contra
L2/3	1	1	0.0208333	0.0238095	0.0106491	0.0277778	0	0	0.0458787	0.00638224	0.0104278	0.029177	0.0453047	1	1	0.202151	0.0423077	0.0954705	0.349066	0.176115	0.348975	0.0255959	0.00348444	0.342016	0	0.372505	0.0119048	0.0888344	0.00881109	0.0272066	0.182058	0.0758924	0.0680805	0.152925	0.218886	0.012107	0.00123457
L4	1	1	NaN	0	NaN	0.305556	0.0127227	0	NaN	0.0103666	NaN	NaN	NaN	1	1	NaN	0	NaN	NaN	NaN	0.0493381	NaN	0.000965613	0.0595195	NaN	0.046078	0.00757576	NaN	NaN	NaN	0.0167013	NaN	0.0278167	0.0253865	0.0164274	NaN	NaN
L5	1	1	0.355093	0.398962	0.415826	0.416667	0.499537	0.516667	0.520819	0.553295	0.670235	0.799458	0.881173	1	1	0.205591	0.0762821	0.344845	0.234679	0.381673	0.101174	0.480056	0.472899	0.0504771	0.450989	0.0187541	0.260737	0.171522	0.369441	0.314013	0.11242	0.252371	0.218087	0.0833685	0.0205908	0.236885	0.0424055
L6a	1	1	0.290741	0.243895	0.204255	0.194444	0.487123	0.15	0.4206	0.398062	0.319337	0.171365	0.073522	1	1	0.312473	0.35641	0.393018	0.411431	0.440438	0.490577	0.493519	0.522352	0.53921	0.549011	0.551904	0.553116	0.572977	0.619272	0.65822	0.662967	0.667816	0.669613	0.712719	0.723564	0.724303	0.813729
L6b	1	1	0	0	0.0359364	0.0555556	0.000617284	0	0.0127023	0.0318937	0	0	0	1	1	0.279785	0.025	0	0.00482318	0.00177379	0.0099359	0.000829187	0.000299222	0.00877665	0	0.0107585	0	0	0.00247525	0.000560715	0.0258537	0.0039213	0.0164019	0.025601	0.0205315	0.0267045	0.142631

## Sheet: Fig3D
Layer dominance per area (%)
VISp ipsi	L2/3	L5	L6		VISp contra	L2/3	L5	L6
mouse 1	20.4545	22.7273	54.5455		mouse 1	2.5	32.5	62.5
mouse 2	25	29.5455	40.9091		mouse 2	7.5	32.5	57.5
mouse 3	21.9512	36.5854	39.0244		mouse 3	0	44.4444	52.7778
mouse 4	27.2727	31.8182	38.6364		mouse 4	19.5122	31.7073	46.3415
mouse 5	25	31.8182	40.9091		mouse 5	5	45	47.5
mouse 6	11.6279	20.9302	65.1163		mouse 6	2.5641	30.7692	61.5385
SSp-bfd ipsi	L2/3	L5	L6		SSp-bfd contra	L2/3	L5	L6
mouse 1	22.7273	15.9091	59.0909		mouse 1	0	20	80
mouse 2	20.4545	43.1818	34.0909		mouse 2	4.54545	56.8182	36.3636
mouse 3	18.1818	45.4545	34.0909		mouse 3	11.1111	53.3333	33.3333
mouse 4	27.907	55.814	9.30233		mouse 4	13.6364	54.5455	29.5455
mouse 5	29.5455	43.1818	25		mouse 5	20	44.4444	33.3333
mouse 6	25	50	22.7273		mouse 6	8.88889	55.5556	33.3333
MOp ipsi	L2/3	L5	L6		MOp contra	L2/3	L5	L6
mouse 1	21.6216	21.6216	54.0541		mouse 1	9.67742	45.1613	45.1613
mouse 2	8.33333	16.6667	69.4444		mouse 2	0	25	75
mouse 3	21.875	21.875	53.125		mouse 3	10	36.6667	46.6667
mouse 4	18.1818	27.2727	51.5152		mouse 4	13.7931	31.0345	55.1724
mouse 5	23.0769	25.641	48.7179		mouse 5	6.06061	30.303	63.6364
mouse 6	7.69231	25.641	64.1026		mouse 6	6.45161	38.7097	51.6129

## Sheet: Fig3E
Layer dominance per area (%)
ipsi	L2/3	L5	L6		contra	L2/3	L5	L6
mouse 1	0.204545	0.227273	0.545455		mouse 1	0.025	0.325	0.625
mouse 2	0.25	0.295455	0.409091		mouse 2	0.075	0.325	0.575
mouse 3	0.219512	0.365854	0.390244		mouse 3	0	0.444444	0.527778
mouse 4	0.272727	0.318182	0.386364		mouse 4	0.195122	0.317073	0.463415
mouse 5	0.25	0.318182	0.409091		mouse 5	0.05	0.45	0.475
mouse 6	0.116279	0.209302	0.651163		mouse 6	0.025641	0.307692	0.615385
mouse 7	0.227273	0.159091	0.590909		mouse 7	0	0.2	0.8
mouse 8	0.204545	0.431818	0.340909		mouse 8	0.0454545	0.568182	0.363636
mouse 9	0.181818	0.454545	0.340909		mouse 9	0.111111	0.533333	0.333333
mouse 10	0.27907	0.55814	0.0930233		mouse 10	0.136364	0.545455	0.295455
mouse 11	0.295455	0.431818	0.25		mouse 11	0.2	0.444444	0.333333
mouse 12	0.25	0.5	0.227273		mouse 12	0.0888889	0.555556	0.333333
mouse 13	0.216216	0.216216	0.540541		mouse 13	0.0967742	0.451613	0.451613
mouse 14	0.0833333	0.166667	0.694444		mouse 14	0	0.25	0.75
mouse 15	0.21875	0.21875	0.53125		mouse 15	0.1	0.366667	0.466667
mouse 16	0.181818	0.272727	0.515152		mouse 16	0.137931	0.310345	0.551724
mouse 17	0.230769	0.25641	0.487179		mouse 17	0.0606061	0.30303	0.636364
mouse 18	0.0769231	0.25641	0.641026		mouse 18	0.0645161	0.387097	0.516129
