# Supplementary material for: Layer 6 corticocortical neurons are a major route for intra- and interhemispheric feedback
Source: eLife. 2025 Mar 28;13:RP100478. doi: 10.7554/eLife.100478 (PMC11952746; doi:10.7554/eLife.100478)
Supplement: Figure 4—figure supplement 1—source data 1. [file elife-100478-fig4-figsupp1-data1.xlsx]

## Sheet: Fig4_supp1C
Fraction of neruons	'VISpl'	'VISpor'	'VISli'	'VISl'	'VISp'	'VISal'	'VISa'	'VISpm'	'VISrl'	'VISam'
L2/3	0.155934	0.292677	0.373052	0.427361	NaN	0.428576	0.36096	0.306113	0.304384	0.237714
L4	0.0416316	0.0541165	0.14363	0.130391	NaN	0.111183	0.0766911	0.102117	0.0568887	0.0833866
L5	0.417156	0.423745	0.212059	0.131697	NaN	0.142933	0.228161	0.331521	0.0851159	0.368233
L6a	0.373919	0.221709	0.247312	0.281827	NaN	0.277498	0.28038	0.229331	0.479293	0.273044
L6b	0.011359	0.00775337	0.0239476	0.0287241	NaN	0.0398111	0.053807	0.0309182	0.0743194	0.0376224

## Sheet: Fig4_supp1D
fILN	ventral					dorsal
ipsi	'VISpl'	'VISpor'	'VISli'	'VISl'	'VISp'	'VISal'	'VISa'	'VISpm'	'VISrl'	'VISam'
mean	0.837049	0.689917	0.565568	0.50816	NaN	0.516474	0.609597	0.660637	0.673656	0.739681
sem	0.0381875	0.0251472	0.0228749	0.0271304	NaN	0.0399689	0.0214976	0.0544225	0.0523589	0.0395399
fILN	ventral					dorsal
contra	'VISpl'	'VISpor'	'VISli'	'VISl'	'VISp'	'VISal'	'VISa'	'VISpm'	'VISrl'	'VISam'
mean	0.879279	0.789774	0.767884	0.738179	NaN	0.746998	0.82326	0.66766	0.789938	0.806268
sem	0.0418112	0.0394496	0.021658	0.0271855	NaN	0.047479	0.0417183	0.0282432	0.0451673	0.0356101
