# Supplementary material for: Layer 6 corticocortical neurons are a major route for intra- and interhemispheric feedback
Source: eLife. 2025 Mar 28;13:RP100478. doi: 10.7554/eLife.100478 (PMC11952746; doi:10.7554/eLife.100478)
Supplement: Figure 4—figure supplement 2—source data 1. [file elife-100478-fig4-figsupp2-data1.xlsx]

## Sheet: Fig4_supp2A
VISp ipsi	area 1	area 2	area 3	area 4	area 5	area 6	area 7	area 8	area 9	area 10	area 11	area 12	area 13	area 14	area 15	area 16	area 17	area 18	area 19	area 20	area 21	area 22	area 23	area 24	area 25	area 26	area 27	area 28	area 29	area 30	area 31	area 32	area 33	area 34	area 35	area 36	area 37	area 38	area 39	area 40
mean	0.495842	0.507506	0.50816	0.516474	0.533059	0.54441	0.565568	0.591335	0.609597	0.660637	0.673656	0.685725	0.686398	0.689917	0.731117	0.738748	0.739681	0.742706	0.748328	0.781376	0.787841	0.811107	0.816279	0.837049	0.846415	0.854086	0.859048	0.86367	0.894942	0.897988	0.915135	0.9242	0.945648	0.948808	0.95132	0.969787	0.97077	0.982123	0.996095	0.999076
sem	0.130711	0.021706	0.0271304	0.0399689	0.0431265	0.0717878	0.0228749	0.0277322	0.0214976	0.0544225	0.0523589	0.0288939	0.0533676	0.0251472	0.0450101	0.0230382	0.0395399	0.00894394	0.037077	0.0250083	0.0690261	0.0562001	0.041369	0.0381875	0.0223497	0.0178882	0.0203464	0.0576331	0.00678774	0.0157429	0.0333401	0.0425565	0.0151908	0.0181557	0.00748485	0.0151893	0.0179596	0.00474504	0.00121478	0.000453895
contra
mean	0.599467	0.727184	0.738179	0.746998	0.687879	0.7315	0.767884	0.732357	0.82326	0.66766	0.789938	0.921142	0.830091	0.789774	0.796181	0.810657	0.806268	0.943284	0.866494	0.92648	0.766422	0.855242	0.825242	0.879279	0.97244	0.916583	0.920057	0.229974	0.917982	0.957755	0.962321	0.957079	0.88827	0.938762	0.975996	0.915417	0.971736	0.975063	0.986128	1
sem	0.106518	0.0444512	0.0271855	0.047479	0.0702361	0.0506358	0.021658	0.0693165	0.0417183	0.0282432	0.0451673	0.00925064	0.0359934	0.0394496	0.0779819	0.0423935	0.0356101	0.0154936	0.0446083	0.0223486	0.0773571	0.0444256	0.0541457	0.0418112	0.00813717	0.0186444	0.024908	0.218449	0.0176492	0.0356408	0.0126732	0.0216962	0.0182156	0.0174515	0.00483965	0.0422817	0.00701633	0.00731524	0.0038597	0

## Sheet: Fig4_supp2B
SSp-bfd ipsi	area 1	area 2	area 3	area 4	area 5	area 6	area 7	area 8	area 9	area 10	area 11	area 12	area 13	area 14	area 15	area 16	area 17	area 18	area 19	area 20	area 21	area 22	area 23	area 24	area 25	area 26	area 27	area 28	area 29	area 30	area 31	area 32	area 33	area 34	area 35	area 36	area 37	area 38	area 39	area 40	area 41	area 42	area 43	area 44
mean	0.224492	0.246645	0.346898	0.395882	0.468061	0.478473	0.485669	0.512187	0.512798	0.521442	0.535064	0.557777	0.583361	0.642768	0.679045	0.704959	0.728224	0.768128	0.791836	0.819072	0.82531	0.827135	0.835772	0.851185	0.863556	0.872456	0.877942	0.89012	0.898123	0.904176	0.914788	0.915059	0.916904	0.917241	0.919067	0.945458	0.948609	0.953132	0.969252	0.969463	0.972056	0.991647	0.995119	0.99829
sem	0.0541942	0.0409551	0.0555677	0.0368047	0.072362	0.0856733	0.100421	0.0139127	0.0592091	0.100985	0.0689798	0.0454913	0.0264426	0.0906402	0.0483902	0.143517	0.0698537	0.0420669	0.0644257	0.01579	0.0266148	0.0503466	0.0399995	0.00998394	0.0298353	0.0333587	0.011171	0.00783462	0.0561932	0.0387704	0.0285805	0.0076101	0.0228309	0.0189623	0.0256449	0.026294	0.0304071	0.00989801	0.00991175	0.00822925	0.00421216	0.003908	0.00263522	0.00110592
contra
mean	0.802126	0.641151	0.854054	0.88106	0.516734	0.699039	0.54773	0.689225	0.616108	0.636414	0.715225	0.737824	0.929025	0.723809	0.912851	0.850036	0.870987	0.925216	0.739206	0.881323	0.937597	0.862679	0.876783	0.956157	0.727229	0.881754	0.880359	0.959198	0.930404	0.810686	0.951894	0.974147	0.960677	0.943831	0.978846	0.989516	0.805087	0.886444	0.976447	0.945146	0.963032	0.99499	0.995891	0.995943
sem	0.0520308	0.0934773	0.0517941	0.0854442	0.0997826	0.090279	0.0951748	0.019098	0.0405039	0.076483	0.031991	0.0290326	0.0237355	0.0797923	0.0210648	0.0446083	0.0447851	0.0191215	0.0739147	0.0122679	0.00940911	0.0311874	0.0400789	0.0103991	0.0517562	0.0262861	0.0250043	0.00242554	0.0230823	0.0748928	0.0153471	0.00903912	0.0166123	0.0143607	0.00813709	0.00727607	0.0634079	0.0768777	0.00777042	0.044515	0.0178691	0.00241866	0.00307703	0.00198006

## Sheet: Fig4_supp2C
MOp ipsi	area 1	area 2	area 3	area 4	area 5	area 6	area 7	area 8	area 9	area 10	area 11	area 12	area 13	area 14	area 15	area 16	area 17	area 18	area 19	area 20	area 21	area 22	area 23	area 24	area 25	area 26	area 27	area 28	area 29	area 30	area 31	area 32
mean	0.388637	0.468531	0.485731	0.485743	0.508771	0.553944	0.619619	0.700778	0.71131	0.725433	0.795444	0.820299	0.820819	0.863432	0.87541	0.883115	0.890691	0.912542	0.915289	0.918697	0.929552	0.934673	0.935305	0.939636	0.953569	0.961479	0.966169	0.978814	0.987616	0.995846	0.996868	1
sem	0.0354513	0.012842	0.049262	0.0422559	0.0406276	0.0397359	0.0201175	0.0149774	0.117889	0.031179	0.0463014	0.0338893	0.0260705	0.0121361	0.0265301	0.0196322	0.00918618	0.0119794	0.0351606	0.0108181	0.0142212	0.0154941	0.0148262	0.0123324	0.013168	0.0139781	0.00656262	0.00903244	0.00785038	0.0010208	0.00107924	0
contra
mean	0.608199	0.632829	0.813823	0.630749	0.84197	0.773617	0.92979	0.823885	0.8	0.915385	0.954695	0.924108	0.972793	0.996513	0.964286	0.970823	0.954121	0.885435	1	1	0.989572	0.984026	0.893399	0.96875	0.987893	0.797849	0.974404	0.991189	0.985714	0.993594	0.998765	1
sem	0.0665678	0.0588216	0.0359694	0.0777275	0.0801365	0.100934	0.00992789	0.0487615	0.2	0.0450728	0.0151058	0.036202	0.0112695	0.00125494	0.0357143	0.0123632	0.00566107	0.0695827	0	0	0.00700972	0.00928029	0.0944847	0.03125	0.00299037	0.135219	0.00629559	0.00333533	0.0142857	0.00344283	0.00123457	0
