# Supplementary material for: Layer 6 corticocortical neurons are a major route for intra- and interhemispheric feedback
Source: eLife. 2025 Mar 28;13:RP100478. doi: 10.7554/eLife.100478 (PMC11952746; doi:10.7554/eLife.100478)
Supplement: Figure 4—source data 1. [file elife-100478-fig4-data1.xlsx]

## Sheet: Fig4C
hemispheric fILN
VISp	ipsi	contra
mouse 1	0.713005	0.791217
mouse 2	0.688096	0.817038
mouse 3	0.719749	0.864435
mouse 4	0.689083	0.688704
mouse 5	0.668381	0.723416
mouse 6	0.767922	0.874562
SSp-bfd	ipsi	contra
mouse 1	0.696667	0.858877
mouse 2	0.687505	0.769107
mouse 3	0.695634	0.67007
mouse 4	0.522357	0.693767
mouse 5	0.661009	0.705693
mouse 6	0.656459	0.729195
MOp-bfd	ipsi	contra
mouse 1	0.648493	0.735423
mouse 2	0.726982	0.812205
mouse 3	0.594052	0.753236
mouse 4	0.646091	0.72851
mouse 5	0.666243	0.741759
mouse 6	0.685201	0.712312

## Sheet: Fig4D
fILN ipsi	area 1	area 2	area 3	area 4	area 5	area 6	area 7	area 8	area 9	area 10	area 11	area 12	area 13	area 14	area 15	area 16	area 17	area 18	area 19	area 20	area 21	area 22	area 23	area 24	area 25	area 26	area 27	area 28	area 29	area 30	area 31	area 32	area 33	area 34	area 35	area 36	area 37	area 38	area 39	area 40	area 41	area 42	area 43	area 44	area 45
mouse 1	0.857143	0.956623	0.993211	0.979167	0.95203	0.720302	0.827907	0.438858	0.998856	1	0.982659	1	0.950495	0.739104	0.289737	0.760528	0.736264	0.765998	0.705882	0.726351	0.867052	0.971429	1	1	0.90641	0.896648	0.752569	0.631197	0.531711	0.467002	NaN	0.719725	0.518146	0.66192	0.82591	0.852469	0.841385	0.836037	0.978208	0.566276	0.538108	0.583692	0.706989	0.763827	0.912631
mouse 2	0.878788	0.965416	0.997193	0.971925	0.907473	0.707495	0.795511	0.58194	0.998198	0.97093	0.942408	1	1	0.709092	0.212631	0.594991	0.728831	0.73588	0.718327	0.758197	0.881188	0.907407	1	1	0.876663	0.920092	0.888526	0.676525	0.590364	0.47789	NaN	0.681716	0.476182	0.639044	0.68362	0.77203	0.801699	0.846136	0.962794	0.493289	0.61563	0.505616	0.755059	0.561568	0.993645
mouse 3	NaN	0.926426	1	0.712329	1	0.466667	0.89781	0.306818	1	0.97561	1	1	0.984127	0.773263	0.941176	0.978982	0.73301	0.728953	0.666667	0.736842	0.9	0.833333	NaN	NaN	0.745763	0.868354	0.850804	0.783338	0.506737	0.500827	NaN	0.615058	0.491446	0.616601	0.682918	0.755801	0.860539	0.929253	0.994565	0.466192	0.642287	0.447608	0.958146	0.989748	0.990621
mouse 4	1	0.957205	0.992009	0.953519	0.93985	0.772812	0.926335	0.780656	0.997403	0.949275	0.896226	1	1	0.831854	0.410214	0.915704	0.578095	0.594365	0.615148	0.711538	0.852713	0.80303	1	1	0.836645	0.892093	0.951815	0.740068	0.598003	0.497337	NaN	0.526846	0.456913	0.557844	0.431025	0.58882	0.727066	0.868777	0.991676	0.451693	0.512884	0.475125	0.912505	0.728856	0.998648
mouse 5	0.71875	0.931132	0.997738	0.957245	0.903382	0.837432	0.827692	0.696113	1	0.991453	0.897196	0.989796	0.89	0.676365	0.264151	0.751869	0.690506	0.796598	0.610482	0.770833	0.944444	1	1	1	0.861027	0.892461	0.878844	0.626364	0.516984	0.465521	NaN	0.601602	0.446674	0.532577	0.608486	0.663556	0.728456	0.796605	0.978294	0.487893	0.551338	0.474493	0.737877	0.698079	0.932572
mouse 6	NaN	0.971119	0.996422	0.971014	0.971154	0.613678	0.879032	0.462075	1	0.963415	0.974359	1	1	0.70281	0.857143	0.864566	0.92	0.868177	0.797844	0.752475	0.942529	0.97561	1	1	0.851986	0.9	0.699737	0.68201	0.64961	0.640381	NaN	0.896989	0.709485	0.649598	0.731862	0.805411	0.729113	0.847709	0.987202	0.73301	0.687764	0.558501	0.827098	0.984968	0.990605
mouse 7	0.958637	0.977153	1	0.99811	1	0.920165	0.937107	0.808282	0.999252	0.990476	0.893805	1	0.946023	0.985641	0.896714	0.955202	0.548832	NaN	0.417266	0.671362	0.608384	0.622733	0.524223	0.762681	0.690271	0.863045	0.909091	0.894309	0.65	0.219512	0.276596	0.2	0.268657	0.518116	0.413793	0.6	0.88764	0.923077	1	0.768817	0.953488	0.878049	0.87812	0.993141	1
mouse 8	0.910448	0.983566	0.996078	0.985861	0.954887	0.868872	0.921827	0.811208	1	0.959302	0.947581	0.977049	0.889102	0.852916	0.850806	0.852636	0.524331	NaN	0.643604	0.632259	0.595121	0.53888	0.70987	0.934426	0.816212	0.881899	0.630728	0.634576	0.479134	0.305953	0.386868	0.332591	0.464476	0.65049	0.766608	0.856757	0.85875	0.90337	0.994198	0.482605	0.85757	0.750861	0.757143	0.752722	0.845123
mouse 9	1	0.962869	0.99733	0.962699	0.944724	0.885017	0.90812	0.783265	0.999334	0.978261	0.912863	0.992771	0.849057	0.902322	0.691525	0.852331	0.507646	NaN	0.602838	0.631549	0.600591	0.60189	0.720509	0.912713	0.749258	0.863392	0.579842	0.677892	0.620419	0.408469	0.31205	0.313636	0.513788	0.711446	0.74065	0.861826	0.923159	0.852179	0.969932	0.503027	0.747601	0.803594	0.72837	0.908251	0.966547
mouse 10	0.979798	0.981001	1	0.954497	0.938144	0.887226	0.916667	0.861913	1	1	NaN	1	0.944444	0.947368	0.923611	0.982624	0.451143	NaN	0.283706	0.023743	0.062088	0.158265	0.053679	0.00632911	0.465612	0.825553	0.549505	0.785714	0.569149	0.572165	0.0425743	0.0711167	0.320588	0.241092	0.875421	0.98722	0.87395	0.722222	0.8	0.597561	0.953125	0.890173	0.918033	0.954094	0.641327
mouse 11	0.992366	0.970015	0.982684	0.971957	0.948454	0.904762	0.882353	0.870249	0.99823	0.937853	0.969359	0.997067	0.999227	0.983955	0.91358	0.985592	0.505947	NaN	0.484189	0.54418	0.514294	0.362555	0.394303	0.877301	0.69659	0.818233	0.951351	0.870096	0.635389	0.206492	0.090085	0.320393	0.39905	0.469046	0.318417	0.598419	0.843137	0.895105	0.960622	0.499018	0.907621	0.877907	0.99895	0.984898	0.992233
mouse 12	0.831496	0.95773	0.994624	0.943653	0.932584	0.874677	0.924282	0.779514	0.992921	0.949622	0.862595	0.982993	0.87357	0.816523	0.738397	0.886019	0.535221	NaN	0.645186	0.62556	0.490357	0.524041	0.511431	0.736306	0.656326	0.854989	0.748828	0.74618	0.546075	0.368797	0.238777	0.242131	0.408734	0.620197	0.741718	0.846795	0.881018	0.885384	0.966903	0.495633	0.815331	0.751276	0.682195	0.83195	0.943505
mouse 13	0.870785	0.974077	0.933333	0.985948	0.869565	0.852718	0.91195	0.766716	0.95148	0.936	0.958541	0.995362	0.88785	0.953998	0.821656	0.954111	0.6612	0.448452	0.645161	0.335188	0.458004	0.350064	0.499296	0.460142	NaN	0.700353	NaN	1	NaN	NaN	0.666667	0.25	NaN	0.578947	NaN	NaN	0.9	0.78	0.897436	0.756522	1	NaN	0.924829	0.998195	0.979592
mouse 14	0.906351	0.963554	1	0.984293	1	0.908982	0.976471	0.888579	0.976709	0.981481	0.877193	0.995204	0.875339	0.918288	0.830986	0.919708	0.679001	0.622071	0.871795	0.575064	0.476335	0.445644	0.625573	0.578256	NaN	0.756249	NaN	1	NaN	NaN	1	0.47619	NaN	0.833333	NaN	NaN	0.967742	0.963415	0.903614	0.772727	NaN	NaN	0.877551	0.995327	0.97561
mouse 15	0.8271	0.963203	1	0.978193	NaN	0.898712	0.925	0.896907	0.920327	0.884615	0.836066	0.996697	0.805415	0.947987	0.945312	0.976636	0.538403	0.354052	0.7	0.381215	0.427617	0.334335	0.386097	0.461038	NaN	0.646083	NaN	1	NaN	NaN	NaN	NaN	NaN	NaN	NaN	NaN	NaN	0.833333	0.888889	0.636364	0.8	NaN	0.951049	0.992701	0.984127
mouse 16	0.728015	0.971114	NaN	0.995665	NaN	0.882022	0.9	0.827586	0.969866	0.942308	0.848168	1	0.864407	0.893788	0.60274	0.873635	0.602803	0.544041	0.712644	0.513747	0.448965	0.266861	0.640038	0.287417	NaN	0.716191	1	1	NaN	NaN	NaN	NaN	NaN	0.592593	NaN	NaN	0.931034	0.977612	0.926471	0.333333	NaN	NaN	0.806452	1	0.939394
mouse 17	0.815394	0.938418	1	0.935528	0.98	0.886557	0.913043	0.860835	0.911	0.89697	0.923463	0.992308	0.866755	0.896309	0.82197	0.924822	0.619386	0.488847	0.718563	0.583974	0.519127	0.504621	0.558328	0.488038	NaN	0.680667	1	0.964912	NaN	0.777778	0.428571	0.5	NaN	0.578947	NaN	NaN	0.963918	0.959596	0.892857	0.590909	0.870968	NaN	0.789298	0.998686	0.988636
mouse 18	0.777273	0.986646	1	0.993258	0.987448	0.915155	0.985367	0.681172	0.992032	0.966667	0.855263	0.995508	0.880824	0.901814	0.75	0.928401	0.61692	0.595164	0.704433	0.525269	0.48114	0.430298	0.614335	0.639494	NaN	0.705124	1	0.960784	NaN	1	0.75	0.666667	NaN	0.710938	NaN	NaN	0.935484	0.977778	0.965986	0.843575	0.926829	NaN	0.903279	0.996296	0.901515
fILN contra	area 1	area 2	area 3	area 4	area 5	area 6	area 7	area 8	area 9	area 10	area 11	area 12	area 13	area 14	area 15	area 16	area 17	area 18	area 19	area 20	area 21	area 22	area 23	area 24	area 25	area 26	area 27	area 28	area 29	area 30	area 31	area 32	area 33	area 34	area 35	area 36	area 37	area 38	area 39	area 40	area 41	area 42	area 43	area 44	area 45
mouse 1	NaN	0.980132	0.988372	0.962963	0.859375	0.828829	0.961165	0.701681	1	NaN	0.973684	NaN	0.970803	0.91369	0.609524	0.919395	0.702265	0.825758	0.913706	0.92	0.979167	1	NaN	NaN	0.975207	0.959559	0.796773	0.736657	0.768555	0.818281	0.786683	0.719816	0.733372	0.744879	0.56457	0.714642	0.833405	0.852609	0.952612	0.615936	0.690508	0.720618	0.893077	0.781641	0.77971
mouse 2	0	0.953704	0.980989	1	0.875	0.826667	0.925373	0.646739	NaN	NaN	0.930556	NaN	0.951724	0.852241	0.388773	0.743928	0.870886	0.864955	0.904215	0.974359	1	0.954545	NaN	NaN	0.94702	0.837772	0.930142	0.75755	0.8252	0.757728	0.859325	0.806649	0.711691	0.761644	0.659008	0.788245	0.928167	0.902321	0.97	0.7513	0.777283	0.788741	0.824791	0.631107	0.929658
mouse 3	NaN	0.983871	1	1	NaN	0.708333	1	0.708333	NaN	NaN	0.931034	NaN	1	0.889671	1	0.996552	0.963636	0.970874	0.909091	1	NaN	NaN	NaN	NaN	1	0.942529	0.988732	0.952765	0.823171	0.701671	0.82367	0.873662	0.848684	0.8	0.688679	0.728477	0.993939	0.960526	0.984252	0.736842	0.939024	0.801802	1	1	1
mouse 4	0.666667	0.982609	0.97973	0.947368	0.85	0.867925	0.828571	0.745562	1	NaN	0.918919	NaN	0.965909	0.728114	0.392265	0.860048	0.460526	0.676966	0.901099	0.946429	0.851852	0.947368	NaN	NaN	0.95935	0.941176	0.977208	0.827525	0.697125	0.692186	0.657999	0.635172	0.563134	0.734194	0.640159	0.785614	0.966601	0.963033	0.991903	0.387793	0.444694	0.536433	0.713109	0.622517	0.99711
mouse 5	NaN	0.97166	0.974576	0.857143	0.906977	0.971014	0.875	0.967213	1	NaN	0.878378	NaN	0.981982	0.643776	0.38806	0.711385	0.82	0.89083	0.955882	0.918919	1	0.947368	NaN	NaN	0.990099	0.912879	0.73646	0.668127	0.716467	0.652865	0.718225	0.759162	0.730534	0.918072	0.676564	0.885892	0.92201	0.879121	0.957009	0.738204	0.694256	0.681524	0.634171	0.575175	0.792561
mouse 6	0.0232558	0.984	0.993103	0.975	0.95	0.777778	0.930233	0.619469	1	NaN	1	NaN	0.96	0.836449	0.818182	0.900145	0.95977	0.969582	0.942857	0.9	NaN	NaN	NaN	NaN	0.962963	0.913978	0.846361	0.79602	0.776786	0.806343	0.891786	0.94517	0.894574	0.980769	0.776978	0.934737	0.914754	0.941886	0.994602	0.897196	0.848375	0.833984	0.886305	0.988095	0.993464
mouse 7	0.984615	1	NaN	1	NaN	0.967581	1	0.872093	0.989011	1	0.97686	1	0.99686	0.997253	0.989247	0.999041	0.768761	0.546736	0.758621	0.568306	0.850267	0.647249	0.586755	0.988095	0.949884	0.979009	NaN	1	NaN	NaN	0.75	NaN	NaN	0.7	NaN	0.785714	0.793103	0.666667	NaN	0.8125	1	NaN	0.956522	1	1
mouse 8	NaN	0.932384	1	0.723684	0.583333	0.963455	0.964912	0.884393	0.991525	0.96	0.982456	1	0.940559	0.89772	0.737864	0.95261	0.685439	0.563517	0.677481	0.875666	0.902685	0.754209	0.658933	0.941176	0.961862	0.961702	0.880952	0.918919	1	0.957265	0.902098	0.624521	0.962085	0.820197	0.822034	0.853125	0.956432	0.869942	0.92233	0.725552	0.821586	0.97	0.726257	0.514863	0.913561
mouse 9	1	0.889558	0.995327	0.969178	0.934783	0.95086	0.945783	0.911111	0.995122	1	0.894619	0.989583	0.905337	0.949137	0.806306	0.974328	0.65633	0.318246	0.532417	0.590554	0.582499	0.37379	0.270942	0.772727	0.90047	0.90709	0.70155	0.85376	0.920904	0.865116	0.950549	0.881988	0.98062	0.759843	0.711538	0.829508	0.822809	0.56993	0.627451	0.815043	0.885989	0.92487	0.90303	0.702793	0.93712
mouse 10	1	0.993908	1	0.99569	0.980769	0.954897	1	0.920588	1	0.973684	0.944304	1	0.993631	0.975405	0.972727	0.996156	0.690715	0.329322	0.488421	0.331104	0.32613	0.101504	0.319137	0.7375	0.821577	0.972553	0.895238	0.913884	0.935484	0.788462	0.641026	0.605263	0.943662	0.644172	0.866667	0.823529	0.907692	0.785714	NaN	0.707965	0.895753	0.938356	0.870912	0.907387	0.832402
mouse 11	0.962963	0.992647	1	0.994792	1	0.959002	0.975	0.847291	1	0.966667	0.910931	0.986667	0.92922	0.919072	0.845103	0.958927	0.631456	0.457765	0.58982	0.75873	0.862423	0.696486	0.906863	0.75	0.942857	0.956589	0.966667	0.93253	0.85124	0.692982	0.684783	0.326241	0.540323	0.611429	0.421053	0.375	0.915888	0.853933	0.858974	0.625144	0.844156	0.914163	0.854772	0.961728	0.964912
mouse 12	1	0.969697	0.984127	0.987531	0.933333	0.959391	0.959184	0.852459	1	0.958333	0.953815	0.993691	0.998454	0.972777	0.909449	0.992014	0.702647	0.329101	0.649888	0.694126	0.670232	0.52717	0.54375	0.910714	0.900457	0.96	0.910526	0.932203	0.9375	0.966443	0.884298	0.767742	0.97861	0.755708	0.797753	0.768362	0.886228	0.617188	0.811594	0.740741	0.843038	0.940594	0.864583	0.777347	0.934426
mouse 13	0.955752	0.982412	NaN	0.995968	NaN	0.956989	1	0.968085	0.993166	0.970588	0.993559	0.990446	0.998201	1	0.952096	0.996552	0.894334	0.909091	1	0.426036	0.567345	0.603774	0.93662	0.869919	0.63072	0.878963	NaN	1	NaN	NaN	1	NaN	NaN	NaN	NaN	NaN	NaN	1	0.888889	NaN	NaN	NaN	0.857143	1	0.666667
mouse 14	1	0.990798	NaN	0.9869	NaN	0.947037	0.979167	0.987342	0.991398	1	0.992481	0.978723	0.994475	1	0.934426	0.994334	0.942529	0.925926	NaN	0.6	0.777778	0.655172	0.9375	0.89	0.687849	0.869426	NaN	NaN	NaN	NaN	1	NaN	NaN	NaN	NaN	NaN	NaN	1	1	NaN	NaN	NaN	1	1	NaN
mouse 15	0.994152	0.983051	NaN	1	NaN	0.936111	NaN	0.8125	0.983454	1	0.914239	1	0.991471	1	0.902256	0.99633	0.915641	0.947368	NaN	0.402778	0.423838	0.506329	0.873016	0.898256	0.654946	0.895199	NaN	1	NaN	NaN	NaN	NaN	NaN	NaN	NaN	NaN	1	1	1	NaN	NaN	NaN	NaN	1	1
mouse 16	0.985816	0.976857	NaN	0.989899	NaN	0.971253	1	0.98913	0.981735	NaN	0.971698	1	1	1	1	1	0.91831	0.451613	NaN	0.85	0.599884	0.409283	0.303571	0.688073	0.632427	0.896562	NaN	1	NaN	NaN	1	NaN	NaN	NaN	NaN	NaN	1	1	0.621622	NaN	NaN	NaN	NaN	1	1
mouse 17	0.974619	0.948133	NaN	0.977667	NaN	0.945003	0.516129	0.98	0.979613	0.965517	0.989384	0.992395	0.998117	1	0.993939	0.995479	0.949672	0.843137	0.9	0.818182	0.612725	0.583333	0.694444	0.731023	0.630179	0.815462	1	1	NaN	NaN	1	NaN	NaN	NaN	NaN	NaN	1	1	0.916667	NaN	NaN	NaN	1	1	1
mouse 18	0.926421	0.965174	NaN	0.9967	NaN	0.968335	0.971698	0.807588	0.997992	NaN	0.963576	1	0.996815	1	0.945455	0.954738	0.958254	0.974684	0.846154	0.6875	0.815405	0.891304	0.896552	0.805668	0.669483	0.587697	1	0.928571	NaN	NaN	0	NaN	NaN	NaN	NaN	NaN	0.875	1	NaN	NaN	NaN	NaN	1	0.992593	0.322581
mean sorted
ipsi sort	contra
0.419219	0.797085
0.456178	0.807935
0.463416	0.722308
0.493438	0.790849
0.574465	0.84113
0.582136	0.712851
0.583297	0.736816
0.590611	0.66243
0.597807	0.769242
0.614997	0.738889
0.620974	0.805065
0.62855	0.710859
0.641319	0.797977
0.651702	0.693182
0.66104	0.660674
0.666408	0.822826
0.709019	0.810315
0.714361	0.831929
0.727927	0.845643
0.76273	0.845408
0.765759	0.772737
0.773784	0.807055
0.81522	0.895207
0.815635	0.899341
0.822403	0.91447
0.826109	0.894662
0.839608	0.874042
0.857411	0.92085
0.862005	0.919752
0.877644	0.881271
0.878271	0.81959
0.886575	0.94122
0.896295	0.858625
0.903137	0.931307
0.916338	0.951139
0.917035	0.976309
0.94313	0.886128
0.947758	0.89986
0.951856	0.887357
0.957492	0.964471
0.95968	0.979479
0.963182	0.971144
0.983645	0.993939
0.992978	0.990566
0.995264	0.994292

## Sheet: Fig4E
fILN ipsi
VISp	area 1	area 2	area 3	area 4	area 5	area 6	area 7	area 8	area 9	area 10	area 11	area 12	area 13	area 14	area 15	area 16	area 17	area 18	area 19	area 20	area 21	area 22	area 23	area 24	area 25	area 26	area 27	area 28	area 29	area 30	area 31	area 32	area 33	area 34	area 35	area 36	area 37	area 38	area 39	area 40	area 41	area 42	area 43	area 44	area 45
mouse 1	0.857143	0.956623	0.993211	0.979167	0.95203	0.720302	0.827907	0.438858	0.998856	1	0.982659	1	0.950495	0.739104	0.289737	0.760528	0.736264	0.765998	0.705882	0.726351	0.867052	0.971429	1	1	0.90641	0.896648	0.752569	0.631197	0.531711	0.467002	NaN	0.719725	0.518146	0.66192	0.82591	0.852469	0.841385	0.836037	0.978208	0.566276	0.538108	0.583692	0.706989	0.763827	0.912631
mouse 2	0.878788	0.965416	0.997193	0.971925	0.907473	0.707495	0.795511	0.58194	0.998198	0.97093	0.942408	1	1	0.709092	0.212631	0.594991	0.728831	0.73588	0.718327	0.758197	0.881188	0.907407	1	1	0.876663	0.920092	0.888526	0.676525	0.590364	0.47789	NaN	0.681716	0.476182	0.639044	0.68362	0.77203	0.801699	0.846136	0.962794	0.493289	0.61563	0.505616	0.755059	0.561568	0.993645
mouse 3	NaN	0.926426	1	0.712329	1	0.466667	0.89781	0.306818	1	0.97561	1	1	0.984127	0.773263	0.941176	0.978982	0.73301	0.728953	0.666667	0.736842	0.9	0.833333	NaN	NaN	0.745763	0.868354	0.850804	0.783338	0.506737	0.500827	NaN	0.615058	0.491446	0.616601	0.682918	0.755801	0.860539	0.929253	0.994565	0.466192	0.642287	0.447608	0.958146	0.989748	0.990621
mouse 4	1	0.957205	0.992009	0.953519	0.93985	0.772812	0.926335	0.780656	0.997403	0.949275	0.896226	1	1	0.831854	0.410214	0.915704	0.578095	0.594365	0.615148	0.711538	0.852713	0.80303	1	1	0.836645	0.892093	0.951815	0.740068	0.598003	0.497337	NaN	0.526846	0.456913	0.557844	0.431025	0.58882	0.727066	0.868777	0.991676	0.451693	0.512884	0.475125	0.912505	0.728856	0.998648
mouse 5	0.71875	0.931132	0.997738	0.957245	0.903382	0.837432	0.827692	0.696113	1	0.991453	0.897196	0.989796	0.89	0.676365	0.264151	0.751869	0.690506	0.796598	0.610482	0.770833	0.944444	1	1	1	0.861027	0.892461	0.878844	0.626364	0.516984	0.465521	NaN	0.601602	0.446674	0.532577	0.608486	0.663556	0.728456	0.796605	0.978294	0.487893	0.551338	0.474493	0.737877	0.698079	0.932572
mouse 6	NaN	0.971119	0.996422	0.971014	0.971154	0.613678	0.879032	0.462075	1	0.963415	0.974359	1	1	0.70281	0.857143	0.864566	0.92	0.868177	0.797844	0.752475	0.942529	0.97561	1	1	0.851986	0.9	0.699737	0.68201	0.64961	0.640381	NaN	0.896989	0.709485	0.649598	0.731862	0.805411	0.729113	0.847709	0.987202	0.73301	0.687764	0.558501	0.827098	0.984968	0.990605
fILN delta
VISp	area 1	area 2	area 3	area 4	area 5	area 6	area 7	area 8	area 9	area 10	area 11	area 12	area 13	area 14	area 15	area 16	area 17	area 18	area 19	area 20	area 21	area 22	area 23	area 24	area 25	area 26	area 27	area 28	area 29	area 30	area 31	area 32	area 33	area 34	area 35	area 36	area 37	area 38	area 39	area 40	area 41	area 42	area 43	area 44	area 45
mouse 1	NaN	0.0235099	-0.00483904	-0.0162037	-0.0926545	0.108526	0.133258	0.262823	0.00114416	NaN	-0.00897475	NaN	0.0203079	0.174587	0.319787	0.158868	-0.0339984	0.0597598	0.207823	0.193649	0.112115	0.0285714	NaN	NaN	0.0687964	0.0629108	0.0442039	0.10546	0.236844	0.351279	NaN	9.12597e-05	0.215226	0.0829595	-0.261341	-0.137827	-0.00798054	0.0165721	-0.0255958	0.0496596	0.1524	0.136926	0.186088	0.0178146	-0.132921
mouse 2	-0.878788	-0.0117125	-0.0162044	0.0280749	-0.0324733	0.119171	0.129862	0.0647993	NaN	NaN	-0.0118528	NaN	-0.0482759	0.143149	0.176143	0.148937	0.142055	0.129075	0.185887	0.216162	0.118812	0.047138	NaN	NaN	0.0703572	-0.08232	0.0416159	0.0810258	0.234836	0.279838	NaN	0.124933	0.23551	0.1226	-0.0246119	0.0162154	0.126468	0.0561852	0.00720616	0.258011	0.161653	0.283126	0.0697324	0.0695388	-0.0639869
mouse 3	NaN	0.0574445	0	0.287671	NaN	0.241667	0.10219	0.401515	NaN	NaN	-0.0689655	NaN	0.015873	0.116408	0.0588235	0.0175694	0.230627	0.241921	0.242424	0.263158	NaN	NaN	NaN	NaN	0.254237	0.0741743	0.137928	0.169427	0.316434	0.200844	NaN	0.258603	0.357238	0.183399	0.00576163	-0.0273243	0.133401	0.0312735	-0.0103132	0.27065	0.296737	0.354194	0.0418535	0.0102524	0.00937866
mouse 4	-0.333333	0.0254035	-0.0122794	-0.00615084	-0.0898496	0.0951126	-0.0977637	-0.0350942	0.0025974	NaN	0.0226925	NaN	-0.0340909	-0.10374	-0.017949	-0.0556558	-0.117568	0.0826016	0.28595	0.23489	-0.000861326	0.144338	NaN	NaN	0.122705	0.0490831	0.0253932	0.0874568	0.0991216	0.194849	NaN	0.108326	0.106221	0.17635	0.209134	0.196794	0.239535	0.0942565	0.000226918	-0.0638998	-0.0681906	0.0613079	-0.199395	-0.10634	-0.00153821
mouse 5	NaN	0.0405275	-0.0231613	-0.100102	0.0035951	0.133583	0.0473077	0.2711	0	NaN	-0.0188179	NaN	0.091982	-0.0325894	0.123909	-0.0404844	0.129494	0.0942321	0.345401	0.148086	0.0555556	-0.0526316	NaN	NaN	0.129072	0.0204176	-0.142385	0.0417623	0.199483	0.187344	NaN	0.15756	0.28386	0.385496	0.0680777	0.222336	0.193554	0.0825161	-0.0212848	0.25031	0.142918	0.207031	-0.103706	-0.122904	-0.140011
mouse 6	NaN	0.0128809	-0.00331873	0.00398551	-0.0211538	0.164099	0.0512003	0.157394	0	NaN	0.025641	NaN	-0.04	0.133638	-0.038961	0.0355791	0.0397701	0.101405	0.145013	0.147525	NaN	NaN	NaN	NaN	0.110977	0.0139785	0.146624	0.11401	0.127176	0.165961	NaN	0.0481808	0.185089	0.331171	0.0451163	0.129326	0.185642	0.0941769	0.00740023	0.164187	0.160612	0.275483	0.0592068	0.00312745	0.00285862
fILN ipsi
SSp-bfd
mouse 1	0.958637	0.977153	1	0.99811	1	0.920165	0.937107	0.808282	0.999252	0.990476	0.893805	1	0.946023	0.985641	0.896714	0.955202	0.548832	NaN	0.417266	0.671362	0.608384	0.622733	0.524223	0.762681	0.690271	0.863045	0.909091	0.894309	0.65	0.219512	0.276596	0.2	0.268657	0.518116	0.413793	0.6	0.88764	0.923077	1	0.768817	0.953488	0.878049	0.87812	0.993141	1
mouse 2	0.910448	0.983566	0.996078	0.985861	0.954887	0.868872	0.921827	0.811208	1	0.959302	0.947581	0.977049	0.889102	0.852916	0.850806	0.852636	0.524331	NaN	0.643604	0.632259	0.595121	0.53888	0.70987	0.934426	0.816212	0.881899	0.630728	0.634576	0.479134	0.305953	0.386868	0.332591	0.464476	0.65049	0.766608	0.856757	0.85875	0.90337	0.994198	0.482605	0.85757	0.750861	0.757143	0.752722	0.845123
mouse 3	1	0.962869	0.99733	0.962699	0.944724	0.885017	0.90812	0.783265	0.999334	0.978261	0.912863	0.992771	0.849057	0.902322	0.691525	0.852331	0.507646	NaN	0.602838	0.631549	0.600591	0.60189	0.720509	0.912713	0.749258	0.863392	0.579842	0.677892	0.620419	0.408469	0.31205	0.313636	0.513788	0.711446	0.74065	0.861826	0.923159	0.852179	0.969932	0.503027	0.747601	0.803594	0.72837	0.908251	0.966547
mouse 4	0.979798	0.981001	1	0.954497	0.938144	0.887226	0.916667	0.861913	1	1	NaN	1	0.944444	0.947368	0.923611	0.982624	0.451143	NaN	0.283706	0.023743	0.062088	0.158265	0.053679	0.00632911	0.465612	0.825553	0.549505	0.785714	0.569149	0.572165	0.0425743	0.0711167	0.320588	0.241092	0.875421	0.98722	0.87395	0.722222	0.8	0.597561	0.953125	0.890173	0.918033	0.954094	0.641327
mouse 5	0.992366	0.970015	0.982684	0.971957	0.948454	0.904762	0.882353	0.870249	0.99823	0.937853	0.969359	0.997067	0.999227	0.983955	0.91358	0.985592	0.505947	NaN	0.484189	0.54418	0.514294	0.362555	0.394303	0.877301	0.69659	0.818233	0.951351	0.870096	0.635389	0.206492	0.090085	0.320393	0.39905	0.469046	0.318417	0.598419	0.843137	0.895105	0.960622	0.499018	0.907621	0.877907	0.99895	0.984898	0.992233
mouse 6	0.831496	0.95773	0.994624	0.943653	0.932584	0.874677	0.924282	0.779514	0.992921	0.949622	0.862595	0.982993	0.87357	0.816523	0.738397	0.886019	0.535221	NaN	0.645186	0.62556	0.490357	0.524041	0.511431	0.736306	0.656326	0.854989	0.748828	0.74618	0.546075	0.368797	0.238777	0.242131	0.408734	0.620197	0.741718	0.846795	0.881018	0.885384	0.966903	0.495633	0.815331	0.751276	0.682195	0.83195	0.943505
fILN delta
SSp-bfd
mouse 1	0.0259779	0.0228471	NaN	0.00189036	NaN	0.0474164	0.0628931	0.0638108	-0.0102411	0.00952381	0.0830542	0	0.0508376	0.0116117	0.0925337	0.0438389	0.219928	NaN	0.341355	-0.103055	0.241884	0.0245157	0.0625319	0.225414	0.259613	0.115964	NaN	0.105691	NaN	NaN	0.473404	NaN	NaN	0.181884	NaN	0.185714	-0.094537	-0.25641	NaN	0.0436828	0.0465116	NaN	0.0784013	0.00685871	0
mouse 2	NaN	-0.0511815	0.00392157	-0.262177	-0.371554	0.0945831	0.0430849	0.0731852	-0.00847458	0.000697674	0.0348755	0.0229508	0.0514572	0.0448039	-0.112942	0.0999745	0.161108	NaN	0.033877	0.243407	0.307564	0.215329	-0.0509377	0.00675024	0.14565	0.0798027	0.250225	0.284343	0.520866	0.651312	0.51523	0.291931	0.49761	0.169707	0.0554255	-0.00363176	0.0976815	-0.0334275	-0.071868	0.242948	-0.0359838	0.219139	-0.0308859	-0.237858	0.0684372
mouse 3	0	-0.0733108	-0.00200267	0.006479	-0.00994101	0.0658425	0.0376635	0.127846	-0.00421227	0.0217391	-0.0182442	-0.00318775	0.0562808	0.0468146	0.114781	0.121998	0.148684	NaN	-0.0704214	-0.040995	-0.0180926	-0.2281	-0.449567	-0.139986	0.151212	0.0436983	0.121708	0.175869	0.300485	0.456647	0.6385	0.568351	0.466832	0.0483966	-0.0291119	-0.0323178	-0.10035	-0.282249	-0.342481	0.312016	0.138388	0.121276	0.17466	-0.205457	-0.0294269
mouse 4	0.020202	0.0129065	0	0.0411923	0.0426249	0.0676714	0.0833333	0.0586749	0	-0.0263158	NaN	0	0.0491861	0.0280365	0.0491162	0.0135322	0.239573	NaN	0.204715	0.307361	0.264042	-0.0567615	0.265458	0.731171	0.355965	0.147	0.345733	0.12817	0.366335	0.216297	0.598451	0.534147	0.623074	0.40308	-0.00875421	-0.163691	0.0337427	0.0634921	NaN	0.110404	-0.0573721	0.0481828	-0.0471206	-0.0467073	0.191075
mouse 5	-0.0294034	0.0226325	0.017316	0.0228343	0.0515464	0.0542399	0.0926471	-0.0229584	0.00176991	0.0288136	-0.0584282	-0.0104008	-0.0700076	-0.0648833	-0.0684777	-0.0266653	0.125509	NaN	0.105632	0.21455	0.348129	0.333931	0.51256	-0.127301	0.246268	0.138356	0.0153153	0.0624342	0.215851	0.48649	0.594698	0.00584832	0.141273	0.142383	0.102636	-0.223419	0.0727506	-0.0411723	-0.101647	0.126126	-0.0634654	0.0362561	-0.144178	-0.0231691	-0.0273207
mouse 6	0.168504	0.0119668	-0.0104967	0.0438779	0.000749064	0.0847139	0.0349017	0.0729451	0.00707881	0.00871117	0.0912198	0.0106977	0.124885	0.156254	0.171052	0.105995	0.167426	NaN	0.00470228	0.0685662	0.179874	0.00312884	0.0323192	0.174409	0.244131	0.105011	0.161698	0.186024	0.391425	0.597645	0.64552	0.525611	0.569876	0.135511	0.056035	-0.0784336	0.00520928	-0.268196	-0.155309	0.245108	0.027707	0.189319	0.182389	-0.0546028	-0.00907911
fILN ipsi
MOp
mouse 1	0.870785	0.974077	0.933333	0.985948	0.869565	0.852718	0.91195	0.766716	0.95148	0.936	0.958541	0.995362	0.88785	0.953998	0.821656	0.954111	0.6612	0.448452	0.645161	0.335188	0.458004	0.350064	0.499296	0.460142	NaN	0.700353	NaN	1	NaN	NaN	0.666667	0.25	NaN	0.578947	NaN	NaN	0.9	0.78	0.897436	0.756522	1	NaN	0.924829	0.998195	0.979592
mouse 2	0.906351	0.963554	1	0.984293	1	0.908982	0.976471	0.888579	0.976709	0.981481	0.877193	0.995204	0.875339	0.918288	0.830986	0.919708	0.679001	0.622071	0.871795	0.575064	0.476335	0.445644	0.625573	0.578256	NaN	0.756249	NaN	1	NaN	NaN	1	0.47619	NaN	0.833333	NaN	NaN	0.967742	0.963415	0.903614	0.772727	NaN	NaN	0.877551	0.995327	0.97561
mouse 3	0.8271	0.963203	1	0.978193	NaN	0.898712	0.925	0.896907	0.920327	0.884615	0.836066	0.996697	0.805415	0.947987	0.945312	0.976636	0.538403	0.354052	0.7	0.381215	0.427617	0.334335	0.386097	0.461038	NaN	0.646083	NaN	1	NaN	NaN	NaN	NaN	NaN	NaN	NaN	NaN	NaN	0.833333	0.888889	0.636364	0.8	NaN	0.951049	0.992701	0.984127
mouse 4	0.728015	0.971114	NaN	0.995665	NaN	0.882022	0.9	0.827586	0.969866	0.942308	0.848168	1	0.864407	0.893788	0.60274	0.873635	0.602803	0.544041	0.712644	0.513747	0.448965	0.266861	0.640038	0.287417	NaN	0.716191	1	1	NaN	NaN	NaN	NaN	NaN	0.592593	NaN	NaN	0.931034	0.977612	0.926471	0.333333	NaN	NaN	0.806452	1	0.939394
mouse 5	0.815394	0.938418	1	0.935528	0.98	0.886557	0.913043	0.860835	0.911	0.89697	0.923463	0.992308	0.866755	0.896309	0.82197	0.924822	0.619386	0.488847	0.718563	0.583974	0.519127	0.504621	0.558328	0.488038	NaN	0.680667	1	0.964912	NaN	0.777778	0.428571	0.5	NaN	0.578947	NaN	NaN	0.963918	0.959596	0.892857	0.590909	0.870968	NaN	0.789298	0.998686	0.988636
mouse 6	0.777273	0.986646	1	0.993258	0.987448	0.915155	0.985367	0.681172	0.992032	0.966667	0.855263	0.995508	0.880824	0.901814	0.75	0.928401	0.61692	0.595164	0.704433	0.525269	0.48114	0.430298	0.614335	0.639494	NaN	0.705124	1	0.960784	NaN	1	0.75	0.666667	NaN	0.710938	NaN	NaN	0.935484	0.977778	0.965986	0.843575	0.926829	NaN	0.903279	0.996296	0.901515
fILN delta
MOp
mouse 1	0.0849677	0.00833508	NaN	0.0100193	NaN	0.104271	0.0880503	0.201369	0.0416864	0.0345882	0.0350181	-0.00491646	0.110351	0.0460022	0.13044	0.0424408	0.233134	0.460639	0.354839	0.0908471	0.109342	0.253709	0.437324	0.409777	NaN	0.178609	NaN	0	NaN	NaN	0.333333	NaN	NaN	NaN	NaN	NaN	NaN	0.22	-0.00854701	NaN	NaN	NaN	-0.0676863	0.00180505	-0.312925
mouse 2	0.0936491	0.027244	NaN	0.00260637	NaN	0.0380545	0.00269608	0.0987624	0.014689	0.0185185	0.115288	-0.0164804	0.119136	0.0817121	0.10344	0.0746262	0.263527	0.303855	NaN	0.0249364	0.301443	0.209529	0.311927	0.311744	NaN	0.113177	NaN	NaN	NaN	NaN	0	NaN	NaN	NaN	NaN	NaN	NaN	0.0365854	0.0963855	NaN	NaN	NaN	0.122449	0.0046729	NaN
mouse 3	0.167053	0.0198474	NaN	0.0218069	NaN	0.0373987	NaN	-0.0844072	0.0631268	0.115385	0.0781739	0.00330251	0.186057	0.0520134	-0.0430569	0.0196948	0.377239	0.593316	NaN	0.0215623	-0.00377911	0.171994	0.486919	0.437218	NaN	0.249116	NaN	0	NaN	NaN	NaN	NaN	NaN	NaN	NaN	NaN	NaN	0.166667	0.111111	NaN	NaN	NaN	NaN	0.00729927	0.015873
mouse 4	0.257801	0.00574332	NaN	-0.00576575	NaN	0.0892301	0.1	0.161544	0.0118691	NaN	0.123531	0	0.135593	0.106212	0.39726	0.126365	0.315507	-0.0924285	NaN	0.336253	0.150919	0.142422	-0.336466	0.400656	NaN	0.180371	NaN	0	NaN	NaN	NaN	NaN	NaN	NaN	NaN	NaN	0.0689655	0.0223881	-0.304849	NaN	NaN	NaN	NaN	0	0.0606061
mouse 5	0.159225	0.00971431	NaN	0.0421394	NaN	0.0584463	-0.396914	0.119165	0.0686124	0.0685475	0.0659213	8.7745e-05	0.131362	0.103691	0.17197	0.0706567	0.330286	0.35429	0.181437	0.234207	0.0935982	0.0787123	0.136117	0.242985	NaN	0.134796	0	0.0350877	NaN	NaN	0.571429	NaN	NaN	NaN	NaN	NaN	0.0360825	0.040404	0.0238095	NaN	NaN	NaN	0.210702	0.00131406	0.0113636
mouse 6	0.149149	-0.0214722	NaN	0.00344181	NaN	0.0531796	-0.0136691	0.126416	0.0059601	NaN	0.108313	0.00449236	0.115991	0.0981857	0.195455	0.0263374	0.341334	0.37952	0.14172	0.162231	0.334265	0.461006	0.282217	0.166174	NaN	-0.117426	0	-0.0322129	NaN	NaN	-0.75	NaN	NaN	NaN	NaN	NaN	-0.0604839	0.0222222	NaN	NaN	NaN	NaN	0.0967213	-0.0037037	-0.578935

## Sheet: Fig4F
fILN ipsi
VISp	area 1	area 2	area 3	area 4	area 5	area 6	area 7	area 8	area 9	area 10	area 11	area 12	area 13	area 14	area 15	area 16	area 17	area 18	area 19	area 20	area 21	area 22	area 23	area 24	area 25	area 26	area 27	area 28	area 29	area 30	area 31	area 32	area 33	area 34	area 35	area 36	area 37	area 38	area 39	area 40	area 41	area 42	area 43	area 44	area 45
mouse 1	0.857143	0.956623	0.993211	0.979167	0.95203	0.720302	0.827907	0.438858	0.998856	1	0.982659	1	0.950495	0.739104	0.289737	0.760528	0.736264	0.765998	0.705882	0.726351	0.867052	0.971429	1	1	0.90641	0.896648	0.752569	0.631197	0.531711	0.467002	NaN	0.719725	0.518146	0.66192	0.82591	0.852469	0.841385	0.836037	0.978208	0.566276	0.538108	0.583692	0.706989	0.763827	0.912631
mouse 2	0.878788	0.965416	0.997193	0.971925	0.907473	0.707495	0.795511	0.58194	0.998198	0.97093	0.942408	1	1	0.709092	0.212631	0.594991	0.728831	0.73588	0.718327	0.758197	0.881188	0.907407	1	1	0.876663	0.920092	0.888526	0.676525	0.590364	0.47789	NaN	0.681716	0.476182	0.639044	0.68362	0.77203	0.801699	0.846136	0.962794	0.493289	0.61563	0.505616	0.755059	0.561568	0.993645
mouse 3	NaN	0.926426	1	0.712329	1	0.466667	0.89781	0.306818	1	0.97561	1	1	0.984127	0.773263	0.941176	0.978982	0.73301	0.728953	0.666667	0.736842	0.9	0.833333	NaN	NaN	0.745763	0.868354	0.850804	0.783338	0.506737	0.500827	NaN	0.615058	0.491446	0.616601	0.682918	0.755801	0.860539	0.929253	0.994565	0.466192	0.642287	0.447608	0.958146	0.989748	0.990621
mouse 4	1	0.957205	0.992009	0.953519	0.93985	0.772812	0.926335	0.780656	0.997403	0.949275	0.896226	1	1	0.831854	0.410214	0.915704	0.578095	0.594365	0.615148	0.711538	0.852713	0.80303	1	1	0.836645	0.892093	0.951815	0.740068	0.598003	0.497337	NaN	0.526846	0.456913	0.557844	0.431025	0.58882	0.727066	0.868777	0.991676	0.451693	0.512884	0.475125	0.912505	0.728856	0.998648
mouse 5	0.71875	0.931132	0.997738	0.957245	0.903382	0.837432	0.827692	0.696113	1	0.991453	0.897196	0.989796	0.89	0.676365	0.264151	0.751869	0.690506	0.796598	0.610482	0.770833	0.944444	1	1	1	0.861027	0.892461	0.878844	0.626364	0.516984	0.465521	NaN	0.601602	0.446674	0.532577	0.608486	0.663556	0.728456	0.796605	0.978294	0.487893	0.551338	0.474493	0.737877	0.698079	0.932572
mouse 6	NaN	0.971119	0.996422	0.971014	0.971154	0.613678	0.879032	0.462075	1	0.963415	0.974359	1	1	0.70281	0.857143	0.864566	0.92	0.868177	0.797844	0.752475	0.942529	0.97561	1	1	0.851986	0.9	0.699737	0.68201	0.64961	0.640381	NaN	0.896989	0.709485	0.649598	0.731862	0.805411	0.729113	0.847709	0.987202	0.73301	0.687764	0.558501	0.827098	0.984968	0.990605
SSp-bfd
mouse 1	0.958637	0.977153	1	0.99811	1	0.920165	0.937107	0.808282	0.999252	0.990476	0.893805	1	0.946023	0.985641	0.896714	0.955202	0.548832	NaN	0.417266	0.671362	0.608384	0.622733	0.524223	0.762681	0.690271	0.863045	0.909091	0.894309	0.65	0.219512	0.276596	0.2	0.268657	0.518116	0.413793	0.6	0.88764	0.923077	1	0.768817	0.953488	0.878049	0.87812	0.993141	1
mouse 2	0.910448	0.983566	0.996078	0.985861	0.954887	0.868872	0.921827	0.811208	1	0.959302	0.947581	0.977049	0.889102	0.852916	0.850806	0.852636	0.524331	NaN	0.643604	0.632259	0.595121	0.53888	0.70987	0.934426	0.816212	0.881899	0.630728	0.634576	0.479134	0.305953	0.386868	0.332591	0.464476	0.65049	0.766608	0.856757	0.85875	0.90337	0.994198	0.482605	0.85757	0.750861	0.757143	0.752722	0.845123
mouse 3	1	0.962869	0.99733	0.962699	0.944724	0.885017	0.90812	0.783265	0.999334	0.978261	0.912863	0.992771	0.849057	0.902322	0.691525	0.852331	0.507646	NaN	0.602838	0.631549	0.600591	0.60189	0.720509	0.912713	0.749258	0.863392	0.579842	0.677892	0.620419	0.408469	0.31205	0.313636	0.513788	0.711446	0.74065	0.861826	0.923159	0.852179	0.969932	0.503027	0.747601	0.803594	0.72837	0.908251	0.966547
mouse 4	0.979798	0.981001	1	0.954497	0.938144	0.887226	0.916667	0.861913	1	1	NaN	1	0.944444	0.947368	0.923611	0.982624	0.451143	NaN	0.283706	0.023743	0.062088	0.158265	0.053679	0.00632911	0.465612	0.825553	0.549505	0.785714	0.569149	0.572165	0.0425743	0.0711167	0.320588	0.241092	0.875421	0.98722	0.87395	0.722222	0.8	0.597561	0.953125	0.890173	0.918033	0.954094	0.641327
mouse 5	0.992366	0.970015	0.982684	0.971957	0.948454	0.904762	0.882353	0.870249	0.99823	0.937853	0.969359	0.997067	0.999227	0.983955	0.91358	0.985592	0.505947	NaN	0.484189	0.54418	0.514294	0.362555	0.394303	0.877301	0.69659	0.818233	0.951351	0.870096	0.635389	0.206492	0.090085	0.320393	0.39905	0.469046	0.318417	0.598419	0.843137	0.895105	0.960622	0.499018	0.907621	0.877907	0.99895	0.984898	0.992233
mouse 6	0.831496	0.95773	0.994624	0.943653	0.932584	0.874677	0.924282	0.779514	0.992921	0.949622	0.862595	0.982993	0.87357	0.816523	0.738397	0.886019	0.535221	NaN	0.645186	0.62556	0.490357	0.524041	0.511431	0.736306	0.656326	0.854989	0.748828	0.74618	0.546075	0.368797	0.238777	0.242131	0.408734	0.620197	0.741718	0.846795	0.881018	0.885384	0.966903	0.495633	0.815331	0.751276	0.682195	0.83195	0.943505
MOp-bfd
mouse 1	0.870785	0.974077	0.933333	0.985948	0.869565	0.852718	0.91195	0.766716	0.95148	0.936	0.958541	0.995362	0.88785	0.953998	0.821656	0.954111	0.6612	0.448452	0.645161	0.335188	0.458004	0.350064	0.499296	0.460142	NaN	0.700353	NaN	1	NaN	NaN	0.666667	0.25	NaN	0.578947	NaN	NaN	0.9	0.78	0.897436	0.756522	1	NaN	0.924829	0.998195	0.979592
mouse 2	0.906351	0.963554	1	0.984293	1	0.908982	0.976471	0.888579	0.976709	0.981481	0.877193	0.995204	0.875339	0.918288	0.830986	0.919708	0.679001	0.622071	0.871795	0.575064	0.476335	0.445644	0.625573	0.578256	NaN	0.756249	NaN	1	NaN	NaN	1	0.47619	NaN	0.833333	NaN	NaN	0.967742	0.963415	0.903614	0.772727	NaN	NaN	0.877551	0.995327	0.97561
mouse 3	0.8271	0.963203	1	0.978193	NaN	0.898712	0.925	0.896907	0.920327	0.884615	0.836066	0.996697	0.805415	0.947987	0.945312	0.976636	0.538403	0.354052	0.7	0.381215	0.427617	0.334335	0.386097	0.461038	NaN	0.646083	NaN	1	NaN	NaN	NaN	NaN	NaN	NaN	NaN	NaN	NaN	0.833333	0.888889	0.636364	0.8	NaN	0.951049	0.992701	0.984127
mouse 4	0.728015	0.971114	NaN	0.995665	NaN	0.882022	0.9	0.827586	0.969866	0.942308	0.848168	1	0.864407	0.893788	0.60274	0.873635	0.602803	0.544041	0.712644	0.513747	0.448965	0.266861	0.640038	0.287417	NaN	0.716191	1	1	NaN	NaN	NaN	NaN	NaN	0.592593	NaN	NaN	0.931034	0.977612	0.926471	0.333333	NaN	NaN	0.806452	1	0.939394
mouse 5	0.815394	0.938418	1	0.935528	0.98	0.886557	0.913043	0.860835	0.911	0.89697	0.923463	0.992308	0.866755	0.896309	0.82197	0.924822	0.619386	0.488847	0.718563	0.583974	0.519127	0.504621	0.558328	0.488038	NaN	0.680667	1	0.964912	NaN	0.777778	0.428571	0.5	NaN	0.578947	NaN	NaN	0.963918	0.959596	0.892857	0.590909	0.870968	NaN	0.789298	0.998686	0.988636
mouse 6	0.777273	0.986646	1	0.993258	0.987448	0.915155	0.985367	0.681172	0.992032	0.966667	0.855263	0.995508	0.880824	0.901814	0.75	0.928401	0.61692	0.595164	0.704433	0.525269	0.48114	0.430298	0.614335	0.639494	NaN	0.705124	1	0.960784	NaN	1	0.75	0.666667	NaN	0.710938	NaN	NaN	0.935484	0.977778	0.965986	0.843575	0.926829	NaN	0.903279	0.996296	0.901515
fILN contra	area 1	area 2	area 3	area 4	area 5	area 6	area 7	area 8	area 9	area 10	area 11	area 12	area 13	area 14	area 15	area 16	area 17	area 18	area 19	area 20	area 21	area 22	area 23	area 24	area 25	area 26	area 27	area 28	area 29	area 30	area 31	area 32	area 33	area 34	area 35	area 36	area 37	area 38	area 39	area 40	area 41	area 42	area 43	area 44	area 45
mouse 1	NaN	0.980132	0.988372	0.962963	0.859375	0.828829	0.961165	0.701681	1	NaN	0.973684	NaN	0.970803	0.91369	0.609524	0.919395	0.702265	0.825758	0.913706	0.92	0.979167	1	NaN	NaN	0.975207	0.959559	0.796773	0.736657	0.768555	0.818281	0.786683	0.719816	0.733372	0.744879	0.56457	0.714642	0.833405	0.852609	0.952612	0.615936	0.690508	0.720618	0.893077	0.781641	0.77971
mouse 2	0	0.953704	0.980989	1	0.875	0.826667	0.925373	0.646739	NaN	NaN	0.930556	NaN	0.951724	0.852241	0.388773	0.743928	0.870886	0.864955	0.904215	0.974359	1	0.954545	NaN	NaN	0.94702	0.837772	0.930142	0.75755	0.8252	0.757728	0.859325	0.806649	0.711691	0.761644	0.659008	0.788245	0.928167	0.902321	0.97	0.7513	0.777283	0.788741	0.824791	0.631107	0.929658
mouse 3	NaN	0.983871	1	1	NaN	0.708333	1	0.708333	NaN	NaN	0.931034	NaN	1	0.889671	1	0.996552	0.963636	0.970874	0.909091	1	NaN	NaN	NaN	NaN	1	0.942529	0.988732	0.952765	0.823171	0.701671	0.82367	0.873662	0.848684	0.8	0.688679	0.728477	0.993939	0.960526	0.984252	0.736842	0.939024	0.801802	1	1	1
mouse 4	0.666667	0.982609	0.97973	0.947368	0.85	0.867925	0.828571	0.745562	1	NaN	0.918919	NaN	0.965909	0.728114	0.392265	0.860048	0.460526	0.676966	0.901099	0.946429	0.851852	0.947368	NaN	NaN	0.95935	0.941176	0.977208	0.827525	0.697125	0.692186	0.657999	0.635172	0.563134	0.734194	0.640159	0.785614	0.966601	0.963033	0.991903	0.387793	0.444694	0.536433	0.713109	0.622517	0.99711
mouse 5	NaN	0.97166	0.974576	0.857143	0.906977	0.971014	0.875	0.967213	1	NaN	0.878378	NaN	0.981982	0.643776	0.38806	0.711385	0.82	0.89083	0.955882	0.918919	1	0.947368	NaN	NaN	0.990099	0.912879	0.73646	0.668127	0.716467	0.652865	0.718225	0.759162	0.730534	0.918072	0.676564	0.885892	0.92201	0.879121	0.957009	0.738204	0.694256	0.681524	0.634171	0.575175	0.792561
mouse 6	0.0232558	0.984	0.993103	0.975	0.95	0.777778	0.930233	0.619469	1	NaN	1	NaN	0.96	0.836449	0.818182	0.900145	0.95977	0.969582	0.942857	0.9	NaN	NaN	NaN	NaN	0.962963	0.913978	0.846361	0.79602	0.776786	0.806343	0.891786	0.94517	0.894574	0.980769	0.776978	0.934737	0.914754	0.941886	0.994602	0.897196	0.848375	0.833984	0.886305	0.988095	0.993464
mouse 1	0.984615	1	NaN	1	NaN	0.967581	1	0.872093	0.989011	1	0.97686	1	0.99686	0.997253	0.989247	0.999041	0.768761	0.546736	0.758621	0.568306	0.850267	0.647249	0.586755	0.988095	0.949884	0.979009	NaN	1	NaN	NaN	0.75	NaN	NaN	0.7	NaN	0.785714	0.793103	0.666667	NaN	0.8125	1	NaN	0.956522	1	1
mouse 2	NaN	0.932384	1	0.723684	0.583333	0.963455	0.964912	0.884393	0.991525	0.96	0.982456	1	0.940559	0.89772	0.737864	0.95261	0.685439	0.563517	0.677481	0.875666	0.902685	0.754209	0.658933	0.941176	0.961862	0.961702	0.880952	0.918919	1	0.957265	0.902098	0.624521	0.962085	0.820197	0.822034	0.853125	0.956432	0.869942	0.92233	0.725552	0.821586	0.97	0.726257	0.514863	0.913561
mouse 3	1	0.889558	0.995327	0.969178	0.934783	0.95086	0.945783	0.911111	0.995122	1	0.894619	0.989583	0.905337	0.949137	0.806306	0.974328	0.65633	0.318246	0.532417	0.590554	0.582499	0.37379	0.270942	0.772727	0.90047	0.90709	0.70155	0.85376	0.920904	0.865116	0.950549	0.881988	0.98062	0.759843	0.711538	0.829508	0.822809	0.56993	0.627451	0.815043	0.885989	0.92487	0.90303	0.702793	0.93712
mouse 4	1	0.993908	1	0.99569	0.980769	0.954897	1	0.920588	1	0.973684	0.944304	1	0.993631	0.975405	0.972727	0.996156	0.690715	0.329322	0.488421	0.331104	0.32613	0.101504	0.319137	0.7375	0.821577	0.972553	0.895238	0.913884	0.935484	0.788462	0.641026	0.605263	0.943662	0.644172	0.866667	0.823529	0.907692	0.785714	NaN	0.707965	0.895753	0.938356	0.870912	0.907387	0.832402
mouse 5	0.962963	0.992647	1	0.994792	1	0.959002	0.975	0.847291	1	0.966667	0.910931	0.986667	0.92922	0.919072	0.845103	0.958927	0.631456	0.457765	0.58982	0.75873	0.862423	0.696486	0.906863	0.75	0.942857	0.956589	0.966667	0.93253	0.85124	0.692982	0.684783	0.326241	0.540323	0.611429	0.421053	0.375	0.915888	0.853933	0.858974	0.625144	0.844156	0.914163	0.854772	0.961728	0.964912
mouse 6	1	0.969697	0.984127	0.987531	0.933333	0.959391	0.959184	0.852459	1	0.958333	0.953815	0.993691	0.998454	0.972777	0.909449	0.992014	0.702647	0.329101	0.649888	0.694126	0.670232	0.52717	0.54375	0.910714	0.900457	0.96	0.910526	0.932203	0.9375	0.966443	0.884298	0.767742	0.97861	0.755708	0.797753	0.768362	0.886228	0.617188	0.811594	0.740741	0.843038	0.940594	0.864583	0.777347	0.934426
mouse 1	0.955752	0.982412	NaN	0.995968	NaN	0.956989	1	0.968085	0.993166	0.970588	0.993559	0.990446	0.998201	1	0.952096	0.996552	0.894334	0.909091	1	0.426036	0.567345	0.603774	0.93662	0.869919	0.63072	0.878963	NaN	1	NaN	NaN	1	NaN	NaN	NaN	NaN	NaN	NaN	1	0.888889	NaN	NaN	NaN	0.857143	1	0.666667
mouse 2	1	0.990798	NaN	0.9869	NaN	0.947037	0.979167	0.987342	0.991398	1	0.992481	0.978723	0.994475	1	0.934426	0.994334	0.942529	0.925926	NaN	0.6	0.777778	0.655172	0.9375	0.89	0.687849	0.869426	NaN	NaN	NaN	NaN	1	NaN	NaN	NaN	NaN	NaN	NaN	1	1	NaN	NaN	NaN	1	1	NaN
mouse 3	0.994152	0.983051	NaN	1	NaN	0.936111	NaN	0.8125	0.983454	1	0.914239	1	0.991471	1	0.902256	0.99633	0.915641	0.947368	NaN	0.402778	0.423838	0.506329	0.873016	0.898256	0.654946	0.895199	NaN	1	NaN	NaN	NaN	NaN	NaN	NaN	NaN	NaN	1	1	1	NaN	NaN	NaN	NaN	1	1
mouse 4	0.985816	0.976857	NaN	0.989899	NaN	0.971253	1	0.98913	0.981735	NaN	0.971698	1	1	1	1	1	0.91831	0.451613	NaN	0.85	0.599884	0.409283	0.303571	0.688073	0.632427	0.896562	NaN	1	NaN	NaN	1	NaN	NaN	NaN	NaN	NaN	1	1	0.621622	NaN	NaN	NaN	NaN	1	1
mouse 5	0.974619	0.948133	NaN	0.977667	NaN	0.945003	0.516129	0.98	0.979613	0.965517	0.989384	0.992395	0.998117	1	0.993939	0.995479	0.949672	0.843137	0.9	0.818182	0.612725	0.583333	0.694444	0.731023	0.630179	0.815462	1	1	NaN	NaN	1	NaN	NaN	NaN	NaN	NaN	1	1	0.916667	NaN	NaN	NaN	1	1	1
mouse 6	0.926421	0.965174	NaN	0.9967	NaN	0.968335	0.971698	0.807588	0.997992	NaN	0.963576	1	0.996815	1	0.945455	0.954738	0.958254	0.974684	0.846154	0.6875	0.815405	0.891304	0.896552	0.805668	0.669483	0.587697	1	0.928571	NaN	NaN	0	NaN	NaN	NaN	NaN	NaN	0.875	1	NaN	NaN	NaN	NaN	1	0.992593	0.322581

## Sheet: Fig4G
VISp mean fILN				SSp-bfd mean fILN				MOp mean fILN
	ipsi	contra			ipsi	contra			ipsi	contra
area 1	0.86367	0.229974		area 1	0.945458	0.989516		area 1	0.820819	0.972793
area 2	0.95132	0.975996		area 2	0.972056	0.963032		area 2	0.966169	0.974404
area 3	0.996095	0.986128		area 3	0.995119	0.995891		area 3	0.986667	NaN
area 4	0.9242	0.957079		area 4	0.969463	0.945146		area 4	0.978814	0.991189
area 5	0.945648	0.88827		area 5	0.953132	0.886444		area 5	0.959253	NaN
area 6	0.686398	0.830091		area 6	0.89012	0.959198		area 6	0.890691	0.954121
area 7	0.859048	0.920057		area 7	0.915059	0.974147		area 7	0.935305	0.893399
area 8	0.54441	0.7315		area 8	0.819072	0.881323		area 8	0.820299	0.924108
area 9	0.999076	1		area 9	0.99829	0.995943		area 9	0.953569	0.987893
area 10	0.975114	NaN		area 10	0.969252	0.976447		area 10	0.934673	0.984026
area 11	0.948808	0.938762		area 11	0.917241	0.943831		area 11	0.883115	0.970823
area 12	0.998299	NaN		area 12	0.991647	0.99499		area 12	0.995846	0.993594
area 13	0.97077	0.971736		area 13	0.916904	0.960677		area 13	0.863432	0.996513
area 14	0.738748	0.810657		area 14	0.914788	0.951894		area 14	0.918697	1
area 15	0.495842	0.599467		area 15	0.835772	0.876783		area 15	0.795444	0.954695
area 16	0.811107	0.855242		area 16	0.919067	0.978846		area 16	0.929552	0.989572
area 17	0.731117	0.796181		area 17	0.512187	0.689225		area 17	0.619619	0.92979
area 18	0.748328	0.866494		area 18	NaN	0.424114		area 18	0.508771	0.84197
area 19	0.685725	0.921142		area 19	0.512798	0.616108		area 19	0.725433	0.915385
area 20	0.742706	0.943284		area 20	0.521442	0.636414		area 20	0.485743	0.630749
area 21	0.897988	0.957755		area 21	0.478473	0.699039		area 21	0.468531	0.632829
area 22	0.915135	0.962321		area 22	0.468061	0.516734		area 22	0.388637	0.608199
area 23	1	NaN		area 23	0.485669	0.54773		area 23	0.553944	0.773617
area 24	1	NaN		area 24	0.704959	0.850036		area 24	0.485731	0.813823
area 25	0.846415	0.97244		area 25	0.679045	0.912851		area 25	NaN	0.650934
area 26	0.894942	0.917982		area 26	0.851185	0.956157		area 26	0.700778	0.823885
area 27	0.837049	0.879279		area 27	0.728224	0.870987		area 27	1	1
area 28	0.689917	0.789774		area 28	0.768128	0.925216		area 28	0.987616	0.985714
area 29	0.565568	0.767884		area 29	0.583361	0.929025		area 29	NaN	NaN
area 30	0.50816	0.738179		area 30	0.346898	0.854054		area 30	0.888889	NaN
area 31	NaN	0.789615		area 31	0.224492	0.802126		area 31	0.71131	0.8
area 32	0.673656	0.789938		area 32	0.246645	0.641151		area 32	0.473214	NaN
area 33	0.516474	0.746998		area 33	0.395882	0.88106		area 33	NaN	NaN
area 34	0.609597	0.82326		area 34	0.535064	0.715225		area 34	0.658952	NaN
area 35	0.660637	0.66766		area 35	0.642768	0.723809		area 35	NaN	NaN
area 36	0.739681	0.806268		area 36	0.791836	0.739206		area 36	NaN	NaN
area 37	0.781376	0.92648		area 37	0.877942	0.880359		area 37	0.939636	0.96875
area 38	0.854086	0.916583		area 38	0.863556	0.727229		area 38	0.915289	1
area 39	0.982123	0.975063		area 39	0.948609	0.805087		area 39	0.912542	0.885435
area 40	0.533059	0.687879		area 40	0.557777	0.737824		area 40	0.655572	NaN
area 41	0.591335	0.732357		area 41	0.872456	0.881754		area 41	0.899449	NaN
area 42	0.507506	0.727184		area 42	0.82531	0.937597		area 42	NaN	NaN
area 43	0.816279	0.825242		area 43	0.827135	0.862679		area 43	0.87541	0.964286
area 44	0.787841	0.766422		area 44	0.904176	0.810686		area 44	0.996868	0.998765
area 45	0.969787	0.915417		area 45	0.898123	0.930404		area 45	0.961479	0.797849
