# Supplementary material for: Layer 6 corticocortical neurons are a major route for intra- and interhemispheric feedback
Source: eLife. 2025 Mar 28;13:RP100478. doi: 10.7554/eLife.100478 (PMC11952746; doi:10.7554/eLife.100478)
Supplement: Figure 5—source data 1. [file elife-100478-fig5-data1.xlsx]

## Sheet: Fig5A
Mean fILN per module
	ipsi	contra
Pfron	0.8997	0.9156
Lateral	0.9064	0.9312
Medial	0.8958	0.9003
SoMo	0.6634	0.7689
Vis	0.6063	0.7984
Aud	0.7155	0.8042

## Sheet: Fig5B
ipsi v-a-sm
	area 1	area 2	area 3	area 4	area 5	area 6	area 7	area 8	area 9	area 10	area 11	area 12	area 13	area 14	area 15	area 16	area 17	area 18	area 19	area 20	area 21	area 22	area 23	area 24
mouse 1	0.736264	0.765998	0.705882	0.726351	0.867052	0.971429	1	1	0.90641	0.896648	0.752569	0.631197	0.531711	0.467002	NaN	0.719725	0.518146	0.66192	0.82591	0.852469	0.566276	0.538108	0.583692	0.706989
mouse 2	0.728831	0.73588	0.718327	0.758197	0.881188	0.907407	1	1	0.876663	0.920092	0.888526	0.676525	0.590364	0.47789	NaN	0.681716	0.476182	0.639044	0.68362	0.77203	0.493289	0.61563	0.505616	0.755059
mouse 3	0.73301	0.728953	0.666667	0.736842	0.9	0.833333	NaN	NaN	0.745763	0.868354	0.850804	0.783338	0.506737	0.500827	NaN	0.615058	0.491446	0.616601	0.682918	0.755801	0.466192	0.642287	0.447608	0.958146
mouse 4	0.578095	0.594365	0.615148	0.711538	0.852713	0.80303	1	1	0.836645	0.892093	0.951815	0.740068	0.598003	0.497337	NaN	0.526846	0.456913	0.557844	0.431025	0.58882	0.451693	0.512884	0.475125	0.912505
mouse 5	0.690506	0.796598	0.610482	0.770833	0.944444	1	1	1	0.861027	0.892461	0.878844	0.626364	0.516984	0.465521	NaN	0.601602	0.446674	0.532577	0.608486	0.663556	0.487893	0.551338	0.474493	0.737877
mouse 6	0.92	0.868177	0.797844	0.752475	0.942529	0.97561	1	1	0.851986	0.9	0.699737	0.68201	0.64961	0.640381	NaN	0.896989	0.709485	0.649598	0.731862	0.805411	0.73301	0.687764	0.558501	0.827098
mouse 7	0.548832	NaN	0.417266	0.671362	0.608384	0.622733	0.524223	0.762681	0.690271	0.863045	0.909091	0.894309	0.65	0.219512	0.276596	0.2	0.268657	0.518116	0.413793	0.6	0.768817	0.953488	0.878049	0.87812
mouse 8	0.524331	NaN	0.643604	0.632259	0.595121	0.53888	0.70987	0.934426	0.816212	0.881899	0.630728	0.634576	0.479134	0.305953	0.386868	0.332591	0.464476	0.65049	0.766608	0.856757	0.482605	0.85757	0.750861	0.757143
mouse 9	0.507646	NaN	0.602838	0.631549	0.600591	0.60189	0.720509	0.912713	0.749258	0.863392	0.579842	0.677892	0.620419	0.408469	0.31205	0.313636	0.513788	0.711446	0.74065	0.861826	0.503027	0.747601	0.803594	0.72837
mouse 10	0.451143	NaN	0.283706	0.023743	0.062088	0.158265	0.053679	0.00632911	0.465612	0.825553	0.549505	0.785714	0.569149	0.572165	0.0425743	0.0711167	0.320588	0.241092	0.875421	0.98722	0.597561	0.953125	0.890173	0.918033
mouse 11	0.505947	NaN	0.484189	0.54418	0.514294	0.362555	0.394303	0.877301	0.69659	0.818233	0.951351	0.870096	0.635389	0.206492	0.090085	0.320393	0.39905	0.469046	0.318417	0.598419	0.499018	0.907621	0.877907	0.99895
mouse 12	0.535221	NaN	0.645186	0.62556	0.490357	0.524041	0.511431	0.736306	0.656326	0.854989	0.748828	0.74618	0.546075	0.368797	0.238777	0.242131	0.408734	0.620197	0.741718	0.846795	0.495633	0.815331	0.751276	0.682195
mouse 13	0.6612	0.448452	0.645161	0.335188	0.458004	0.350064	0.499296	0.460142	NaN	0.700353	NaN	1	NaN	NaN	0.666667	0.25	NaN	0.578947	NaN	NaN	0.756522	1	NaN	0.924829
mouse 14	0.679001	0.622071	0.871795	0.575064	0.476335	0.445644	0.625573	0.578256	NaN	0.756249	NaN	1	NaN	NaN	1	0.47619	NaN	0.833333	NaN	NaN	0.772727	NaN	NaN	0.877551
mouse 15	0.538403	0.354052	0.7	0.381215	0.427617	0.334335	0.386097	0.461038	NaN	0.646083	NaN	1	NaN	NaN	NaN	NaN	NaN	NaN	NaN	NaN	0.636364	0.8	NaN	0.951049
mouse 16	0.602803	0.544041	0.712644	0.513747	0.448965	0.266861	0.640038	0.287417	NaN	0.716191	1	1	NaN	NaN	NaN	NaN	NaN	0.592593	NaN	NaN	0.333333	NaN	NaN	0.806452
mouse 17	0.619386	0.488847	0.718563	0.583974	0.519127	0.504621	0.558328	0.488038	NaN	0.680667	1	0.964912	NaN	0.777778	0.428571	0.5	NaN	0.578947	NaN	NaN	0.590909	0.870968	NaN	0.789298
mouse 18	0.61692	0.595164	0.704433	0.525269	0.48114	0.430298	0.614335	0.639494	NaN	0.705124	1	0.960784	NaN	1	0.75	0.666667	NaN	0.710938	NaN	NaN	0.843575	0.926829	NaN	0.903279
contra v-a-sm
	area 1	area 2	area 3	area 4	area 5	area 6	area 7	area 8	area 9	area 10	area 11	area 12	area 13	area 14	area 15	area 16	area 17	area 18	area 19	area 20	area 21	area 22	area 23	area 24
mouse 1	0.702265	0.825758	0.913706	0.92	0.979167	1	NaN	NaN	0.975207	0.959559	0.796773	0.736657	0.768555	0.818281	0.786683	0.719816	0.733372	0.744879	0.56457	0.714642	0.615936	0.690508	0.720618	0.893077
mouse 2	0.870886	0.864955	0.904215	0.974359	1	0.954545	NaN	NaN	0.94702	0.837772	0.930142	0.75755	0.8252	0.757728	0.859325	0.806649	0.711691	0.761644	0.659008	0.788245	0.7513	0.777283	0.788741	0.824791
mouse 3	0.963636	0.970874	0.909091	1	NaN	NaN	NaN	NaN	1	0.942529	0.988732	0.952765	0.823171	0.701671	0.82367	0.873662	0.848684	0.8	0.688679	0.728477	0.736842	0.939024	0.801802	1
mouse 4	0.460526	0.676966	0.901099	0.946429	0.851852	0.947368	NaN	NaN	0.95935	0.941176	0.977208	0.827525	0.697125	0.692186	0.657999	0.635172	0.563134	0.734194	0.640159	0.785614	0.387793	0.444694	0.536433	0.713109
mouse 5	0.82	0.89083	0.955882	0.918919	1	0.947368	NaN	NaN	0.990099	0.912879	0.73646	0.668127	0.716467	0.652865	0.718225	0.759162	0.730534	0.918072	0.676564	0.885892	0.738204	0.694256	0.681524	0.634171
mouse 6	0.95977	0.969582	0.942857	0.9	NaN	NaN	NaN	NaN	0.962963	0.913978	0.846361	0.79602	0.776786	0.806343	0.891786	0.94517	0.894574	0.980769	0.776978	0.934737	0.897196	0.848375	0.833984	0.886305
mouse 7	0.768761	0.546736	0.758621	0.568306	0.850267	0.647249	0.586755	0.988095	0.949884	0.979009	NaN	1	NaN	NaN	0.75	NaN	NaN	0.7	NaN	0.785714	0.8125	1	NaN	0.956522
mouse 8	0.685439	0.563517	0.677481	0.875666	0.902685	0.754209	0.658933	0.941176	0.961862	0.961702	0.880952	0.918919	1	0.957265	0.902098	0.624521	0.962085	0.820197	0.822034	0.853125	0.725552	0.821586	0.97	0.726257
mouse 9	0.65633	0.318246	0.532417	0.590554	0.582499	0.37379	0.270942	0.772727	0.90047	0.90709	0.70155	0.85376	0.920904	0.865116	0.950549	0.881988	0.98062	0.759843	0.711538	0.829508	0.815043	0.885989	0.92487	0.90303
mouse 10	0.690715	0.329322	0.488421	0.331104	0.32613	0.101504	0.319137	0.7375	0.821577	0.972553	0.895238	0.913884	0.935484	0.788462	0.641026	0.605263	0.943662	0.644172	0.866667	0.823529	0.707965	0.895753	0.938356	0.870912
mouse 11	0.631456	0.457765	0.58982	0.75873	0.862423	0.696486	0.906863	0.75	0.942857	0.956589	0.966667	0.93253	0.85124	0.692982	0.684783	0.326241	0.540323	0.611429	0.421053	0.375	0.625144	0.844156	0.914163	0.854772
mouse 12	0.702647	0.329101	0.649888	0.694126	0.670232	0.52717	0.54375	0.910714	0.900457	0.96	0.910526	0.932203	0.9375	0.966443	0.884298	0.767742	0.97861	0.755708	0.797753	0.768362	0.740741	0.843038	0.940594	0.864583
mouse 13	0.894334	0.909091	1	0.426036	0.567345	0.603774	0.93662	0.869919	0.63072	0.878963	NaN	1	NaN	NaN	1	NaN	NaN	NaN	NaN	NaN	NaN	NaN	NaN	0.857143
mouse 14	0.942529	0.925926	NaN	0.6	0.777778	0.655172	0.9375	0.89	0.687849	0.869426	NaN	NaN	NaN	NaN	1	NaN	NaN	NaN	NaN	NaN	NaN	NaN	NaN	1
mouse 15	0.915641	0.947368	NaN	0.402778	0.423838	0.506329	0.873016	0.898256	0.654946	0.895199	NaN	1	NaN	NaN	NaN	NaN	NaN	NaN	NaN	NaN	NaN	NaN	NaN	NaN
mouse 16	0.91831	0.451613	NaN	0.85	0.599884	0.409283	0.303571	0.688073	0.632427	0.896562	NaN	1	NaN	NaN	1	NaN	NaN	NaN	NaN	NaN	NaN	NaN	NaN	NaN
mouse 17	0.949672	0.843137	0.9	0.818182	0.612725	0.583333	0.694444	0.731023	0.630179	0.815462	1	1	NaN	NaN	1	NaN	NaN	NaN	NaN	NaN	NaN	NaN	NaN	1
mouse 18	0.958254	0.974684	0.846154	0.6875	0.815405	0.891304	0.896552	0.805668	0.669483	0.587697	1	0.928571	NaN	NaN	0	NaN	NaN	NaN	NaN	NaN	NaN	NaN	NaN	1
ipsi pf-m-l
	area 1	area 2	area 3	area 4	area 5	area 6	area 7	area 8	area 9	area 10	area 11	area 12	area 13	area 14	area 15	area 16	area 17	area 18	area 19	area 20	area 21
mouse 1	0.857143	0.956623	0.993211	0.979167	0.95203	0.720302	0.827907	0.438858	0.998856	1	0.982659	1	0.950495	0.739104	0.289737	0.760528	0.763827	0.912631	0.841385	0.836037	0.978208
mouse 2	0.878788	0.965416	0.997193	0.971925	0.907473	0.707495	0.795511	0.58194	0.998198	0.97093	0.942408	1	1	0.709092	0.212631	0.594991	0.561568	0.993645	0.801699	0.846136	0.962794
mouse 3	NaN	0.926426	1	0.712329	1	0.466667	0.89781	0.306818	1	0.97561	1	1	0.984127	0.773263	0.941176	0.978982	0.989748	0.990621	0.860539	0.929253	0.994565
mouse 4	1	0.957205	0.992009	0.953519	0.93985	0.772812	0.926335	0.780656	0.997403	0.949275	0.896226	1	1	0.831854	0.410214	0.915704	0.728856	0.998648	0.727066	0.868777	0.991676
mouse 5	0.71875	0.931132	0.997738	0.957245	0.903382	0.837432	0.827692	0.696113	1	0.991453	0.897196	0.989796	0.89	0.676365	0.264151	0.751869	0.698079	0.932572	0.728456	0.796605	0.978294
mouse 6	NaN	0.971119	0.996422	0.971014	0.971154	0.613678	0.879032	0.462075	1	0.963415	0.974359	1	1	0.70281	0.857143	0.864566	0.984968	0.990605	0.729113	0.847709	0.987202
mouse 7	0.958637	0.977153	1	0.99811	1	0.920165	0.937107	0.808282	0.999252	0.990476	0.893805	1	0.946023	0.985641	0.896714	0.955202	0.993141	1	0.88764	0.923077	1
mouse 8	0.910448	0.983566	0.996078	0.985861	0.954887	0.868872	0.921827	0.811208	1	0.959302	0.947581	0.977049	0.889102	0.852916	0.850806	0.852636	0.752722	0.845123	0.85875	0.90337	0.994198
mouse 9	1	0.962869	0.99733	0.962699	0.944724	0.885017	0.90812	0.783265	0.999334	0.978261	0.912863	0.992771	0.849057	0.902322	0.691525	0.852331	0.908251	0.966547	0.923159	0.852179	0.969932
mouse 10	0.979798	0.981001	1	0.954497	0.938144	0.887226	0.916667	0.861913	1	1	NaN	1	0.944444	0.947368	0.923611	0.982624	0.954094	0.641327	0.87395	0.722222	0.8
mouse 11	0.992366	0.970015	0.982684	0.971957	0.948454	0.904762	0.882353	0.870249	0.99823	0.937853	0.969359	0.997067	0.999227	0.983955	0.91358	0.985592	0.984898	0.992233	0.843137	0.895105	0.960622
mouse 12	0.831496	0.95773	0.994624	0.943653	0.932584	0.874677	0.924282	0.779514	0.992921	0.949622	0.862595	0.982993	0.87357	0.816523	0.738397	0.886019	0.83195	0.943505	0.881018	0.885384	0.966903
mouse 13	0.870785	0.974077	0.933333	0.985948	0.869565	0.852718	0.91195	0.766716	0.95148	0.936	0.958541	0.995362	0.88785	0.953998	0.821656	0.954111	0.998195	0.979592	0.9	0.78	0.897436
mouse 14	0.906351	0.963554	1	0.984293	1	0.908982	0.976471	0.888579	0.976709	0.981481	0.877193	0.995204	0.875339	0.918288	0.830986	0.919708	0.995327	0.97561	0.967742	0.963415	0.903614
mouse 15	0.8271	0.963203	1	0.978193	NaN	0.898712	0.925	0.896907	0.920327	0.884615	0.836066	0.996697	0.805415	0.947987	0.945312	0.976636	0.992701	0.984127	NaN	0.833333	0.888889
mouse 16	0.728015	0.971114	NaN	0.995665	NaN	0.882022	0.9	0.827586	0.969866	0.942308	0.848168	1	0.864407	0.893788	0.60274	0.873635	1	0.939394	0.931034	0.977612	0.926471
mouse 17	0.815394	0.938418	1	0.935528	0.98	0.886557	0.913043	0.860835	0.911	0.89697	0.923463	0.992308	0.866755	0.896309	0.82197	0.924822	0.998686	0.988636	0.963918	0.959596	0.892857
mouse 18	0.777273	0.986646	1	0.993258	0.987448	0.915155	0.985367	0.681172	0.992032	0.966667	0.855263	0.995508	0.880824	0.901814	0.75	0.928401	0.996296	0.901515	0.935484	0.977778	0.965986
ipsi pf-m-l
	area 1	area 2	area 3	area 4	area 5	area 6	area 7	area 8	area 9	area 10	area 11	area 12	area 13	area 14	area 15	area 16	area 17	area 18	area 19	area 20	area 21
mouse 1	NaN	0.980132	0.988372	0.962963	0.859375	0.828829	0.961165	0.701681	1	NaN	0.973684	NaN	0.970803	0.91369	0.609524	0.919395	0.781641	0.77971	0.833405	0.852609	0.952612
mouse 2	0	0.953704	0.980989	1	0.875	0.826667	0.925373	0.646739	NaN	NaN	0.930556	NaN	0.951724	0.852241	0.388773	0.743928	0.631107	0.929658	0.928167	0.902321	0.97
mouse 3	NaN	0.983871	1	1	NaN	0.708333	1	0.708333	NaN	NaN	0.931034	NaN	1	0.889671	1	0.996552	1	1	0.993939	0.960526	0.984252
mouse 4	0.666667	0.982609	0.97973	0.947368	0.85	0.867925	0.828571	0.745562	1	NaN	0.918919	NaN	0.965909	0.728114	0.392265	0.860048	0.622517	0.99711	0.966601	0.963033	0.991903
mouse 5	NaN	0.97166	0.974576	0.857143	0.906977	0.971014	0.875	0.967213	1	NaN	0.878378	NaN	0.981982	0.643776	0.38806	0.711385	0.575175	0.792561	0.92201	0.879121	0.957009
mouse 6	0.0232558	0.984	0.993103	0.975	0.95	0.777778	0.930233	0.619469	1	NaN	1	NaN	0.96	0.836449	0.818182	0.900145	0.988095	0.993464	0.914754	0.941886	0.994602
mouse 7	0.984615	1	NaN	1	NaN	0.967581	1	0.872093	0.989011	1	0.97686	1	0.99686	0.997253	0.989247	0.999041	1	1	0.793103	0.666667	NaN
mouse 8	NaN	0.932384	1	0.723684	0.583333	0.963455	0.964912	0.884393	0.991525	0.96	0.982456	1	0.940559	0.89772	0.737864	0.95261	0.514863	0.913561	0.956432	0.869942	0.92233
mouse 9	1	0.889558	0.995327	0.969178	0.934783	0.95086	0.945783	0.911111	0.995122	1	0.894619	0.989583	0.905337	0.949137	0.806306	0.974328	0.702793	0.93712	0.822809	0.56993	0.627451
mouse 10	1	0.993908	1	0.99569	0.980769	0.954897	1	0.920588	1	0.973684	0.944304	1	0.993631	0.975405	0.972727	0.996156	0.907387	0.832402	0.907692	0.785714	NaN
mouse 11	0.962963	0.992647	1	0.994792	1	0.959002	0.975	0.847291	1	0.966667	0.910931	0.986667	0.92922	0.919072	0.845103	0.958927	0.961728	0.964912	0.915888	0.853933	0.858974
mouse 12	1	0.969697	0.984127	0.987531	0.933333	0.959391	0.959184	0.852459	1	0.958333	0.953815	0.993691	0.998454	0.972777	0.909449	0.992014	0.777347	0.934426	0.886228	0.617188	0.811594
mouse 13	0.955752	0.982412	NaN	0.995968	NaN	0.956989	1	0.968085	0.993166	0.970588	0.993559	0.990446	0.998201	1	0.952096	0.996552	1	0.666667	NaN	1	0.888889
mouse 14	1	0.990798	NaN	0.9869	NaN	0.947037	0.979167	0.987342	0.991398	1	0.992481	0.978723	0.994475	1	0.934426	0.994334	1	NaN	NaN	1	1
mouse 15	0.994152	0.983051	NaN	1	NaN	0.936111	NaN	0.8125	0.983454	1	0.914239	1	0.991471	1	0.902256	0.99633	1	1	1	1	1
mouse 16	0.985816	0.976857	NaN	0.989899	NaN	0.971253	1	0.98913	0.981735	NaN	0.971698	1	1	1	1	1	1	1	1	1	0.621622
mouse 17	0.974619	0.948133	NaN	0.977667	NaN	0.945003	0.516129	0.98	0.979613	0.965517	0.989384	0.992395	0.998117	1	0.993939	0.995479	1	1	1	1	0.916667
mouse 18	0.926421	0.965174	NaN	0.9967	NaN	0.968335	0.971698	0.807588	0.997992	NaN	0.963576	1	0.996815	1	0.945455	0.954738	0.992593	0.322581	0.875	1	NaN

## Sheet: Fig5C
delta ipsi-contra fILN VISp v-a-sm	area 1	area 2	area 3	area 4	area 5	area 6	area 7	area 8	area 9	area 10	area 11	area 12	area 13	area 14	area 15	area 16	area 17	area 18	area 19	area 20	area 21	area 22	area 23	area 24
mouse 1	-0.0339984	0.0597598	0.207823	0.193649	0.112115	0.0285714	NaN	NaN	0.0687964	0.0629108	0.0442039	0.10546	0.236844	0.351279	NaN	9.12597e-05	0.215226	0.0829595	-0.261341	-0.137827	0.0496596	0.1524	0.136926	0.186088
mouse 2	0.142055	0.129075	0.185887	0.216162	0.118812	0.047138	NaN	NaN	0.0703572	-0.08232	0.0416159	0.0810258	0.234836	0.279838	NaN	0.124933	0.23551	0.1226	-0.0246119	0.0162154	0.258011	0.161653	0.283126	0.0697324
mouse 3	0.230627	0.241921	0.242424	0.263158	NaN	NaN	NaN	NaN	0.254237	0.0741743	0.137928	0.169427	0.316434	0.200844	NaN	0.258603	0.357238	0.183399	0.00576163	-0.0273243	0.27065	0.296737	0.354194	0.0418535
mouse 4	-0.117568	0.0826016	0.28595	0.23489	-0.000861326	0.144338	NaN	NaN	0.122705	0.0490831	0.0253932	0.0874568	0.0991216	0.194849	NaN	0.108326	0.106221	0.17635	0.209134	0.196794	-0.0638998	-0.0681906	0.0613079	-0.199395
mouse 5	0.129494	0.0942321	0.345401	0.148086	0.0555556	-0.0526316	NaN	NaN	0.129072	0.0204176	-0.142385	0.0417623	0.199483	0.187344	NaN	0.15756	0.28386	0.385496	0.0680777	0.222336	0.25031	0.142918	0.207031	-0.103706
mouse 6	0.0397701	0.101405	0.145013	0.147525	NaN	NaN	NaN	NaN	0.110977	0.0139785	0.146624	0.11401	0.127176	0.165961	NaN	0.0481808	0.185089	0.331171	0.0451163	0.129326	0.164187	0.160612	0.275483	0.0592068
delta ipsi-contra fILN VISp pf-m-l	area 1	area 2	area 3	area 4	area 5	area 6	area 7	area 8	area 9	area 10	area 11	area 12	area 13	area 14	area 15	area 16	area 17	area 18	area 19	area 20	area 21
mouse 1	NaN	0.0235099	-0.00483904	-0.0162037	-0.0926545	0.108526	0.133258	0.262823	0.00114416	NaN	-0.00897475	NaN	0.0203079	0.174587	0.319787	0.158868	0.0178146	-0.132921	-0.00798054	0.0165721	-0.0255958
mouse 2	-0.878788	-0.0117125	-0.0162044	0.0280749	-0.0324733	0.119171	0.129862	0.0647993	NaN	NaN	-0.0118528	NaN	-0.0482759	0.143149	0.176143	0.148937	0.0695388	-0.0639869	0.126468	0.0561852	0.00720616
mouse 3	NaN	0.0574445	0	0.287671	NaN	0.241667	0.10219	0.401515	NaN	NaN	-0.0689655	NaN	0.015873	0.116408	0.0588235	0.0175694	0.0102524	0.00937866	0.133401	0.0312735	-0.0103132
mouse 4	-0.333333	0.0254035	-0.0122794	-0.00615084	-0.0898496	0.0951126	-0.0977637	-0.0350942	0.0025974	NaN	0.0226925	NaN	-0.0340909	-0.10374	-0.017949	-0.0556558	-0.10634	-0.00153821	0.239535	0.0942565	0.000226918
mouse 5	NaN	0.0405275	-0.0231613	-0.100102	0.0035951	0.133583	0.0473077	0.2711	0	NaN	-0.0188179	NaN	0.091982	-0.0325894	0.123909	-0.0404844	-0.122904	-0.140011	0.193554	0.0825161	-0.0212848
mouse 6	NaN	0.0128809	-0.00331873	0.00398551	-0.0211538	0.164099	0.0512003	0.157394	0	NaN	0.025641	NaN	-0.04	0.133638	-0.038961	0.0355791	0.00312745	0.00285862	0.185642	0.0941769	0.00740023
delta ipsi-contra fILN SSp-bfd v-a-sm	area 1	area 2	area 3	area 4	area 5	area 6	area 7	area 8	area 9	area 10	area 11	area 12	area 13	area 14	area 15	area 16	area 17	area 18	area 19	area 20	area 21	area 22	area 23	area 24
mouse 1	0.219928	NaN	0.341355	-0.103055	0.241884	0.0245157	0.0625319	0.225414	0.259613	0.115964	NaN	0.105691	NaN	NaN	0.473404	NaN	NaN	0.181884	NaN	0.185714	0.0436828	0.0465116	NaN	0.0784013
mouse 2	0.161108	NaN	0.033877	0.243407	0.307564	0.215329	-0.0509377	0.00675024	0.14565	0.0798027	0.250225	0.284343	0.520866	0.651312	0.51523	0.291931	0.49761	0.169707	0.0554255	-0.00363176	0.242948	-0.0359838	0.219139	-0.0308859
mouse 3	0.148684	NaN	-0.0704214	-0.040995	-0.0180926	-0.2281	-0.449567	-0.139986	0.151212	0.0436983	0.121708	0.175869	0.300485	0.456647	0.6385	0.568351	0.466832	0.0483966	-0.0291119	-0.0323178	0.312016	0.138388	0.121276	0.17466
mouse 4	0.239573	NaN	0.204715	0.307361	0.264042	-0.0567615	0.265458	0.731171	0.355965	0.147	0.345733	0.12817	0.366335	0.216297	0.598451	0.534147	0.623074	0.40308	-0.00875421	-0.163691	0.110404	-0.0573721	0.0481828	-0.0471206
mouse 5	0.125509	NaN	0.105632	0.21455	0.348129	0.333931	0.51256	-0.127301	0.246268	0.138356	0.0153153	0.0624342	0.215851	0.48649	0.594698	0.00584832	0.141273	0.142383	0.102636	-0.223419	0.126126	-0.0634654	0.0362561	-0.144178
mouse 6	0.167426	NaN	0.00470228	0.0685662	0.179874	0.00312884	0.0323192	0.174409	0.244131	0.105011	0.161698	0.186024	0.391425	0.597645	0.64552	0.525611	0.569876	0.135511	0.056035	-0.0784336	0.245108	0.027707	0.189319	0.182389
delta ipsi-contra fILN SSp-bfd pf-m-l	area 1	area 2	area 3	area 4	area 5	area 6	area 7	area 8	area 9	area 10	area 11	area 12	area 13	area 14	area 15	area 16	area 17	area 18	area 19	area 20	area 21
mouse 1	0.0259779	0.0228471	NaN	0.00189036	NaN	0.0474164	0.0628931	0.0638108	-0.0102411	0.00952381	0.0830542	0	0.0508376	0.0116117	0.0925337	0.0438389	0.00685871	0	-0.094537	-0.25641	NaN
mouse 2	NaN	-0.0511815	0.00392157	-0.262177	-0.371554	0.0945831	0.0430849	0.0731852	-0.00847458	0.000697674	0.0348755	0.0229508	0.0514572	0.0448039	-0.112942	0.0999745	-0.237858	0.0684372	0.0976815	-0.0334275	-0.071868
mouse 3	0	-0.0733108	-0.00200267	0.006479	-0.00994101	0.0658425	0.0376635	0.127846	-0.00421227	0.0217391	-0.0182442	-0.00318775	0.0562808	0.0468146	0.114781	0.121998	-0.205457	-0.0294269	-0.10035	-0.282249	-0.342481
mouse 4	0.020202	0.0129065	0	0.0411923	0.0426249	0.0676714	0.0833333	0.0586749	0	-0.0263158	NaN	0	0.0491861	0.0280365	0.0491162	0.0135322	-0.0467073	0.191075	0.0337427	0.0634921	NaN
mouse 5	-0.0294034	0.0226325	0.017316	0.0228343	0.0515464	0.0542399	0.0926471	-0.0229584	0.00176991	0.0288136	-0.0584282	-0.0104008	-0.0700076	-0.0648833	-0.0684777	-0.0266653	-0.0231691	-0.0273207	0.0727506	-0.0411723	-0.101647
mouse 6	0.168504	0.0119668	-0.0104967	0.0438779	0.000749064	0.0847139	0.0349017	0.0729451	0.00707881	0.00871117	0.0912198	0.0106977	0.124885	0.156254	0.171052	0.105995	-0.0546028	-0.00907911	0.00520928	-0.268196	-0.155309
delta ipsi-contra fILN MOp v-a-sm	area 1	area 2	area 3	area 4	area 5	area 6	area 7	area 8	area 9	area 10	area 11	area 12	area 13	area 14	area 15	area 16	area 17	area 18	area 19	area 20	area 21	area 22	area 23	area 24
mouse 1	0.233134	0.460639	0.354839	0.0908471	0.109342	0.253709	0.437324	0.409777	NaN	0.178609	NaN	0	NaN	NaN	0.333333	NaN	NaN	NaN	NaN	NaN	NaN	NaN	NaN	-0.0676863
mouse 2	0.263527	0.303855	NaN	0.0249364	0.301443	0.209529	0.311927	0.311744	NaN	0.113177	NaN	NaN	NaN	NaN	0	NaN	NaN	NaN	NaN	NaN	NaN	NaN	NaN	0.122449
mouse 3	0.377239	0.593316	NaN	0.0215623	-0.00377911	0.171994	0.486919	0.437218	NaN	0.249116	NaN	0	NaN	NaN	NaN	NaN	NaN	NaN	NaN	NaN	NaN	NaN	NaN	NaN
mouse 4	0.315507	-0.0924285	NaN	0.336253	0.150919	0.142422	-0.336466	0.400656	NaN	0.180371	NaN	0	NaN	NaN	NaN	NaN	NaN	NaN	NaN	NaN	NaN	NaN	NaN	NaN
mouse 5	0.330286	0.35429	0.181437	0.234207	0.0935982	0.0787123	0.136117	0.242985	NaN	0.134796	0	0.0350877	NaN	NaN	0.571429	NaN	NaN	NaN	NaN	NaN	NaN	NaN	NaN	0.210702
mouse 6	0.341334	0.37952	0.14172	0.162231	0.334265	0.461006	0.282217	0.166174	NaN	-0.117426	0	-0.0322129	NaN	NaN	-0.75	NaN	NaN	NaN	NaN	NaN	NaN	NaN	NaN	0.0967213
delta ipsi-contra fILN MOp pf-m-l	area 1	area 2	area 3	area 4	area 5	area 6	area 7	area 8	area 9	area 10	area 11	area 12	area 13	area 14	area 15	area 16	area 17	area 18	area 19	area 20	area 21
mouse 1	0.0849677	0.00833508	NaN	0.0100193	NaN	0.104271	0.0880503	0.201369	0.0416864	0.0345882	0.0350181	-0.00491646	0.110351	0.0460022	0.13044	0.0424408	0.00180505	-0.312925	NaN	0.22	-0.00854701
mouse 2	0.0936491	0.027244	NaN	0.00260637	NaN	0.0380545	0.00269608	0.0987624	0.014689	0.0185185	0.115288	-0.0164804	0.119136	0.0817121	0.10344	0.0746262	0.0046729	NaN	NaN	0.0365854	0.0963855
mouse 3	0.167053	0.0198474	NaN	0.0218069	NaN	0.0373987	NaN	-0.0844072	0.0631268	0.115385	0.0781739	0.00330251	0.186057	0.0520134	-0.0430569	0.0196948	0.00729927	0.015873	NaN	0.166667	0.111111
mouse 4	0.257801	0.00574332	NaN	-0.00576575	NaN	0.0892301	0.1	0.161544	0.0118691	NaN	0.123531	0	0.135593	0.106212	0.39726	0.126365	0	0.0606061	0.0689655	0.0223881	-0.304849
mouse 5	0.159225	0.00971431	NaN	0.0421394	NaN	0.0584463	-0.396914	0.119165	0.0686124	0.0685475	0.0659213	8.7745e-05	0.131362	0.103691	0.17197	0.0706567	0.00131406	0.0113636	0.0360825	0.040404	0.0238095
mouse 6	0.149149	-0.0214722	NaN	0.00344181	NaN	0.0531796	-0.0136691	0.126416	0.0059601	NaN	0.108313	0.00449236	0.115991	0.0981857	0.195455	0.0263374	-0.0037037	-0.578935	-0.0604839	0.0222222	NaN
