# Supplementary material for: Layer 6 corticocortical neurons are a major route for intra- and interhemispheric feedback
Source: eLife. 2025 Mar 28;13:RP100478. doi: 10.7554/eLife.100478 (PMC11952746; doi:10.7554/eLife.100478)
Supplement: Figure 6—source data 1. [file elife-100478-fig6-data1.xlsx]

## Sheet: Fig6B
v-a-sm laminar fraction
VISp	L2/3 ipsi	L2/3 contra	L5 ipsi	L5 contra	L6 ipsi	L6 contra
mouse 1	0.248022	0.169044	0.208706	0.169099	0.414048	0.445755
mouse 2	0.251468	0.145913	0.198266	0.217107	0.385643	0.437373
mouse 3	0.267674	0.101028	0.213742	0.2505	0.322846	0.396391
mouse 4	0.299111	0.233796	0.168044	0.190098	0.367362	0.371734
mouse 5	0.273476	0.172919	0.180381	0.265918	0.370727	0.394087
mouse 6	0.193498	0.090307	0.197225	0.177478	0.439257	0.457715
SSp-bfd	L2/3 ipsi	L2/3 contra	L5 ipsi	L5 contra	L6 ipsi	L6 contra
mouse 1	0.362585	0.138007	0.216588	0.110792	0.328548	0.432861
mouse 2	0.331683	0.160386	0.264977	0.360123	0.29227	0.425101
mouse 3	0.321349	0.245258	0.268377	0.310763	0.28967	0.390638
mouse 4	0.458777	0.292388	0.356778	0.310556	0.0426886	0.35471
mouse 5	0.353533	0.262413	0.254506	0.268212	0.253736	0.391066
mouse 6	0.349798	0.200903	0.279873	0.312638	0.24605	0.426478
MOp	L2/3 ipsi	L2/3 contra	L5 ipsi	L5 contra	L6 ipsi	L6 contra
mouse 1	0.260567	0.104577	0.121148	0.132869	0.257039	0.325591
mouse 2	0.183642	0.0742331	0.0986487	0.0735747	0.32196	0.308647
mouse 3	0.225677	0.0989374	0.0932183	0.0671856	0.212027	0.23708
mouse 4	0.246122	0.141155	0.110634	0.113824	0.254624	0.225087
mouse 5	0.255621	0.101014	0.136618	0.142506	0.323189	0.339669
mouse 6	0.204159	0.0907506	0.199724	0.164507	0.331948	0.305896

## Sheet: Fig6C
Area	V1dL2/3	V1dL5	V1dL6	S1dL2/3	S1dL5	S1dL6	M1dL2/3	M1dL5	M1dL6	V1L2/3sig	V1L5sig	V1L6sig	S1L2/3sig	S1L5sig	S1L6sig	M1L2/3sig	M1L5sig	M1L6sig
FRP	0.294126	-0.0802264	-0.363454	-0.0458054	-0.0495801	-0.0665047	-0.151974	-0.220737	0.373631	0	0	1	0	0	0	1	1	1
ACAd	-0.0246756	-0.00591641	0.0289736	0.00902324	0.0933297	-0.102396	-0.00823532	0.0534525	-0.0454628	0	0	0	0	0	0	0	0	0
ACAv	0.00996714	-0.000470994	0.00260879	-0.00145637	0.0334501	0.115967	-0.0111111	-0.00833333	-0.193724	1	0	0	0	0	0	0	0	1
PL	-0.0328792	0.167693	-0.145028	0.0243172	0.117391	-0.140998	-0.0123747	-0.0273299	0.0378553	0	1	1	0	0	0	0	0	0
ILA	0.038756	0.0159409	-0.213093	0.0477624	0.0846965	-0.303946	-0.0271645	-0.331846	-0.302231	0	0	1	0	0	1	0	1	1
ORBl	-0.143693	0.149062	-0.00379128	-0.0690779	0.121244	-0.0435109	-0.06343	0.19337	-0.104616	1	1	0	1	1	0	1	1	0
ORBm	-0.061009	0.219175	-0.152511	-0.0590873	0.0996534	-0.0396402	0.0241395	-0.281502	0.0922505	0	1	1	1	0	0	0	1	0
ORBvl	-0.18709	0.181355	0.00687296	-0.0622506	0.0477098	0.0206342	-0.103808	-0.116568	0.229226	1	1	0	1	0	0	0	1	1
AId	-0.000923895	0.0680237	-0.324463	0.00234653	0.242114	-0.206845	-0.034324	0.105367	-0.0467253	0	0	0	0	1	1	1	1	0
AIv	-0.0248862	-0.434245	-0.489324	-0.00719493	0.265526	-0.218252	-0.0546774	0.0840956	-0.308179	1	1	1	0	1	1	1	0	1
Alp	0.0100462	0.619169	-0.484387	-0.0127968	0.30862	-0.112082	-0.0877075	0.151542	-0.059304	0	1	1	0	1	1	1	1	0
GU	-0.0016835	-0.0903863	-0.800245	-0.00399649	0.651791	-0.614653	0.00226956	0.40722	-0.374333	0	1	1	0	1	1	0	1	1
VISC	-0.00135882	0.417445	-0.247661	-0.0401715	0.193813	-0.137601	-0.123461	0.188269	0.0322734	0	1	1	0	1	0	1	0	0
TEa	-0.0642747	0.0915611	-0.0120395	-0.0325481	-0.00504455	0.0808066	-0.0777772	0.186973	-0.0524039	0	1	0	0	0	0	1	0	0
PERI	-0.103625	0.112026	-0.00532175	-0.0410105	0.159494	-0.113938	-0.159251	0.241657	-0.0824058	0	0	0	0	1	1	1	1	1
ECT	-0.0441355	0.127553	-0.0624519	-0.0597788	0.0291849	0.0353389	-0.0600202	0.104422	-0.0409894	0	1	0	0	0	0	1	0	0
SSs	-0.0685214	0.0764003	0.0671804	-0.119902	0.065705	0.151405	-0.268552	0.100419	0.28874	0	0	0	1	1	1	1	0	1
SSp-bfd	-0.116164	-0.0155038	0.122925	NaN	NaN	NaN	-0.312724	0.0486185	0.298529	1	0	1	0	0	0	1	0	1
SSp-tr	-0.229948	-0.0416624	0.201312	-0.0582499	0.0200648	0.114799	-0.224116	-0.0491598	-0.213695	1	0	1	0	0	1	1	0	0
SSp-ll	-0.197984	0.00627798	0.138425	-0.0924196	-0.0186655	0.162519	-0.109742	-0.0135358	0.17585	1	0	0	0	0	1	0	0	1
SSp-ul	-0.0736095	0.00539307	-0.112845	-0.194393	-0.0325801	0.260748	-0.1397	-0.0363253	0.21363	1	0	0	1	1	1	1	0	1
SSp-un	-0.0605135	-1.93736e-05	-0.16354	0.0201461	-0.0854226	0.180934	-0.174506	-0.0542495	0.282763	0	0	0	0	1	0	1	1	1
SSp-n	0	0	-0.540827	-0.0579425	-0.00348503	0.0832826	-0.210454	-0.0109863	0.252841	0	0	1	0	0	0	0	0	0
SSp-m	0	0	-0.568526	-0.14034	0.0435079	0.199596	-0.310157	0.0902955	0.267877	0	0	1	0	1	0	1	1	1
MOp	-0.126024	0.0428247	0.0873681	-0.233806	-0.0200198	0.257444	NaN	NaN	NaN	1	0	0	1	0	1	0	0	0
MOs	-0.0230407	0.018156	0.00237046	-0.104972	0.00226753	0.103561	-0.123107	-0.0364594	0.160896	0	0	0	1	0	0	0	0	1
VISpl	-0.0416055	0.131015	-0.0812601	-0.15492	0.0466718	-0.0364631	0	0.109259	-0.109259	0	1	0	1	0	0	0	0	0
VISpor	-0.0943704	0.0555221	0.0461681	-0.154131	0.0337388	0.122327	-0.000479139	-0.257515	0.0837513	1	1	0	1	0	1	0	1	0
VISli	-0.164036	0.0186171	0.19502	-0.304589	0.0704397	0.184261	0	0	0	1	0	1	1	0	0	0	0	0
VISl	-0.188868	-0.0107607	0.239068	-0.446271	0.0376199	0.350659	0	0	0	1	0	1	1	0	1	0	0	0
VISp	NaN	NaN	NaN	-0.428032	0.059434	0.512532	-0.198611	0.141667	-0.0791667	0	0	0	1	0	1	0	0	0
VISrl	-0.106931	-0.0202894	0.136712	-0.374644	0.0198034	0.267634	-0.333984	-0.019765	-0.285605	1	0	1	1	0	0	1	0	1
VISal	-0.191833	0.00125585	0.227258	-0.41497	0.16056	0.223735	0	0	0	1	0	1	1	0	0	0	0	0
VISa	-0.187864	-0.000157512	0.180371	-0.108859	0.0563415	0.172941	-0.267678	-0.144881	-0.338061	1	0	1	1	0	1	1	1	1
VISpm	0.006985	-0.106128	0.117998	-0.0767295	-0.0383473	0.116773	0	0	0	0	0	1	0	0	0	0	0	0
VISam	-0.0539352	-0.0582528	0.111705	0.0711952	-0.0819661	0.0783338	0	0	0	0	0	1	0	0	1	0	0	0
RSPagl	-0.145103	-0.126102	0.24474	-0.00241618	-0.0931934	0.0858444	-0.0294704	0.129492	-0.222339	1	0	1	0	0	0	0	0	0
RSPd	-0.0624967	-0.239192	0.286423	0.136327	-0.175629	0.0299587	-0.0847111	0.0622028	0.0262624	1	1	1	0	1	0	0	0	0
RSPv	0.00706009	-0.509231	0.487861	0.0785508	-0.470985	0.0565708	0.0080127	0.031091	-0.1811	0	1	1	0	1	0	0	0	0
AUDd	-0.153183	0.057252	0.106744	-0.145259	0.0210376	0.220035	-0.334995	-0.115176	-0.409613	1	0	0	1	0	1	1	1	1
AUDp	-0.139383	0.127501	0.0307427	-0.00912346	-0.00458002	0.0524165	-0.0670338	-0.202878	-0.29343	1	1	0	0	0	0	0	1	1
AUDpo	-0.201078	0.119969	0.0976605	-0.111114	-0.0622039	0.0484815	0	0	0	1	1	1	1	0	0	0	0	0
AUDv	-0.0159382	0.1047	-0.0601448	-0.0407589	0.0682072	-0.0415808	-0.0967427	0.163063	-0.277249	0	1	0	0	0	0	0	0	0
ENTl	0.0214185	-0.0127608	0.0057571	0.0934894	-0.00536933	-0.0420831	-0.00189793	-0.0290105	0.095536	0	0	0	0	0	0	0	0	0
ENTm	0.0543699	0.114903	-0.0821043	-0.032281	-0.0150348	0.159203	0.160803	0.167161	-0.225339	0	1	0	0	0	0	0	1	0

## Sheet: Fig6D
VISp	decrease	increase
L2/3	0.5833	0
L5	0	0.2083
L6a	0.0833	0.4167
SSp-bfd
L2/3	0.291667	0.166667
L5	0.0416667	0.208333
L6a	0	0.375
MOp
L2/3	0.291667	0.166667
L5	0.0416667	0.208333
L6a	0	0.375

## Sheet: Fig6E
ipsi	area 1	area 2	area 3	area 4	area 5	area 6	area 7	area 8	area 9	area 10	area 11	area 12	area 13	area 14	area 15	area 16	area 17	area 18	area 19	area 20	area 21	area 22	area 23	area 24
fILN mean	0.419219	0.456178	0.463416	0.493438	0.574465	0.582136	0.583297	0.590611	0.597807	0.614997	0.620974	0.62855	0.641319	0.651702	0.66104	0.666408	0.714361	0.76273	0.765759	0.773784	0.81522	0.815635	0.826109	0.839608
fILN sem	0.0713046	0.0258385	0.0533356	0.049885	0.0137848	0.0331317	0.0440748	0.0624893	0.0294672	0.055825	0.0269673	0.0364402	0.0319706	0.0412115	0.0639475	0.0413401	0.0700404	0.0292389	0.0301162	0.0384576	0.0342875	0.0210489	0.0366805	0.0228943
fILN mean excl L5	0.331451	0.334141	0.355771	0.372428	0.396941	0.422078	0.431222	0.454135	0.488779	0.53187	0.54133	0.547468	0.549233	0.567819	0.581038	0.606983	0.613371	0.628522	0.647781	0.652649	0.654238	0.665422	0.709863	0.73801
fILN sem excl L5	0.0695255	0.0318604	0.03962	0.0592837	0.0208217	0.0574904	0.0306041	0.0384227	0.041667	0.046554	0.0446973	0.0703411	0.0444828	0.0353812	0.061292	0.0679348	0.0376385	0.075835	0.0671554	0.0509151	0.038646	0.0462716	0.070862	0.0382471
fILN mean excl L6	0.037391	0.0612716	0.111042	0.135389	0.1423	0.181844	0.223702	0.254926	0.269504	0.279711	0.295872	0.317026	0.348341	0.392068	0.404925	0.560162	0.562203	0.572063	0.621245	0.669381	0.686868	0.721434	0.765718	0.774781
fILN sem excl L6	0.00600584	0.00976599	0.0142374	0.0273162	0.02149	0.0530379	0.0191785	0.0172923	0.0174335	0.0785188	0.0319865	0.0548442	0.0296705	0.0270396	0.0153192	0.0498425	0.0563604	0.0282971	0.0549692	0.0422832	0.0341943	0.0248802	0.0427876	0.0400334

## Sheet: Fig6F
contra
fILN mean		0.660674	0.66243	0.693182	0.710859	0.712851	0.722308	0.736816	0.738889	0.769242	0.772737	0.790849	0.797085	0.797977	0.805065	0.807055	0.807935	0.822826	0.831929	0.84113	0.845408	0.874042	0.894662	0.895207	0.899341
fILN sem		0.0607385	0.058951	0.0298016	0.058828	0.030215	0.0405749	0.0494313	0.0483881	0.024405	0.0329857	0.0249937	0.0565388	0.0395813	0.0348038	0.0342178	0.0381996	0.03178	0.0227464	0.023113	0.034737	0.0258254	0.0234693	0.024636	0.0213541
fILN mean excl L5		0.540375	0.62804	0.630156	0.651184	0.656275	0.662635	0.664707	0.682011	0.682618	0.695369	0.696365	0.711009	0.722728	0.723523	0.73126	0.747602	0.751049	0.760293	0.761259	0.766917	0.772499	0.788037	0.815085	0.824781
fILN sem excl L5		0.03287	0.0351922	0.0381668	0.0626592	0.0600204	0.0643363	0.0382904	0.0471295	0.0423365	0.0438981	0.061784	0.0536329	0.0531925	0.0513591	0.0566765	0.0294447	0.0440896	0.0454075	0.0470726	0.0573123	0.0339833	0.0465804	0.0252304	0.0272437
fILN mean excl L6		0.102347	0.103587	0.227569	0.251491	0.260712	0.29755	0.354684	0.453651	0.465689	0.466482	0.509549	0.521911	0.559758	0.569966	0.572055	0.629695	0.665911	0.686364	0.706276	0.7363	0.821385	0.828513	0.846923	0.86593
fILN sem excl L6		0.0447529	0.0324293	0.0431596	0.0296283	0.0579928	0.0284066	0.0389626	0.0424031	0.0438958	0.0305406	0.0592083	0.0610712	0.0318775	0.060474	0.0348755	0.0597654	0.0485642	0.0683032	0.0332213	0.0836263	0.0445631	0.0548137	0.047839	0.035484
